# Supplementary material for: Comparative Transcriptome Analysis of Male Sterile Anthers Induced by High Temperature in Wheat (Triticum aestivum L.)
Source: PubMed Central journal article supplement (PMC8573241; doi:10.3389/fpls.2021.727966), 2021-10-25

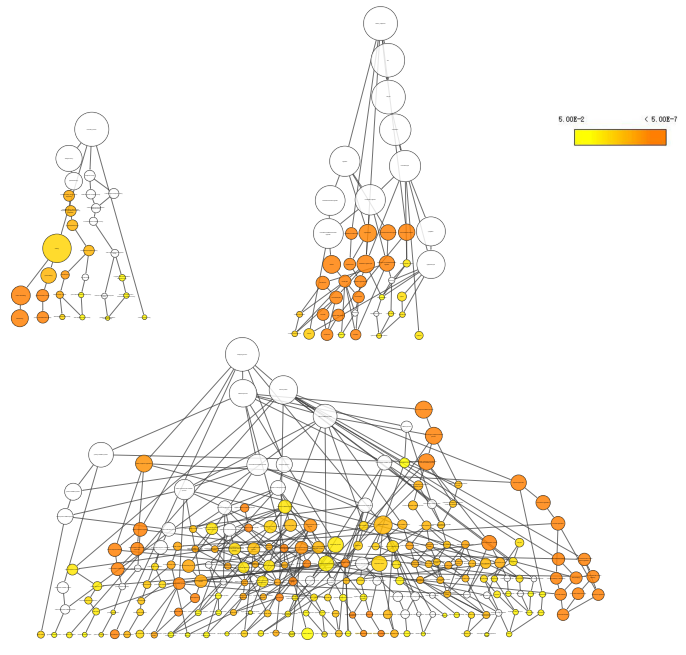

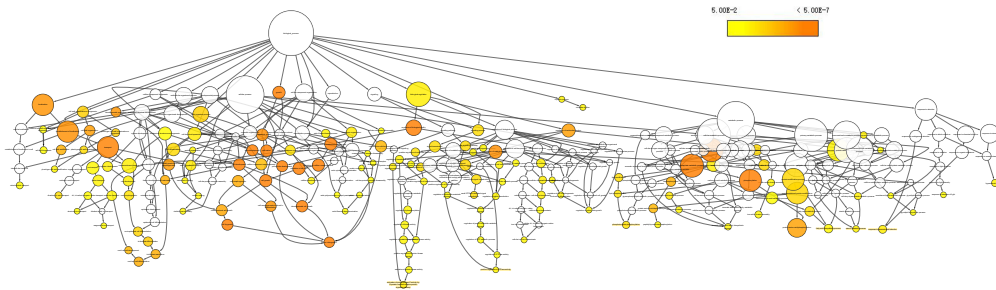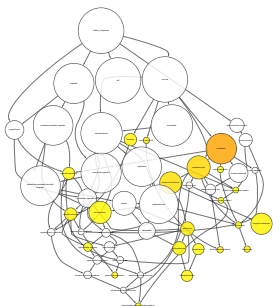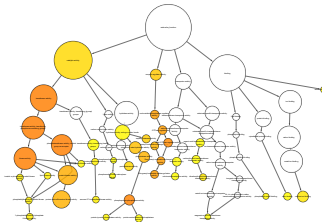

Supplement: Data_Sheet_3.pdf [file Data_Sheet_3.pdf]
