# Supplementary material for: Comparative Transcriptome Analysis of Male Sterile Anthers Induced by High Temperature in Wheat (Triticum aestivum L.)
Source: PubMed Central journal article supplement (PMC8573241; doi:10.3389/fpls.2021.727966), 2021-10-25

# Peroxidase activity and response to oxidative stress

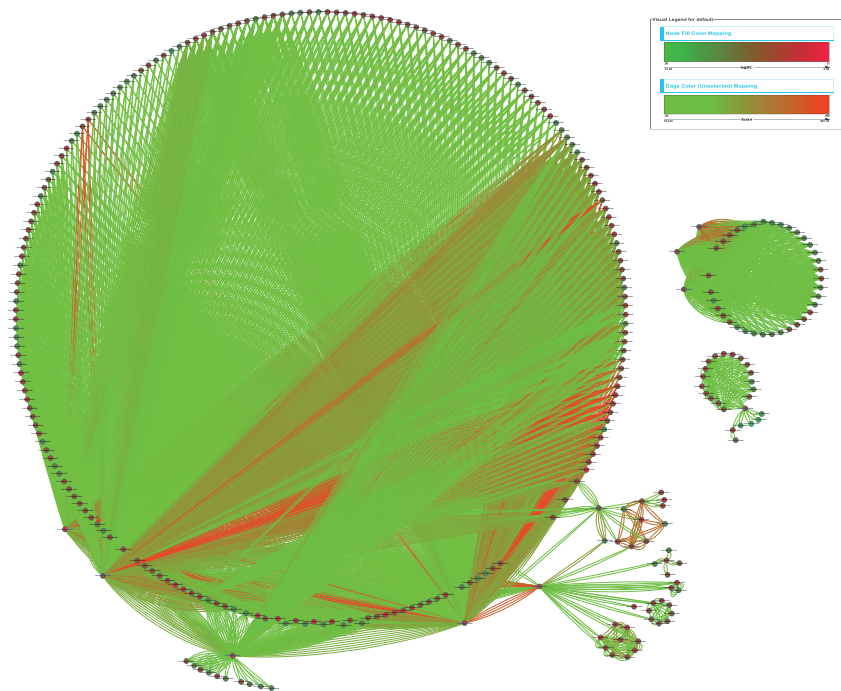

# Starch and sucrose metabolism

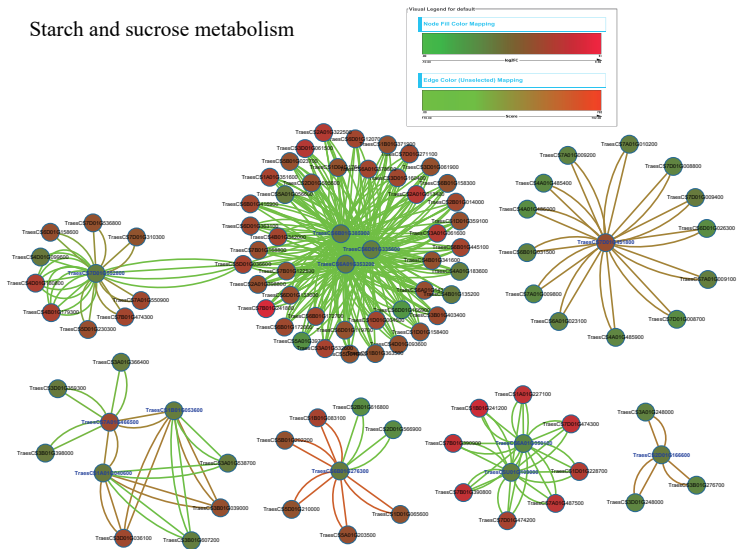



# Heme binding

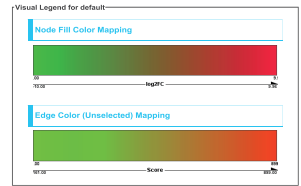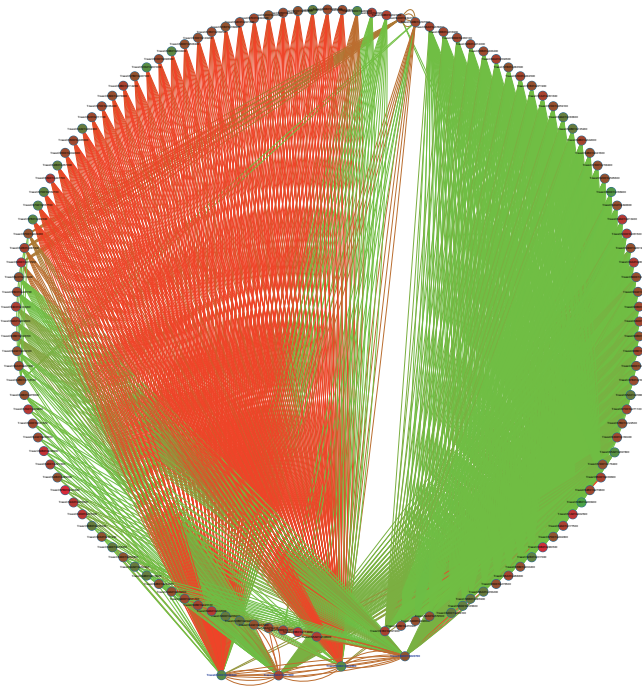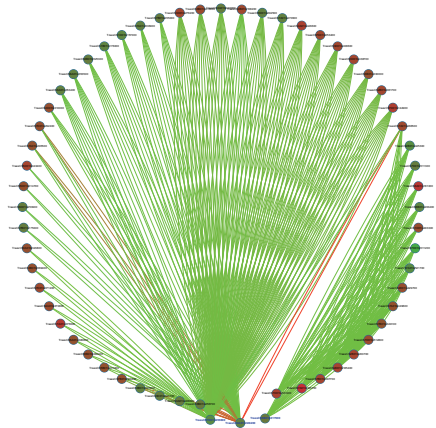

Supplement: Data_Sheet_5.pdf [file Data_Sheet_5.pdf]
