# Supplementary material for: Comparative Transcriptome Analysis of Male Sterile Anthers Induced by High Temperature in Wheat (Triticum aestivum L.)
Source: Front Plant Sci. 2021 Oct 25;12:727966. doi: 10.3389/fpls.2021.727966 (PMC8573241; doi:10.3389/fpls.2021.727966)
Supplement: Supplementary file 8 [file Data_Sheet_2.xlsx]

## Sheet: BINGO-up-regulated
GO ID	GO Description	P-value	Corrected P-value	Cluster frequency	Total frequency	Genes
43228	non-membrane-bounded organelle	5.8426e-24	8.4775e-21	294/2105 13.9%	377/3886 9.7%	TraesCS7A01G119900 TraesCS7D01G488500 TraesCS6A01G061700 TraesCS7A01G465300 TraesCS1D01G286600 TraesCS5A01G098300 TraesCS7A01G369500 TraesCS6A01G148100 TraesCS4A01G320200 TraesCS6B01G443800 TraesCS7B01G111000 TraesCS4A01G003800 Triticum_aestivum_newGene_24844 TraesCS2D01G459000 TraesCS1D01G366600 TraesCS2B01G411600 TraesCS7B01G019000 TraesCS2D01G458700 TraesCS3D01G264700 TraesCS4D01G322700 TraesC…
43232	intracellular non-membrane-bounded organelle	5.8426e-24	8.4775e-21	294/2105 13.9%	377/3886 9.7%	TraesCS7A01G119900 TraesCS7D01G488500 TraesCS6A01G061700 TraesCS7A01G465300 TraesCS1D01G286600 TraesCS5A01G098300 TraesCS7A01G369500 TraesCS6A01G148100 TraesCS4A01G320200 TraesCS6B01G443800 TraesCS7B01G111000 TraesCS4A01G003800 Triticum_aestivum_newGene_24844 TraesCS2D01G459000 TraesCS1D01G366600 TraesCS2B01G411600 TraesCS7B01G019000 TraesCS2D01G458700 TraesCS3D01G264700 TraesCS4D01G322700 TraesC…
5694	chromosome	4.0246e-22	3.8931e-19	212/2105 10.0%	259/3886 6.6%	TraesCS7A01G119900 TraesCS7D01G488500 TraesCS6A01G061700 TraesCS1D01G286600 TraesCS5A01G098300 TraesCS6B01G443800 TraesCS7B01G111000 TraesCS4A01G003800 Triticum_aestivum_newGene_24844 TraesCS1D01G366600 TraesCS2B01G411600 TraesCS7B01G019000 TraesCS3D01G340800 TraesCS7D01G116600 TraesCS3D01G088900 TraesCSU01G182300 TraesCS4D01G167700 TraesCS5D01G110600 TraesCS2A01G469400 TraesCS6D01G040400 TraesCS…
3676	nucleic acid binding	1.6499e-21	1.197e-18	458/2105 21.7%	646/3886 16.6%	Triticum_aestivum_newGene_59141 TraesCS6A01G061700 TraesCS1B01G254300 Triticum_aestivum_newGene_37599 TraesCS2B01G419200 TraesCS1D01G286600 TraesCS7A01G533200 TraesCS5A01G098300 TraesCS1D01G225200 TraesCS3A01G417300 TraesCS4A01G003800 TraesCS1D01G366600 TraesCS2B01G411600 TraesCS7B01G128000 TraesCS5A01G143200 TraesCS6A01G413400 Triticum_aestivum_newGene_69196 TraesCS7D01G116600 TraesCS1D01G149800…
3677	DNA binding	9.5762e-21	5.558e-18	367/2105 17.4%	502/3886 12.9%	TraesCS7A01G119900 TraesCS7D01G488500 TraesCS6A01G061700 TraesCS1B01G254300 Triticum_aestivum_newGene_37599 TraesCS2B01G419200 TraesCS1D01G286600 TraesCS7B01G305000 TraesCS1D01G059200 TraesCS5A01G098300 TraesCS7A01G369500 TraesCS1D01G225200 Triticum_aestivum_newGene_56676 TraesCS3A01G417300 TraesCS6B01G443800 TraesCS4A01G003800 Triticum_aestivum_newGene_22787 TraesCS1D01G366600 TraesCS2B01G411600…
6325	chromatin organization	1.8619e-20	9.0053e-18	224/2105 10.6%	281/3886 7.2%	TraesCS7A01G119900 TraesCS7D01G488500 TraesCS6A01G061700 TraesCS6D01G151700 TraesCS1A01G380700 TraesCS1D01G286600 TraesCS5A01G098300 TraesCS6B01G443800 TraesCS2B01G247100 Triticum_aestivum_newGene_24844 Triticum_aestivum_newGene_57883 TraesCS1D01G366600 TraesCS2B01G411600 TraesCS7B01G019000 TraesCS3D01G340800 TraesCS7D01G116600 TraesCS3D01G088900 TraesCSU01G182300 TraesCS5D01G110600 TraesCS2A01G4…
51276	chromosome organization	3.5007e-20	1.4513e-17	248/2105 11.7%	318/3886 8.1%	TraesCS7A01G119900 TraesCS7D01G488500 TraesCS6A01G061700 TraesCS6D01G151700 TraesCS1A01G380700 TraesCS1D01G286600 TraesCS5A01G098300 TraesCS6B01G443800 TraesCS7B01G111000 TraesCS2B01G247100 Triticum_aestivum_newGene_24844 Triticum_aestivum_newGene_57883 TraesCS1D01G366600 TraesCS2B01G411600 TraesCS7B01G019000 TraesCS3D01G340800 TraesCS7D01G116600 TraesCS4B01G097500 TraesCS3D01G088900 TraesCSU01G1…
44427	chromosomal part	1.1078e-18	4.0185e-16	192/2105 9.1%	238/3886 6.1%	TraesCS7A01G119900 TraesCS7D01G488500 TraesCS6A01G061700 TraesCS2D01G329700 TraesCS6B01G079000 TraesCS1D01G286600 TraesCS1A01G314000 TraesCS1A01G361900 TraesCS5A01G098300 TraesCS1B01G301100 TraesCS5D01G478400 TraesCS1A01G228800 TraesCS1A01G295400 TraesCS6B01G443800 TraesCS7B01G111000 TraesCS4A01G003800 Triticum_aestivum_newGene_24844 TraesCS7B01G016000 TraesCS2B01G415800 TraesCS1D01G366600 TraesC…
6139	nucleobase, nucleoside, nucleotide and nucleic acid metabolic process	1.4051e-17	4.5307e-15	331/2105 15.7%	457/3886 11.7%	TraesCS7D01G203800 TraesCS1D01G345100 TraesCS3B01G149800 TraesCS2B01G419200 TraesCS5A01G098300 TraesCS7A01G183900 TraesCS7D01G424400 Triticum_aestivum_newGene_56676 TraesCS6A01G148100 TraesCS2B01G247100 TraesCS4A01G003800 Triticum_aestivum_newGene_24844 TraesCS7B01G260800 Triticum_aestivum_newGene_22787 TraesCS7D01G386600 TraesCS4A01G020800 TraesCS2D01G458700 Triticum_aestivum_newGene_63776 Traes…
70013	intracellular organelle lumen	2.6752e-17	7.0577e-15	157/2105 7.4%	190/3886 4.8%	TraesCS2D01G600900 TraesCS7D01G488500 Triticum_aestivum_newGene_52907 TraesCS6B01G079000 TraesCS1D01G286600 TraesCS5A01G098300 TraesCS1B01G301100 TraesCS7A01G369500 TraesCS7B01G390900 TraesCS6A01G148100 TraesCS1A01G295400 TraesCS4A01G003800 Triticum_aestivum_newGene_24844 TraesCS2D01G459000 TraesCS2B01G411600 TraesCS4D01G205000 Triticum_aestivum_newGene_39089 Triticum_aestivum_newGene_18443 Traes…
43233	organelle lumen	2.6752e-17	7.0577e-15	157/2105 7.4%	190/3886 4.8%	TraesCS2D01G600900 TraesCS7D01G488500 Triticum_aestivum_newGene_52907 TraesCS6B01G079000 TraesCS1D01G286600 TraesCS5A01G098300 TraesCS1B01G301100 TraesCS7A01G369500 TraesCS7B01G390900 TraesCS6A01G148100 TraesCS1A01G295400 TraesCS4A01G003800 Triticum_aestivum_newGene_24844 TraesCS2D01G459000 TraesCS2B01G411600 TraesCS4D01G205000 Triticum_aestivum_newGene_39089 Triticum_aestivum_newGene_18443 Traes…
44428	nuclear part	6.3732e-17	1.5413e-14	168/2105 7.9%	207/3886 5.3%	TraesCS7D01G488500 Triticum_aestivum_newGene_52907 TraesCS2D01G329700 TraesCS6B01G079000 TraesCS1D01G286600 TraesCS5A01G098300 TraesCS1B01G301100 TraesCS7A01G369500 TraesCS7B01G390900 TraesCS1D01G427800 TraesCS6A01G148100 TraesCS1A01G295400 TraesCS4A01G003800 Triticum_aestivum_newGene_24844 TraesCS2D01G459000 TraesCS2B01G411600 TraesCS4D01G205000 Triticum_aestivum_newGene_39089 Triticum_aestivum_…
31974	membrane-enclosed lumen	1.2071e-16	2.6946e-14	158/2105 7.5%	193/3886 4.9%	TraesCS2D01G600900 TraesCS7D01G488500 Triticum_aestivum_newGene_52907 TraesCS6B01G079000 TraesCS1D01G286600 TraesCS5A01G098300 TraesCS1B01G301100 TraesCS7A01G369500 TraesCS7B01G390900 TraesCS6A01G148100 TraesCS1A01G295400 TraesCS4A01G003800 Triticum_aestivum_newGene_24844 TraesCS2D01G459000 TraesCS2B01G411600 TraesCS4D01G205000 Triticum_aestivum_newGene_39089 Triticum_aestivum_newGene_18443 Traes…
31981	nuclear lumen	1.3451e-16	2.7882e-14	149/2105 7.0%	180/3886 4.6%	TraesCS7D01G488500 Triticum_aestivum_newGene_52907 TraesCS6B01G079000 TraesCS1D01G286600 TraesCS5A01G098300 TraesCS1B01G301100 TraesCS7A01G369500 TraesCS7B01G390900 TraesCS6A01G148100 TraesCS1A01G295400 TraesCS4A01G003800 Triticum_aestivum_newGene_24844 TraesCS2D01G459000 TraesCS2B01G411600 TraesCS4D01G205000 Triticum_aestivum_newGene_39089 Triticum_aestivum_newGene_18443 TraesCS5B01G243500 Traes…
34641	cellular nitrogen compound metabolic process	4.3609e-16	8.437e-14	361/2105 17.1%	512/3886 13.1%	TraesCS7D01G203800 TraesCS1D01G345100 TraesCS3B01G149800 TraesCS2B01G419200 TraesCS5A01G098300 TraesCS7A01G183900 TraesCS7D01G424400 Triticum_aestivum_newGene_57886 Triticum_aestivum_newGene_56676 Triticum_aestivum_newGene_57885 TraesCS6A01G148100 TraesCS2B01G247100 TraesCS4A01G003800 Triticum_aestivum_newGene_24844 TraesCS7B01G260800 Triticum_aestivum_newGene_22787 TraesCS7D01G386600 TraesCS7A01…
32991	macromolecular complex	5.9768e-16	1.0841e-13	336/2105 15.9%	472/3886 12.1%	TraesCS7A01G119900 TraesCS7D01G488500 TraesCS6A01G061700 TraesCS7A01G465300 Triticum_aestivum_newGene_37599 TraesCS3B01G221400 TraesCS1D01G286600 TraesCS5A01G098300 TraesCS6A01G148100 TraesCS4A01G320200 TraesCS6B01G443800 TraesCS7B01G111000 TraesCS4A01G003800 Triticum_aestivum_newGene_24844 TraesCS2D01G459000 TraesCS1D01G366600 TraesCS2B01G411600 TraesCS7A01G239000 TraesCS7B01G019000 TraesCS2D01G…
6807	nitrogen compound metabolic process	6.5913e-16	1.1252e-13	366/2105 17.3%	521/3886 13.4%	TraesCS7D01G203800 TraesCS1D01G345100 TraesCS3B01G149800 TraesCS2B01G419200 TraesCS5A01G098300 TraesCS7A01G183900 TraesCS7D01G424400 Triticum_aestivum_newGene_57886 Triticum_aestivum_newGene_56676 Triticum_aestivum_newGene_57885 TraesCS6A01G148100 TraesCS2B01G247100 TraesCS4A01G003800 Triticum_aestivum_newGene_24844 TraesCS7B01G260800 Triticum_aestivum_newGene_22787 TraesCS7D01G386600 TraesCS7A01…
32993	protein-DNA complex	2.1276e-15	3.2836e-13	166/2105 7.8%	208/3886 5.3%	TraesCS7A01G119900 TraesCS7D01G488500 TraesCS6A01G061700 TraesCS6B01G079000 TraesCS1D01G286600 TraesCS1A01G361900 TraesCS5A01G098300 TraesCS1B01G301100 TraesCS5D01G478400 TraesCS1A01G228800 TraesCS1A01G295400 TraesCS6B01G443800 TraesCS4A01G003800 TraesCS7B01G016000 TraesCS2B01G415800 TraesCS1D01G366600 TraesCS2B01G411600 TraesCS6A01G117200 TraesCS4D01G205000 TraesCS7B01G019000 TraesCS5B01G243500 …
5634	nucleus	2.1499e-15	3.2836e-13	407/2105 19.3%	591/3886 15.2%	TraesCS6A01G061700 TraesCS1B01G254300 TraesCS7A01G465300 Triticum_aestivum_newGene_37599 TraesCS1D01G286600 TraesCS5A01G098300 TraesCS3A01G417300 TraesCS6A01G148100 TraesCS4A01G003800 TraesCS2D01G459000 TraesCS1D01G366600 TraesCS2B01G411600 TraesCS3D01G264700 TraesCS6A01G413400 TraesCS7D01G116600 TraesCS1D01G228700 Triticum_aestivum_newGene_9909 TraesCS4D01G167700 Triticum_aestivum_newGene_40746 …
65003	macromolecular complex assembly	4.9577e-15	7.1936e-13	199/2105 9.4%	259/3886 6.6%	TraesCS7A01G119900 TraesCS3D01G045500 TraesCS7D01G488500 TraesCS6A01G061700 TraesCS1D01G286600 TraesCS5A01G098300 TraesCS6B01G443800 TraesCS4A01G003800 TraesCS1D01G366600 TraesCS2B01G411600 TraesCS7A01G239000 TraesCS3D01G046700 TraesCS7B01G019000 TraesCS3D01G264700 TraesCS3D01G340800 TraesCS7D01G116600 TraesCS3D01G088900 TraesCSU01G182300 TraesCS5D01G110600 TraesCS2A01G469400 TraesCS6D01G040400 T…
5730	nucleolus	5.594e-15	7.7304e-13	118/2105 5.6%	139/3886 3.5%	TraesCS7D01G488500 Triticum_aestivum_newGene_52907 TraesCS6B01G079000 TraesCS1D01G286600 TraesCS5A01G098300 TraesCS1B01G301100 TraesCS7A01G369500 TraesCS7B01G390900 TraesCS6A01G148100 TraesCS1A01G295400 Triticum_aestivum_newGene_24844 TraesCS2D01G459000 TraesCS2B01G411600 TraesCS4D01G205000 TraesCS5B01G243500 TraesCS2D01G458700 Triticum_aestivum_newGene_43068 TraesCS3D01G340800 TraesCS4D01G345400…
6323	DNA packaging	7.4708e-15	9.8546e-13	167/2105 7.9%	211/3886 5.4%	TraesCS7A01G119900 TraesCS7D01G488500 TraesCS6A01G061700 TraesCS6B01G079000 TraesCS1D01G286600 TraesCS1A01G361900 TraesCS5A01G098300 TraesCS1B01G301100 TraesCS5D01G478400 TraesCS1A01G228800 TraesCS1A01G295400 TraesCS6B01G443800 TraesCS7B01G111000 TraesCS7B01G016000 TraesCS2B01G415800 TraesCS1D01G366600 TraesCS2B01G411600 TraesCS6A01G117200 TraesCS4D01G205000 TraesCS7B01G019000 TraesCS5B01G243500 …
71103	DNA conformation change	3.0947e-14	3.9048e-12	181/2105 8.5%	234/3886 6.0%	TraesCS7A01G119900 TraesCS7D01G488500 TraesCS6A01G061700 TraesCS6B01G079000 TraesCS1D01G286600 TraesCS1A01G361900 TraesCS5A01G098300 TraesCS1B01G301100 TraesCS5D01G478400 TraesCS1A01G228800 TraesCS1A01G295400 TraesCS6B01G443800 TraesCS7B01G111000 TraesCS7B01G016000 TraesCS2B01G415800 TraesCS1D01G366600 TraesCS2B01G411600 TraesCS6A01G117200 TraesCS4D01G205000 TraesCS7B01G019000 TraesCS5B01G243500 …
65004	protein-DNA complex assembly	3.8191e-14	4.6179e-12	159/2105 7.5%	201/3886 5.1%	TraesCS7A01G119900 TraesCS7D01G488500 TraesCS6A01G061700 TraesCS6B01G079000 TraesCS1D01G286600 TraesCS1A01G361900 TraesCS5A01G098300 TraesCS1B01G301100 TraesCS5D01G478400 TraesCS1A01G228800 TraesCS1A01G295400 TraesCS6B01G443800 TraesCS4A01G003800 TraesCS7B01G016000 TraesCS2B01G415800 TraesCS1D01G366600 TraesCS2B01G411600 TraesCS6A01G117200 TraesCS4D01G205000 TraesCS7B01G019000 TraesCS5B01G243500 …
90304	nucleic acid metabolic process	5.2698e-14	5.739e-12	268/2105 12.7%	371/3886 9.5%	TraesCS7D01G203800 TraesCS3B01G149800 TraesCS2B01G419200 TraesCS5A01G098300 TraesCS7D01G424400 Triticum_aestivum_newGene_56676 TraesCS6A01G148100 TraesCS2B01G247100 TraesCS4A01G003800 Triticum_aestivum_newGene_24844 Triticum_aestivum_newGene_22787 TraesCS4A01G020800 TraesCS2D01G458700 TraesCS6A01G413400 Triticum_aestivum_newGene_69196 TraesCS2A01G117000 Triticum_aestivum_newGene_33418 TraesCS1D01…
46982	protein heterodimerization activity	5.6479e-14	5.739e-12	152/2105 7.2%	191/3886 4.9%	TraesCS7A01G119900 TraesCS7D01G488500 TraesCS6A01G061700 TraesCS6B01G079000 TraesCS1D01G286600 TraesCS1A01G361900 TraesCS5A01G098300 TraesCS1B01G301100 TraesCS5D01G478400 TraesCS1A01G228800 TraesCS1A01G295400 TraesCS6B01G443800 TraesCS7B01G016000 TraesCS1D01G366600 TraesCS2B01G411600 TraesCS6A01G117200 TraesCS4D01G205000 TraesCS7B01G019000 TraesCS5B01G243500 TraesCS3D01G340800 TraesCS7D01G116600 …
22607	cellular component assembly	5.6606e-14	5.739e-12	209/2105 9.9%	278/3886 7.1%	TraesCS7A01G119900 TraesCS3D01G045500 TraesCS7D01G488500 TraesCS6A01G061700 TraesCS2D01G182400 TraesCS2A01G371200 TraesCS1D01G286600 TraesCS5A01G098300 TraesCS6B01G443800 TraesCS4A01G003800 TraesCS1D01G366600 TraesCS2B01G411600 TraesCS7A01G239000 TraesCS3D01G046700 TraesCS7B01G019000 TraesCS3D01G264700 TraesCS7A01G256800 TraesCS3D01G340800 TraesCS7D01G116600 TraesCS3D01G088900 TraesCSU01G182300 T…
785	chromatin	5.7149e-14	5.739e-12	160/2105 7.6%	203/3886 5.2%	TraesCS7A01G119900 TraesCS7D01G488500 TraesCS6A01G061700 TraesCS6B01G079000 TraesCS1D01G286600 TraesCS1A01G361900 TraesCS5A01G098300 TraesCS1B01G301100 TraesCS5D01G478400 TraesCS1A01G228800 TraesCS1A01G295400 TraesCS6B01G443800 Triticum_aestivum_newGene_24844 TraesCS7B01G016000 TraesCS2B01G415800 TraesCS1D01G366600 TraesCS2B01G411600 TraesCS6A01G117200 TraesCS4D01G205000 TraesCS7B01G019000 TraesC…
6333	chromatin assembly or disassembly	5.735e-14	5.739e-12	158/2105 7.5%	200/3886 5.1%	TraesCS7A01G119900 TraesCS7D01G488500 TraesCS6A01G061700 TraesCS1A01G380700 TraesCS6B01G079000 TraesCS1D01G286600 TraesCS1A01G361900 TraesCS5A01G098300 TraesCS1B01G301100 TraesCS5D01G478400 TraesCS1A01G228800 TraesCS1A01G295400 TraesCS6B01G443800 TraesCS7B01G016000 TraesCS1B01G403000 TraesCS2B01G415800 TraesCS1D01G366600 TraesCS2B01G411600 TraesCS6A01G117200 TraesCS4D01G205000 TraesCS7B01G019000 …
786	nucleosome	8.599e-14	8.3181e-12	157/2105 7.4%	199/3886 5.1%	TraesCS7A01G119900 TraesCS7D01G488500 TraesCS6A01G061700 TraesCS6B01G079000 TraesCS1D01G286600 TraesCS1A01G361900 TraesCS5A01G098300 TraesCS1B01G301100 TraesCS5D01G478400 TraesCS1A01G228800 TraesCS1A01G295400 TraesCS6B01G443800 TraesCS7B01G016000 TraesCS2B01G415800 TraesCS1D01G366600 TraesCS2B01G411600 TraesCS6A01G117200 TraesCS4D01G205000 TraesCS7B01G019000 TraesCS5B01G243500 TraesCS3D01G340800 …
44085	cellular component biogenesis	1.9148e-13	1.7451e-11	225/2105 10.6%	305/3886 7.8%	TraesCS7A01G119900 TraesCS3D01G045500 TraesCS7D01G488500 TraesCS6A01G061700 TraesCS2D01G182400 TraesCS2A01G371200 TraesCS1D01G286600 TraesCS5A01G098300 TraesCS6B01G443800 TraesCS4A01G003800 TraesCS1D01G366600 TraesCS2B01G411600 TraesCS7A01G239000 TraesCS3D01G046700 TraesCS7B01G019000 TraesCS3D01G264700 TraesCS7A01G256800 TraesCS3D01G340800 TraesCS2A01G117000 TraesCS7D01G116600 TraesCS3D01G088900 …
31497	chromatin assembly	1.9243e-13	1.7451e-11	155/2105 7.3%	197/3886 5.0%	TraesCS7A01G119900 TraesCS7D01G488500 TraesCS6A01G061700 TraesCS6B01G079000 TraesCS1D01G286600 TraesCS1A01G361900 TraesCS5A01G098300 TraesCS1B01G301100 TraesCS5D01G478400 TraesCS1A01G228800 TraesCS1A01G295400 TraesCS6B01G443800 TraesCS7B01G016000 TraesCS2B01G415800 TraesCS1D01G366600 TraesCS2B01G411600 TraesCS6A01G117200 TraesCS4D01G205000 TraesCS7B01G019000 TraesCS5B01G243500 TraesCS3D01G340800 …
34728	nucleosome organization	2.8719e-13	2.4512e-11	154/2105 7.3%	196/3886 5.0%	TraesCS7A01G119900 TraesCS7D01G488500 TraesCS6A01G061700 TraesCS6B01G079000 TraesCS1D01G286600 TraesCS1A01G361900 TraesCS5A01G098300 TraesCS1B01G301100 TraesCS5D01G478400 TraesCS1A01G228800 TraesCS1A01G295400 TraesCS6B01G443800 TraesCS7B01G016000 TraesCS2B01G415800 TraesCS1D01G366600 TraesCS2B01G411600 TraesCS6A01G117200 TraesCS4D01G205000 TraesCS7B01G019000 TraesCS5B01G243500 TraesCS3D01G340800 …
6334	nucleosome assembly	2.8719e-13	2.4512e-11	154/2105 7.3%	196/3886 5.0%	TraesCS7A01G119900 TraesCS7D01G488500 TraesCS6A01G061700 TraesCS6B01G079000 TraesCS1D01G286600 TraesCS1A01G361900 TraesCS5A01G098300 TraesCS1B01G301100 TraesCS5D01G478400 TraesCS1A01G228800 TraesCS1A01G295400 TraesCS6B01G443800 TraesCS7B01G016000 TraesCS2B01G415800 TraesCS1D01G366600 TraesCS2B01G411600 TraesCS6A01G117200 TraesCS4D01G205000 TraesCS7B01G019000 TraesCS5B01G243500 TraesCS3D01G340800 …
43933	macromolecular complex subunit organization	2.9657e-13	2.459e-11	199/2105 9.4%	265/3886 6.8%	TraesCS7A01G119900 TraesCS3D01G045500 TraesCS7D01G488500 TraesCS6A01G061700 TraesCS1D01G286600 TraesCS5A01G098300 TraesCS6B01G443800 TraesCS4A01G003800 TraesCS1D01G366600 TraesCS2B01G411600 TraesCS7A01G239000 TraesCS3D01G046700 TraesCS7B01G019000 TraesCS3D01G264700 TraesCS3D01G340800 TraesCS7D01G116600 TraesCS3D01G088900 TraesCSU01G182300 TraesCS5D01G110600 TraesCS2A01G469400 TraesCS6D01G040400 T…
6996	organelle organization	5.5103e-13	4.4419e-11	298/2105 14.1%	424/3886 10.9%	TraesCS7A01G119900 TraesCS7D01G488500 TraesCS7A01G354000 TraesCS6A01G061700 TraesCS3B01G149800 TraesCS2A01G371200 TraesCS6D01G151700 TraesCS1A01G380700 TraesCS1D01G286600 TraesCS5A01G098300 TraesCS3A01G417300 TraesCS6B01G443800 TraesCS7B01G111000 TraesCS2B01G247100 Triticum_aestivum_newGene_24844 Triticum_aestivum_newGene_57883 TraesCS1D01G366600 TraesCS2B01G411600 TraesCS7B01G019000 TraesCS3D01G…
10629	negative regulation of gene expression	4.0404e-12	3.169e-10	59/2105 2.8%	63/3886 1.6%	TraesCS3B01G307100 Triticum_aestivum_newGene_59141 TraesCS6D01G151700 TraesCS1A01G314000 TraesCS3B01G298900 TraesCS7D01G442100 TraesCS1A01G005700 TraesCS1B01G254900 TraesCS2D01G227600 TraesCS4D01G024300 TraesCS2B01G247100 TraesCS4A01G003800 TraesCS2B01G170200 TraesCS7D01G519000 TraesCS4D01G234700 TraesCS3D01G317400 TraesCS4B01G053600 TraesCS6B01G341400 TraesCS1B01G326400 TraesCS5D01G565400 TraesC…
34622	cellular macromolecular complex assembly	7.8807e-12	6.0184e-10	179/2105 8.5%	239/3886 6.1%	TraesCS7A01G119900 TraesCS4A01G101500 TraesCS7D01G488500 TraesCS6A01G061700 Triticum_aestivum_newGene_52907 TraesCS6B01G079000 TraesCS1D01G286600 TraesCS1A01G361900 TraesCS3B01G468900 TraesCS5A01G098300 TraesCS1B01G301100 TraesCS5D01G478400 TraesCS1A01G228800 TraesCS1B01G269400 TraesCS1A01G295400 TraesCS6B01G443800 TraesCS4A01G003800 TraesCS7B01G016000 TraesCS2B01G415800 TraesCS1D01G366600 TraesC…
10605	negative regulation of macromolecule metabolic process	8.2124e-12	6.1109e-10	61/2105 2.8%	66/3886 1.6%	TraesCS3B01G307100 Triticum_aestivum_newGene_59141 TraesCS6D01G151700 TraesCS1A01G314000 TraesCS3B01G298900 TraesCS7D01G442100 TraesCS1A01G005700 TraesCS1B01G254900 TraesCS2D01G227600 TraesCS4D01G024300 TraesCS2B01G247100 TraesCS4A01G003800 TraesCS4A01G263400 TraesCS2B01G170200 TraesCS4A01G020800 TraesCS7D01G519000 TraesCS4D01G234700 TraesCS3D01G317400 TraesCS4B01G053600 TraesCS6B01G341400 TraesC…
8283	cell proliferation	1.5106e-11	1.0959e-09	82/2105 3.8%	95/3886 2.4%	TraesCS7A01G119900 TraesCS3B01G307100 TraesCS5D01G194100 TraesCS3B01G298900 TraesCS7D01G442100 TraesCS1A01G361900 TraesCS4A01G057500 TraesCS1D01G261900 TraesCS4A01G030300 TraesCS1B01G378600 TraesCS5A01G098300 TraesCS1B01G376300 TraesCS1A01G228800 TraesCS3B01G410200 TraesCS7B01G018100 TraesCS7B01G016000 TraesCS1B01G376700 TraesCS1D01G366600 TraesCS6A01G360600 TraesCS7B01G019000 TraesCS2B01G363700 …
9892	negative regulation of metabolic process	4.3504e-11	3.0792e-09	61/2105 2.8%	67/3886 1.7%	TraesCS3B01G307100 Triticum_aestivum_newGene_59141 TraesCS6D01G151700 TraesCS1A01G314000 TraesCS3B01G298900 TraesCS7D01G442100 TraesCS1A01G005700 TraesCS1B01G254900 TraesCS2D01G227600 TraesCS4D01G024300 TraesCS2B01G247100 TraesCS4A01G003800 TraesCS4A01G263400 TraesCS2B01G170200 TraesCS4A01G020800 TraesCS7D01G519000 TraesCS4D01G234700 TraesCS3D01G317400 TraesCS4B01G053600 TraesCS6B01G341400 TraesC…
16458	gene silencing	6.5813e-11	4.5474e-09	54/2105 2.5%	58/3886 1.4%	TraesCS3B01G307100 Triticum_aestivum_newGene_59141 TraesCS6D01G151700 TraesCS1A01G314000 TraesCS3B01G298900 TraesCS7D01G442100 TraesCS1A01G005700 TraesCS1B01G254900 TraesCS2D01G227600 TraesCS4D01G024300 TraesCS2B01G247100 TraesCS4A01G003800 TraesCS2B01G170200 TraesCS7D01G519000 TraesCS4B01G053600 TraesCS6B01G341400 TraesCS1B01G326400 TraesCS5D01G565400 TraesCS7A01G002800 TraesCS5B01G470400 TraesC…
6261	DNA-dependent DNA replication	1.1918e-10	8.0435e-09	62/2105 2.9%	69/3886 1.7%	TraesCS4D01G044700 TraesCS3B01G307100 TraesCS7B01G230000 TraesCS7D01G442100 TraesCS2B01G473200 TraesCS1A01G005700 TraesCS4A01G003800 TraesCS5D01G021400 TraesCS4A01G020800 TraesCS6A01G360600 TraesCS2D01G097300 TraesCS3B01G312900 TraesCS6B01G341400 TraesCS1B01G326400 TraesCS7A01G213600 TraesCS5B01G470400 TraesCS3B01G098400 TraesCS4B01G301600 TraesCS2D01G163800 TraesCS2B01G265900 TraesCS5B01G013800 …
34621	cellular macromolecular complex subunit organization	2.8632e-10	1.8884e-08	179/2105 8.5%	245/3886 6.3%	TraesCS7A01G119900 TraesCS4A01G101500 TraesCS7D01G488500 TraesCS6A01G061700 Triticum_aestivum_newGene_52907 TraesCS6B01G079000 TraesCS1D01G286600 TraesCS1A01G361900 TraesCS3B01G468900 TraesCS5A01G098300 TraesCS1B01G301100 TraesCS5D01G478400 TraesCS1A01G228800 TraesCS1B01G269400 TraesCS1A01G295400 TraesCS6B01G443800 TraesCS4A01G003800 TraesCS7B01G016000 TraesCS2B01G415800 TraesCS1D01G366600 TraesC…
40029	regulation of gene expression, epigenetic	5.6065e-10	3.6156e-08	67/2105 3.1%	77/3886 1.9%	TraesCS3B01G307100 TraesCS6D01G151700 TraesCS2A01G235900 TraesCS1A01G314000 TraesCS3B01G298900 TraesCS7D01G442100 TraesCS1A01G005700 TraesCS1B01G254900 TraesCS2D01G227600 Triticum_aestivum_newGene_4312 TraesCS2B01G247100 TraesCS4A01G003800 TraesCS4A01G263400 TraesCS2B01G170200 TraesCS7D01G519000 TraesCS4D01G234700 TraesCS6A01G360600 TraesCS2B01G363700 TraesCS4B01G053600 TraesCS6B01G341400 TraesCS…
42542	response to hydrogen peroxide	7.8342e-10	4.9423e-08	34/2105 1.6%	34/3886 0.8%	TraesCS4A01G092700 TraesCS2B01G087400 TraesCS7B01G259000 TraesCS4D01G180800 TraesCS4D01G212500 TraesCS7A01G560200 TraesCS2B01G329900 TraesCS7A01G369500 TraesCS2D01G311400 TraesCS7A01G451100 TraesCS7B01G486500 TraesCS4B01G212300 TraesCS2B01G126800 TraesCS2D01G070500 TraesCS2D01G393800 Triticum_aestivum_newGene_20046 TraesCS7A01G202200 TraesCS4D01G322700 TraesCS4B01G197900 TraesCS7D01G353800 TraesC…
43414	macromolecule methylation	1.0913e-09	6.7381e-08	73/2105 3.4%	86/3886 2.2%	TraesCS2D01G560200 TraesCS3B01G307100 TraesCS6D01G151700 TraesCS2A01G235900 TraesCS1A01G314000 TraesCS3B01G298900 TraesCS7D01G442100 TraesCS1A01G005700 TraesCS5A01G098300 TraesCS2D01G227600 TraesCS5B01G260700 TraesCS7B01G390900 TraesCS7D01G474300 Triticum_aestivum_newGene_4312 TraesCS1A01G205200 TraesCS6A01G148100 TraesCS2B01G247100 TraesCS3D01G423300 TraesCS7D01G519000 TraesCS4D01G234700 TraesCS…
46983	protein dimerization activity	1.519e-09	9.1838e-08	167/2105 7.9%	229/3886 5.8%	TraesCS7A01G119900 TraesCS7D01G488500 TraesCS6A01G061700 TraesCS6B01G079000 TraesCS1D01G286600 TraesCS1A01G361900 TraesCS3A01G276500 TraesCS5B01G542300 TraesCS5A01G098300 TraesCS1B01G301100 TraesCS5D01G478400 TraesCS1A01G228800 TraesCS1A01G295400 TraesCS6B01G443800 TraesCS7B01G016000 TraesCS1D01G366600 TraesCS2B01G411600 TraesCS6A01G117200 TraesCS4D01G205000 Triticum_aestivum_newGene_39089 TraesC…
6260	DNA replication	2.513e-09	1.4883e-07	89/2105 4.2%	110/3886 2.8%	TraesCS4D01G044700 TraesCS3B01G307100 TraesCS2A01G103300 TraesCS3B01G315400 TraesCS3B01G298900 TraesCS7B01G230000 TraesCS7D01G442100 TraesCS2B01G473200 TraesCS1A01G005700 TraesCS7D01G130500 TraesCS2D01G227600 TraesCS4D01G246300 TraesCS2B01G247100 TraesCS4A01G003800 TraesCS1D01G139000 TraesCS5D01G021400 TraesCS4A01G020800 TraesCS6A01G360600 TraesCS2D01G097300 TraesCS3B01G312900 TraesCS4A01G058000 …
302	response to reactive oxygen species	7.239e-09	4.2015e-07	35/2105 1.6%	36/3886 0.9%	TraesCS4A01G092700 TraesCS2B01G087400 TraesCS7B01G259000 TraesCS6D01G164600 TraesCS4D01G180800 TraesCS4D01G212500 TraesCS7A01G560200 TraesCS2B01G329900 TraesCS7A01G369500 TraesCS2D01G311400 TraesCS7A01G451100 TraesCS7B01G486500 TraesCS4B01G212300 TraesCS2B01G126800 TraesCS2D01G070500 TraesCS2D01G393800 Triticum_aestivum_newGene_20046 TraesCS7A01G202200 TraesCS4D01G322700 TraesCS4B01G197900 TraesC…
44446	intracellular organelle part	7.7555e-09	4.413e-07	392/2105 18.6%	606/3886 15.5%	TraesCS6A01G061700 Triticum_aestivum_newGene_37599 TraesCS3B01G221400 TraesCS1D01G286600 TraesCS5A01G098300 TraesCS6A01G148100 TraesCS4A01G320200 TraesCS4A01G003800 TraesCS2D01G459000 TraesCS1D01G366600 TraesCS2B01G411600 TraesCS3D01G264700 TraesCS4B01G197900 TraesCS4A01G364000 TraesCS7D01G116600 TraesCS1D01G228700 TraesCS7B01G387900 Triticum_aestivum_newGene_9909 TraesCS4D01G167700 Triticum_aest…
48519	negative regulation of biological process	7.9512e-09	4.4374e-07	71/2105 3.3%	85/3886 2.1%	TraesCS3B01G307100 Triticum_aestivum_newGene_59141 TraesCS6D01G151700 TraesCS1D01G296600 TraesCS1A01G314000 TraesCS3B01G298900 TraesCS7D01G442100 TraesCS1A01G005700 TraesCS3B01G468900 TraesCS1B01G254900 TraesCS2D01G227600 TraesCS4D01G024300 TraesCS2B01G247100 TraesCS4A01G003800 TraesCS4A01G263400 TraesCS2B01G170200 TraesCS4A01G020800 TraesCS7D01G519000 TraesCS4D01G234700 TraesCS3D01G317400 TraesC…
6259	DNA metabolic process	1.1329e-08	6.2034e-07	159/2105 7.5%	220/3886 5.6%	TraesCS4D01G044700 TraesCS3B01G307100 Triticum_aestivum_newGene_22817 TraesCS2D01G329700 TraesCS2A01G235900 TraesCS3B01G315400 Triticum_aestivum_newGene_13547 TraesCS7D01G442100 TraesCS7D01G130500 Triticum_aestivum_newGene_54652 TraesCS7D01G424400 Triticum_aestivum_newGene_56676 TraesCS1D01G427800 TraesCS2B01G247100 TraesCS4A01G003800 Triticum_aestivum_newGene_24844 Triticum_aestivum_newGene_2278…
48580	regulation of post-embryonic development	1.3099e-08	7.0394e-07	34/2105 1.6%	35/3886 0.9%	TraesCS3B01G307100 TraesCS6A01G311200 TraesCS7B01G181200 TraesCS5A01G427500 TraesCS3B01G298900 TraesCS7D01G442100 TraesCS3D01G119400 TraesCS1A01G284300 TraesCS3D01G272800 TraesCS1A01G205200 TraesCS5A01G166800 TraesCS2D01G093700 TraesCS5B01G429500 TraesCS5B01G163900 TraesCS6D01G008000 TraesCS7B01G352800 TraesCS1A01G132400 TraesCS6A01G360600 TraesCS1B01G154500 TraesCS1D01G264100 TraesCS1A01G346500 …
44422	organelle part	1.4274e-08	7.5316e-07	392/2105 18.6%	608/3886 15.6%	TraesCS6A01G061700 Triticum_aestivum_newGene_37599 TraesCS3B01G221400 TraesCS1D01G286600 TraesCS5A01G098300 TraesCS6A01G148100 TraesCS4A01G320200 TraesCS4A01G003800 TraesCS2D01G459000 TraesCS1D01G366600 TraesCS2B01G411600 TraesCS3D01G264700 TraesCS4B01G197900 TraesCS4A01G364000 TraesCS7D01G116600 TraesCS1D01G228700 TraesCS7B01G387900 Triticum_aestivum_newGene_9909 TraesCS4D01G167700 Triticum_aest…
9909	regulation of flower development	2.3679e-08	1.2271e-06	33/2105 1.5%	34/3886 0.8%	TraesCS3B01G307100 TraesCS6A01G311200 TraesCS7B01G181200 TraesCS5A01G427500 TraesCS3B01G298900 TraesCS7D01G442100 TraesCS3D01G119400 TraesCS1A01G284300 TraesCS3D01G272800 TraesCS1A01G205200 TraesCS5A01G166800 TraesCS2D01G093700 TraesCS5B01G429500 TraesCS5B01G163900 TraesCS6D01G008000 TraesCS7B01G352800 TraesCS1A01G132400 TraesCS6A01G360600 TraesCS1B01G154500 TraesCS1D01G264100 TraesCS3B01G224600 …
60255	regulation of macromolecule metabolic process	3.6089e-08	1.8374e-06	196/2105 9.3%	282/3886 7.2%	Triticum_aestivum_newGene_59141 TraesCS1B01G254300 TraesCS6D01G151700 Triticum_aestivum_newGene_37599 TraesCS3A01G276500 TraesCS1D01G059200 TraesCS7A01G369500 TraesCS3A01G417300 TraesCS2B01G247100 TraesCS4A01G003800 Triticum_aestivum_newGene_24844 TraesCS4A01G020800 Triticum_aestivum_newGene_39089 TraesCS2B01G126800 TraesCS5A01G143200 TraesCS2D01G431000 TraesCS2D01G410400 TraesCS4B01G097500 Triti…
10468	regulation of gene expression	4.5434e-08	2.2359e-06	184/2105 8.7%	263/3886 6.7%	TraesCS1A01G429100 TraesCS3B01G307100 Triticum_aestivum_newGene_59141 TraesCS1B01G254300 TraesCS6D01G151700 Triticum_aestivum_newGene_37599 TraesCS2A01G235900 TraesCS1A01G314000 TraesCS7D01G442100 TraesCS3A01G276500 TraesCS2A01G413200 TraesCS1D01G059200 Triticum_aestivum_newGene_2206 TraesCS7A01G369500 TraesCS3B01G452200 TraesCS3A01G417300 TraesCS4D01G024300 TraesCS3B01G284700 TraesCS2B01G247100 …
16043	cellular component organization	4.5457e-08	2.2359e-06	357/2105 16.9%	552/3886 14.2%	TraesCS7A01G119900 TraesCS3D01G045500 TraesCS7D01G488500 TraesCS7A01G354000 TraesCS6A01G061700 TraesCS2D01G182400 TraesCS3B01G149800 TraesCS2A01G371200 TraesCS6D01G151700 TraesCS1A01G380700 TraesCS1D01G286600 TraesCS5A01G098300 TraesCS3A01G417300 TraesCS6B01G443800 TraesCS7B01G111000 TraesCS2B01G247100 TraesCS4A01G003800 Triticum_aestivum_newGene_24844 Triticum_aestivum_newGene_57883 TraesCS5D01G…
16887	ATPase activity	7.3207e-08	3.5408e-06	66/2105 3.1%	80/3886 2.0%	Triticum_aestivum_newGene_17984 TraesCS1D01G345100 TraesCS4D01G176300 TraesCSU01G122500 TraesCS2A01G103300 TraesCS5B01G397600 TraesCS7B01G271500 TraesCS2B01G473200 TraesCS1B01G254900 TraesCS3A01G117600 TraesCS7A01G183900 Triticum_aestivum_newGene_52359 TraesCS7B01G260800 TraesCS1D01G309600 TraesCS7D01G386600 TraesCS6A01G360600 TraesCSU01G014100 Triticum_aestivum_newGene_36891 TraesCS7D01G116000 T…
6270	DNA-dependent DNA replication initiation	1.9825e-07	9.4313e-06	33/2105 1.5%	35/3886 0.9%	TraesCS3B01G307100 TraesCS6A01G311200 TraesCS7B01G181200 TraesCS7D01G442100 TraesCS3D01G119400 TraesCS5A01G460600 TraesCS3D01G272800 TraesCS5A01G166800 TraesCS2D01G093700 TraesCS4A01G003800 TraesCS5B01G163900 TraesCS7B01G352800 TraesCS6A01G360600 TraesCS5D01G472300 TraesCS1D01G264100 TraesCS3B01G224600 TraesCS1A01G264000 TraesCS5D01G149500 TraesCS6B01G341400 TraesCS1B01G326400 TraesCS6D01G344100 …
45934	negative regulation of nucleobase, nucleoside, nucleotide and nucleic acid metabolic process	2.2387e-07	9.865e-06	39/2105 1.8%	43/3886 1.1%	TraesCS3B01G307100 TraesCS6A01G311200 TraesCS6D01G151700 TraesCS7B01G181200 TraesCS6B01G190300 TraesCS1A01G314000 TraesCS3B01G298900 TraesCS3D01G119400 TraesCS1A01G005700 TraesCS2D01G227600 TraesCS6A01G213300 TraesCS5A01G460600 TraesCS3D01G272800 TraesCS4D01G053600 TraesCS2D01G093700 TraesCS6A01G161200 TraesCS2A01G145200 TraesCS2B01G247100 TraesCS4A01G003800 TraesCS1D01G320300 TraesCS4A01G261000 …
51172	negative regulation of nitrogen compound metabolic process	2.2387e-07	9.865e-06	39/2105 1.8%	43/3886 1.1%	TraesCS3B01G307100 TraesCS6A01G311200 TraesCS6D01G151700 TraesCS7B01G181200 TraesCS6B01G190300 TraesCS1A01G314000 TraesCS3B01G298900 TraesCS3D01G119400 TraesCS1A01G005700 TraesCS2D01G227600 TraesCS6A01G213300 TraesCS5A01G460600 TraesCS3D01G272800 TraesCS4D01G053600 TraesCS2D01G093700 TraesCS6A01G161200 TraesCS2A01G145200 TraesCS2B01G247100 TraesCS4A01G003800 TraesCS1D01G320300 TraesCS4A01G261000 …
16481	negative regulation of transcription	2.2516e-07	9.865e-06	36/2105 1.7%	39/3886 1.0%	TraesCS3B01G307100 TraesCS6A01G311200 TraesCS6D01G151700 TraesCS7B01G181200 TraesCS6B01G190300 TraesCS1A01G314000 TraesCS3B01G298900 TraesCS1A01G005700 TraesCS2D01G227600 TraesCS6A01G213300 TraesCS5A01G460600 TraesCS3D01G272800 TraesCS4D01G053600 TraesCS2D01G093700 TraesCS6A01G161200 TraesCS2A01G145200 TraesCS2B01G247100 TraesCS4A01G003800 TraesCS1D01G320300 TraesCS4A01G261000 TraesCS2B01G170200 …
45892	negative regulation of transcription, DNA-dependent	2.2516e-07	9.865e-06	36/2105 1.7%	39/3886 1.0%	TraesCS3B01G307100 TraesCS6A01G311200 TraesCS6D01G151700 TraesCS7B01G181200 TraesCS6B01G190300 TraesCS1A01G314000 TraesCS3B01G298900 TraesCS1A01G005700 TraesCS2D01G227600 TraesCS6A01G213300 TraesCS5A01G460600 TraesCS3D01G272800 TraesCS4D01G053600 TraesCS2D01G093700 TraesCS6A01G161200 TraesCS2A01G145200 TraesCS2B01G247100 TraesCS4A01G003800 TraesCS1D01G320300 TraesCS4A01G261000 TraesCS2B01G170200 …
51253	negative regulation of RNA metabolic process	2.2516e-07	9.865e-06	36/2105 1.7%	39/3886 1.0%	TraesCS3B01G307100 TraesCS6A01G311200 TraesCS6D01G151700 TraesCS7B01G181200 TraesCS6B01G190300 TraesCS1A01G314000 TraesCS3B01G298900 TraesCS1A01G005700 TraesCS2D01G227600 TraesCS6A01G213300 TraesCS5A01G460600 TraesCS3D01G272800 TraesCS4D01G053600 TraesCS2D01G093700 TraesCS6A01G161200 TraesCS2A01G145200 TraesCS2B01G247100 TraesCS4A01G003800 TraesCS1D01G320300 TraesCS4A01G261000 TraesCS2B01G170200 …
6163	purine nucleotide metabolic process	2.2776e-07	9.865e-06	52/2105 2.4%	61/3886 1.5%	TraesCS3A01G322800 TraesCS3B01G307100 TraesCS1D01G345100 TraesCS5B01G397600 TraesCS7B01G271500 TraesCS5B01G024600 TraesCS3D01G308700 TraesCS3A01G117600 TraesCS7A01G183900 TraesCS1B01G269400 TraesCS7B01G260800 TraesCS1D01G309600 TraesCS1D01G194100 TraesCS7D01G386600 TraesCSU01G014100 TraesCS6D01G121200 TraesCS7D01G116000 TraesCS4B01G053600 TraesCS2B01G342100 TraesCS7D01G500200 TraesCS2A01G117000 T…
16569	covalent chromatin modification	2.6866e-07	1.1359e-05	63/2105 2.9%	77/3886 1.9%	TraesCS3B01G307100 TraesCS6D01G151700 TraesCS1A01G314000 TraesCS3B01G298900 TraesCS7D01G442100 TraesCS7D01G247700 TraesCS1A01G005700 TraesCS1A01G284300 TraesCS2D01G227600 Triticum_aestivum_newGene_4312 TraesCS1A01G205200 TraesCS2B01G247100 TraesCS4A01G263400 Triticum_aestivum_newGene_57883 TraesCS6A01G360600 Triticum_aestivum_newGene_18443 TraesCS2B01G363700 TraesCS4B01G053600 TraesCS7B01G142600 …
9259	ribonucleotide metabolic process	2.7008e-07	1.1359e-05	54/2105 2.5%	64/3886 1.6%	TraesCS3A01G322800 TraesCS3B01G307100 TraesCS1D01G345100 TraesCS5B01G397600 TraesCS7B01G271500 TraesCS5B01G024600 TraesCS3D01G308700 TraesCS7B01G274100 TraesCS3A01G117600 TraesCS7A01G183900 TraesCS1A01G205200 TraesCS1B01G269400 TraesCS7B01G260800 TraesCS1D01G309600 TraesCS1D01G194100 TraesCS7D01G386600 TraesCSU01G014100 TraesCS6D01G121200 TraesCS7D01G116000 TraesCS4B01G053600 TraesCS2B01G342100 T…
16568	chromatin modification	3.015e-07	1.2499e-05	67/2105 3.1%	83/3886 2.1%	TraesCS3B01G307100 TraesCS6D01G151700 TraesCS1A01G314000 TraesCS3B01G298900 TraesCS7D01G442100 TraesCS7D01G247700 TraesCS1A01G005700 TraesCS1A01G284300 TraesCS2D01G227600 Triticum_aestivum_newGene_4312 TraesCS1A01G205200 TraesCS2B01G247100 Triticum_aestivum_newGene_24844 TraesCS4A01G263400 Triticum_aestivum_newGene_57883 TraesCS4D01G234700 TraesCS6A01G360600 Triticum_aestivum_newGene_18443 TraesC…
9141	nucleoside triphosphate metabolic process	3.6328e-07	1.4642e-05	51/2105 2.4%	60/3886 1.5%	TraesCS3A01G322800 TraesCS3B01G307100 TraesCS1D01G345100 TraesCS5B01G397600 TraesCS7B01G271500 TraesCS7D01G130500 TraesCS3D01G308700 TraesCS3A01G117600 TraesCS7A01G183900 TraesCS1B01G269400 TraesCS7B01G260800 TraesCS1D01G309600 TraesCS1D01G194100 TraesCS5D01G021400 TraesCS7D01G386600 TraesCSU01G014100 TraesCS6D01G121200 TraesCS7D01G116000 TraesCS4B01G053600 TraesCS6A01G373000 TraesCS2B01G342100 T…
9150	purine ribonucleotide metabolic process	3.6328e-07	1.4642e-05	51/2105 2.4%	60/3886 1.5%	TraesCS3A01G322800 TraesCS3B01G307100 TraesCS1D01G345100 TraesCS5B01G397600 TraesCS7B01G271500 TraesCS5B01G024600 TraesCS3D01G308700 TraesCS3A01G117600 TraesCS7A01G183900 TraesCS1B01G269400 TraesCS7B01G260800 TraesCS1D01G309600 TraesCS1D01G194100 TraesCS7D01G386600 TraesCSU01G014100 TraesCS6D01G121200 TraesCS7D01G116000 TraesCS4B01G053600 TraesCS2B01G342100 TraesCS7D01G500200 TraesCS2A01G117000 T…
9059	macromolecule biosynthetic process	3.9563e-07	1.5515e-05	184/2105 8.7%	268/3886 6.8%	TraesCS7D01G203800 TraesCS7B01G219800 TraesCS4D01G044700 TraesCS3B01G307100 Triticum_aestivum_newGene_52907 TraesCS3B01G149800 TraesCS7A01G465300 TraesCS2B01G419200 TraesCS3B01G315400 TraesCS7D01G442100 TraesCS2D01G398600 TraesCS7D01G130500 TraesCS7B01G390900 TraesCS3A01G184000 TraesCS7A01G319000 TraesCS6A01G148100 TraesCS4A01G320200 TraesCS5B01G440000 TraesCS2B01G247100 TraesCS4A01G003800 TraesC…
34645	cellular macromolecule biosynthetic process	3.9563e-07	1.5515e-05	184/2105 8.7%	268/3886 6.8%	TraesCS7D01G203800 TraesCS7B01G219800 TraesCS4D01G044700 TraesCS3B01G307100 Triticum_aestivum_newGene_52907 TraesCS3B01G149800 TraesCS7A01G465300 TraesCS2B01G419200 TraesCS3B01G315400 TraesCS7D01G442100 TraesCS2D01G398600 TraesCS7D01G130500 TraesCS7B01G390900 TraesCS3A01G184000 TraesCS7A01G319000 TraesCS6A01G148100 TraesCS4A01G320200 TraesCS5B01G440000 TraesCS2B01G247100 TraesCS4A01G003800 TraesC…
42623	ATPase activity, coupled	4.8009e-07	1.8576e-05	48/2105 2.2%	56/3886 1.4%	Triticum_aestivum_newGene_17984 TraesCS4D01G176300 TraesCSU01G122500 TraesCS2A01G103300 TraesCS5B01G397600 TraesCS1B01G321200 TraesCS2A01G451900 TraesCS2D01G451700 TraesCSU01G122800 TraesCS2B01G473200 TraesCS3D01G119400 TraesCS1B01G254900 TraesCS3A01G117600 Triticum_aestivum_newGene_52359 TraesCS4D01G053600 TraesCS7D01G199800 Triticum_aestivum_newGene_61238 TraesCS1D01G309600 TraesCS4A01G261000 T…
31324	negative regulation of cellular metabolic process	5.6679e-07	2.1643e-05	40/2105 1.9%	45/3886 1.1%	TraesCS3B01G307100 TraesCS6A01G311200 TraesCS6D01G151700 TraesCS7B01G181200 TraesCS6B01G190300 TraesCS1A01G314000 TraesCS3B01G298900 TraesCS3D01G119400 TraesCS1A01G005700 TraesCS2D01G227600 TraesCS6A01G213300 TraesCS5A01G460600 TraesCS3D01G272800 TraesCS4D01G053600 TraesCS2D01G093700 TraesCS6A01G161200 TraesCS2A01G145200 TraesCS2B01G247100 TraesCS4A01G003800 TraesCS4A01G263400 TraesCS1D01G320300 …
31047	gene silencing by RNA	6.0993e-07	2.2921e-05	31/2105 1.4%	33/3886 0.8%	TraesCS3B01G307100 Triticum_aestivum_newGene_59141 TraesCS6A01G311200 TraesCS3B01G298900 TraesCS1B01G254900 TraesCS2D01G227600 TraesCS5A01G460600 TraesCS3D01G272800 TraesCS4D01G024300 TraesCS2D01G093700 TraesCS2A01G145200 TraesCS2B01G247100 TraesCS2B01G170200 TraesCS1A01G243400 TraesCS5D01G472300 TraesCS6B01G341400 TraesCS7A01G521000 TraesCS1B01G326400 TraesCS3A01G500600 TraesCS4B01G094600 TraesC…
9890	negative regulation of biosynthetic process	6.3939e-07	2.2921e-05	37/2105 1.7%	41/3886 1.0%	TraesCS3B01G307100 TraesCS6A01G311200 TraesCS6D01G151700 TraesCS7B01G181200 TraesCS6B01G190300 TraesCS1A01G314000 TraesCS3B01G298900 TraesCS1A01G005700 TraesCS2D01G227600 TraesCS6A01G213300 TraesCS5A01G460600 TraesCS3D01G272800 TraesCS4D01G053600 TraesCS2D01G093700 TraesCS6A01G161200 TraesCS2A01G145200 TraesCS2B01G247100 TraesCS4A01G003800 TraesCS1D01G320300 TraesCS4A01G261000 TraesCS2B01G170200 …
10558	negative regulation of macromolecule biosynthetic process	6.3939e-07	2.2921e-05	37/2105 1.7%	41/3886 1.0%	TraesCS3B01G307100 TraesCS6A01G311200 TraesCS6D01G151700 TraesCS7B01G181200 TraesCS6B01G190300 TraesCS1A01G314000 TraesCS3B01G298900 TraesCS1A01G005700 TraesCS2D01G227600 TraesCS6A01G213300 TraesCS5A01G460600 TraesCS3D01G272800 TraesCS4D01G053600 TraesCS2D01G093700 TraesCS6A01G161200 TraesCS2A01G145200 TraesCS2B01G247100 TraesCS4A01G003800 TraesCS1D01G320300 TraesCS4A01G261000 TraesCS2B01G170200 …
31327	negative regulation of cellular biosynthetic process	6.3939e-07	2.2921e-05	37/2105 1.7%	41/3886 1.0%	TraesCS3B01G307100 TraesCS6A01G311200 TraesCS6D01G151700 TraesCS7B01G181200 TraesCS6B01G190300 TraesCS1A01G314000 TraesCS3B01G298900 TraesCS1A01G005700 TraesCS2D01G227600 TraesCS6A01G213300 TraesCS5A01G460600 TraesCS3D01G272800 TraesCS4D01G053600 TraesCS2D01G093700 TraesCS6A01G161200 TraesCS2A01G145200 TraesCS2B01G247100 TraesCS4A01G003800 TraesCS1D01G320300 TraesCS4A01G261000 TraesCS2B01G170200 …
16070	RNA metabolic process	6.3977e-07	2.2921e-05	112/2105 5.3%	153/3886 3.9%	TraesCS7D01G203800 TraesCS4A01G101500 Triticum_aestivum_newGene_52907 TraesCS3B01G149800 TraesCS2B01G419200 TraesCS2D01G398600 TraesCS3B01G468900 TraesCS5A01G098300 TraesCS7B01G390900 TraesCS6A01G148100 TraesCS4A01G452600 TraesCS2A01G072400 TraesCS7A01G200500 Triticum_aestivum_newGene_18443 TraesCS2D01G458700 Triticum_aestivum_newGene_43068 TraesCS5A01G040700 TraesCS2A01G117000 TraesCS1B01G326400…
16817	hydrolase activity, acting on acid anhydrides	6.5296e-07	2.3108e-05	129/2105 6.1%	180/3886 4.6%	Triticum_aestivum_newGene_17984 TraesCS3B01G307100 TraesCS1D01G345100 TraesCS4D01G176300 TraesCSU01G122500 TraesCS2D01G329700 TraesCS3B01G315400 TraesCS3D01G228100 Triticum_aestivum_newGene_15965 TraesCS5A01G157200 TraesCS1A01G253600 TraesCS2D01G059100 TraesCS7A01G183900 Triticum_aestivum_newGene_52359 TraesCS1B01G269400 TraesCS7B01G260800 TraesCS1D01G194100 TraesCS7D01G386600 Triticum_aestivum_n…
45814	negative regulation of gene expression, epigenetic	6.6508e-07	2.3254e-05	34/2105 1.6%	37/3886 0.9%	TraesCS3B01G307100 TraesCS6A01G311200 TraesCS6D01G151700 TraesCS7B01G181200 TraesCS6B01G190300 TraesCS1A01G314000 TraesCS3B01G298900 TraesCS1A01G005700 TraesCS2D01G227600 TraesCS5A01G460600 TraesCS3D01G272800 TraesCS4D01G053600 TraesCS2D01G093700 TraesCS6A01G161200 TraesCS2A01G145200 TraesCS2B01G247100 TraesCS4A01G003800 TraesCS4A01G261000 TraesCS2B01G170200 TraesCS4D01G234700 TraesCS5D01G472300 …
9144	purine nucleoside triphosphate metabolic process	7.6957e-07	2.5968e-05	47/2105 2.2%	55/3886 1.4%	TraesCS7B01G292700 TraesCS3A01G322800 TraesCS3B01G307100 TraesCS1D01G345100 TraesCS5B01G397600 TraesCS1B01G321200 TraesCS7B01G271500 TraesCS4B01G117800 TraesCS3A01G232300 TraesCS3D01G308700 TraesCS3B01G322400 TraesCS3A01G117600 TraesCS7A01G183900 TraesCS3D01G272800 TraesCS1B01G269400 TraesCS4D01G053600 TraesCS7B01G260800 TraesCS1D01G309600 TraesCS1D01G345200 TraesCS1D01G194100 TraesCS4A01G261000 …
9199	ribonucleoside triphosphate metabolic process	7.6957e-07	2.5968e-05	47/2105 2.2%	55/3886 1.4%	TraesCS7B01G292700 TraesCS3A01G322800 TraesCS3B01G307100 TraesCS1D01G345100 TraesCS5B01G397600 TraesCS1B01G321200 TraesCS7B01G271500 TraesCS4B01G117800 TraesCS3A01G232300 TraesCS3D01G308700 TraesCS3B01G322400 TraesCS3A01G117600 TraesCS7A01G183900 TraesCS3D01G272800 TraesCS1B01G269400 TraesCS4D01G053600 TraesCS7B01G260800 TraesCS1D01G309600 TraesCS1D01G345200 TraesCS1D01G194100 TraesCS4A01G261000 …
9205	purine ribonucleoside triphosphate metabolic process	7.6957e-07	2.5968e-05	47/2105 2.2%	55/3886 1.4%	TraesCS7B01G292700 TraesCS3A01G322800 TraesCS3B01G307100 TraesCS1D01G345100 TraesCS5B01G397600 TraesCS1B01G321200 TraesCS7B01G271500 TraesCS4B01G117800 TraesCS3A01G232300 TraesCS3D01G308700 TraesCS3B01G322400 TraesCS3A01G117600 TraesCS7A01G183900 TraesCS3D01G272800 TraesCS1B01G269400 TraesCS4D01G053600 TraesCS7B01G260800 TraesCS1D01G309600 TraesCS1D01G345200 TraesCS1D01G194100 TraesCS4A01G261000 …
55086	nucleobase, nucleoside and nucleotide metabolic process	8.5209e-07	2.8423e-05	86/2105 4.0%	113/3886 2.9%	TraesCS3A01G322800 TraesCS3B01G307100 TraesCS1D01G345100 TraesCS6B01G352300 TraesCS5B01G397600 TraesCS7B01G271500 TraesCS5B01G024600 TraesCS7D01G130500 TraesCS3B01G468900 TraesCS2B01G297800 TraesCS3D01G308700 TraesCS7B01G274100 TraesCS3A01G117600 TraesCS7A01G183900 TraesCS1A01G205200 TraesCS2A01G280500 TraesCS1B01G269400 TraesCS7B01G486500 TraesCS7B01G260800 TraesCS1D01G309600 TraesCS1D01G194100 …
9408	response to heat	1.1805e-06	3.8929e-05	53/2105 2.5%	64/3886 1.6%	TraesCS4A01G092700 TraesCS2D01G600900 TraesCS4A01G092100 TraesCS6B01G346700 TraesCS4D01G180800 TraesCS2B01G297800 TraesCS7A01G369500 TraesCS7A01G451100 TraesCS2A01G280500 TraesCS7B01G111000 TraesCS4B01G212300 TraesCS2B01G126800 TraesCS4A01G066100 TraesCS7A01G202200 TraesCS4A01G068200 TraesCS4B01G197900 TraesCS6D01G295500 TraesCS4D01G213100 TraesCS4A01G106300 TraesCS4B01G208900 TraesCS6D01G169100 …
1510	RNA methylation	1.3199e-06	4.3036e-05	22/2105 1.0%	22/3886 0.5%	TraesCS6D01G008000 TraesCS2D01G458700 TraesCS7A01G487500 TraesCS3B01G124400 TraesCS2A01G458100 Triticum_aestivum_newGene_50537 Triticum_aestivum_newGene_46365 TraesCS1A01G227100 TraesCS1D01G228700 TraesCS5D01G269800 TraesCS5A01G098300 TraesCS5B01G260700 TraesCS7D01G474200 TraesCS7B01G390900 TraesCS7D01G474300 TraesCS1B01G241200 TraesCS4B01G052900 TraesCS1A01G205200 TraesCS5D01G110600 TraesCS6A01G…
46483	heterocycle metabolic process	1.3672e-06	4.4084e-05	92/2105 4.3%	123/3886 3.1%	TraesCS7B01G219800 TraesCS3A01G322800 TraesCS3B01G307100 TraesCS1D01G345100 TraesCS5B01G397600 TraesCS3B01G128700 TraesCS7B01G271500 TraesCS5B01G024600 TraesCS4A01G317900 TraesCS3B01G468900 TraesCS2B01G297800 TraesCS3D01G308700 TraesCS7B01G274100 TraesCS3A01G117600 TraesCS7A01G183900 TraesCS1A01G205200 Triticum_aestivum_newGene_57886 TraesCS7A01G319000 Triticum_aestivum_newGene_57885 TraesCS2A01G…
51567	histone H3-K9 methylation	1.5564e-06	4.9632e-05	38/2105 1.8%	43/3886 1.1%	TraesCS3B01G307100 TraesCS6A01G311200 TraesCS6D01G151700 TraesCS7B01G181200 TraesCS6B01G190300 TraesCS1A01G314000 TraesCS3B01G298900 TraesCS7D01G442100 TraesCS3D01G119400 TraesCS3D01G272800 Triticum_aestivum_newGene_4312 TraesCS5A01G166800 TraesCS2D01G093700 TraesCS6A01G161200 TraesCS5B01G163900 TraesCS7B01G352800 TraesCS6A01G360600 Triticum_aestivum_newGene_67675 TraesCS1D01G264100 TraesCS2B01G3…
16462	pyrophosphatase activity	1.603e-06	5.0022e-05	126/2105 5.9%	177/3886 4.5%	Triticum_aestivum_newGene_17984 TraesCS3B01G307100 TraesCS1D01G345100 TraesCS4D01G176300 TraesCSU01G122500 TraesCS2D01G329700 TraesCS3B01G315400 TraesCS3D01G228100 Triticum_aestivum_newGene_15965 TraesCS5A01G157200 TraesCS1A01G253600 TraesCS2D01G059100 TraesCS7A01G183900 Triticum_aestivum_newGene_52359 TraesCS1B01G269400 TraesCS7B01G260800 TraesCS1D01G194100 TraesCS7D01G386600 Triticum_aestivum_n…
16818	hydrolase activity, acting on acid anhydrides, in phosphorus-containing anhydrides	1.603e-06	5.0022e-05	126/2105 5.9%	177/3886 4.5%	Triticum_aestivum_newGene_17984 TraesCS3B01G307100 TraesCS1D01G345100 TraesCS4D01G176300 TraesCSU01G122500 TraesCS2D01G329700 TraesCS3B01G315400 TraesCS3D01G228100 Triticum_aestivum_newGene_15965 TraesCS5A01G157200 TraesCS1A01G253600 TraesCS2D01G059100 TraesCS7A01G183900 Triticum_aestivum_newGene_52359 TraesCS1B01G269400 TraesCS7B01G260800 TraesCS1D01G194100 TraesCS7D01G386600 Triticum_aestivum_n…
5515	protein binding	1.6977e-06	5.2411e-05	293/2105 13.9%	455/3886 11.7%	TraesCS7A01G119900 TraesCS7D01G488500 TraesCS6A01G061700 TraesCS2A01G371200 TraesCS1D01G286600 TraesCS3A01G276500 TraesCS5B01G542300 TraesCS5A01G098300 TraesCS7A01G369500 TraesCS7D01G424400 TraesCS6B01G443800 TraesCS1D01G366600 TraesCS2B01G411600 Triticum_aestivum_newGene_39089 TraesCS7B01G019000 TraesCS3D01G264700 TraesCS2D01G431000 TraesCS3D01G340800 TraesCS6A01G413400 TraesCS2A01G267200 TraesC…
9117	nucleotide metabolic process	1.7394e-06	5.258e-05	84/2105 3.9%	111/3886 2.8%	TraesCS3A01G322800 TraesCS3B01G307100 TraesCS1D01G345100 TraesCS6B01G352300 TraesCS5B01G397600 TraesCS7B01G271500 TraesCS5B01G024600 TraesCS7D01G130500 TraesCS3B01G468900 TraesCS2B01G297800 TraesCS3D01G308700 TraesCS7B01G274100 TraesCS3A01G117600 TraesCS7A01G183900 TraesCS1A01G205200 TraesCS2A01G280500 TraesCS1B01G269400 TraesCS7B01G486500 TraesCS7B01G260800 TraesCS1D01G309600 TraesCS1D01G194100 …
6753	nucleoside phosphate metabolic process	1.7394e-06	5.258e-05	84/2105 3.9%	111/3886 2.8%	TraesCS3A01G322800 TraesCS3B01G307100 TraesCS1D01G345100 TraesCS6B01G352300 TraesCS5B01G397600 TraesCS7B01G271500 TraesCS5B01G024600 TraesCS7D01G130500 TraesCS3B01G468900 TraesCS2B01G297800 TraesCS3D01G308700 TraesCS7B01G274100 TraesCS3A01G117600 TraesCS7A01G183900 TraesCS1A01G205200 TraesCS2A01G280500 TraesCS1B01G269400 TraesCS7B01G486500 TraesCS7B01G260800 TraesCS1D01G309600 TraesCS1D01G194100 …
6342	chromatin silencing	1.946e-06	5.5199e-05	32/2105 1.5%	35/3886 0.9%	TraesCS3B01G307100 TraesCS6A01G311200 TraesCS6D01G151700 TraesCS7B01G181200 TraesCS6B01G190300 TraesCS1A01G314000 TraesCS3B01G298900 TraesCS1A01G005700 TraesCS2D01G227600 TraesCS5A01G460600 TraesCS3D01G272800 TraesCS4D01G053600 TraesCS2D01G093700 TraesCS6A01G161200 TraesCS2A01G145200 TraesCS2B01G247100 TraesCS4A01G003800 TraesCS4A01G261000 TraesCS2B01G170200 TraesCS5D01G472300 TraesCS4B01G053600 …
9146	purine nucleoside triphosphate catabolic process	1.9592e-06	5.5199e-05	45/2105 2.1%	53/3886 1.3%	TraesCS7B01G292700 TraesCS3A01G322800 TraesCS3B01G307100 TraesCS1D01G345100 TraesCS5B01G397600 TraesCS1B01G321200 TraesCS7B01G271500 TraesCS4B01G117800 TraesCS3A01G232300 TraesCS3D01G308700 TraesCS3A01G117600 TraesCS7A01G183900 TraesCS3D01G272800 TraesCS1B01G269400 TraesCS4D01G053600 TraesCS7B01G260800 TraesCS1D01G309600 TraesCS1D01G345200 TraesCS1D01G194100 TraesCS4A01G261000 TraesCS7D01G386600 …
9154	purine ribonucleotide catabolic process	1.9592e-06	5.5199e-05	45/2105 2.1%	53/3886 1.3%	TraesCS7B01G292700 TraesCS3A01G322800 TraesCS3B01G307100 TraesCS1D01G345100 TraesCS5B01G397600 TraesCS1B01G321200 TraesCS7B01G271500 TraesCS4B01G117800 TraesCS3A01G232300 TraesCS3D01G308700 TraesCS3A01G117600 TraesCS7A01G183900 TraesCS3D01G272800 TraesCS1B01G269400 TraesCS4D01G053600 TraesCS7B01G260800 TraesCS1D01G309600 TraesCS1D01G345200 TraesCS1D01G194100 TraesCS4A01G261000 TraesCS7D01G386600 …
9203	ribonucleoside triphosphate catabolic process	1.9592e-06	5.5199e-05	45/2105 2.1%	53/3886 1.3%	TraesCS7B01G292700 TraesCS3A01G322800 TraesCS3B01G307100 TraesCS1D01G345100 TraesCS5B01G397600 TraesCS1B01G321200 TraesCS7B01G271500 TraesCS4B01G117800 TraesCS3A01G232300 TraesCS3D01G308700 TraesCS3A01G117600 TraesCS7A01G183900 TraesCS3D01G272800 TraesCS1B01G269400 TraesCS4D01G053600 TraesCS7B01G260800 TraesCS1D01G309600 TraesCS1D01G345200 TraesCS1D01G194100 TraesCS4A01G261000 TraesCS7D01G386600 …
9207	purine ribonucleoside triphosphate catabolic process	1.9592e-06	5.5199e-05	45/2105 2.1%	53/3886 1.3%	TraesCS7B01G292700 TraesCS3A01G322800 TraesCS3B01G307100 TraesCS1D01G345100 TraesCS5B01G397600 TraesCS1B01G321200 TraesCS7B01G271500 TraesCS4B01G117800 TraesCS3A01G232300 TraesCS3D01G308700 TraesCS3A01G117600 TraesCS7A01G183900 TraesCS3D01G272800 TraesCS1B01G269400 TraesCS4D01G053600 TraesCS7B01G260800 TraesCS1D01G309600 TraesCS1D01G345200 TraesCS1D01G194100 TraesCS4A01G261000 TraesCS7D01G386600 …
9261	ribonucleotide catabolic process	1.9592e-06	5.5199e-05	45/2105 2.1%	53/3886 1.3%	TraesCS7B01G292700 TraesCS3A01G322800 TraesCS3B01G307100 TraesCS1D01G345100 TraesCS5B01G397600 TraesCS1B01G321200 TraesCS7B01G271500 TraesCS4B01G117800 TraesCS3A01G232300 TraesCS3D01G308700 TraesCS3A01G117600 TraesCS7A01G183900 TraesCS3D01G272800 TraesCS1B01G269400 TraesCS4D01G053600 TraesCS7B01G260800 TraesCS1D01G309600 TraesCS1D01G345200 TraesCS1D01G194100 TraesCS4A01G261000 TraesCS7D01G386600 …
6195	purine nucleotide catabolic process	1.9592e-06	5.5199e-05	45/2105 2.1%	53/3886 1.3%	TraesCS7B01G292700 TraesCS3A01G322800 TraesCS3B01G307100 TraesCS1D01G345100 TraesCS5B01G397600 TraesCS1B01G321200 TraesCS7B01G271500 TraesCS4B01G117800 TraesCS3A01G232300 TraesCS3D01G308700 TraesCS3A01G117600 TraesCS7A01G183900 TraesCS3D01G272800 TraesCS1B01G269400 TraesCS4D01G053600 TraesCS7B01G260800 TraesCS1D01G309600 TraesCS1D01G345200 TraesCS1D01G194100 TraesCS4A01G261000 TraesCS7D01G386600 …
9266	response to temperature stimulus	2.0109e-06	5.6111e-05	78/2105 3.7%	102/3886 2.6%	TraesCS4A01G092700 TraesCS2D01G600900 TraesCS3D01G366500 TraesCS4A01G092100 TraesCS1D01G296600 TraesCS3D01G280400 TraesCS6B01G346700 TraesCS4D01G180800 TraesCS3B01G468900 TraesCS2B01G297800 TraesCS7A01G369500 TraesCS7A01G451100 TraesCS2A01G280500 TraesCS1A01G234600 TraesCS7B01G111000 TraesCS1A01G312700 TraesCS4B01G212300 TraesCS3B01G360500 TraesCS1A01G132400 TraesCS3A01G371800 TraesCS2B01G126800 …
17111	nucleoside-triphosphatase activity	2.1628e-06	5.9777e-05	120/2105 5.7%	168/3886 4.3%	Triticum_aestivum_newGene_17984 TraesCS3B01G307100 TraesCS1D01G345100 TraesCS4D01G176300 TraesCSU01G122500 TraesCS2D01G329700 TraesCS3B01G315400 TraesCS3D01G228100 Triticum_aestivum_newGene_15965 TraesCS5A01G157200 TraesCS2D01G059100 TraesCS7A01G183900 Triticum_aestivum_newGene_52359 TraesCS1B01G269400 TraesCS7B01G260800 TraesCS1D01G194100 TraesCS7D01G386600 Triticum_aestivum_newGene_36891 TraesC…
44270	cellular nitrogen compound catabolic process	2.2813e-06	6.2455e-05	47/2105 2.2%	56/3886 1.4%	TraesCS5A01G492200 TraesCS7B01G292700 TraesCS3A01G322800 TraesCS3B01G307100 TraesCS1D01G345100 TraesCS5B01G397600 TraesCS1B01G321200 TraesCS7B01G271500 TraesCS4B01G117800 TraesCS3A01G232300 TraesCS3D01G308700 TraesCS3A01G117600 TraesCS7A01G183900 TraesCS3D01G272800 TraesCS1B01G269400 TraesCS4D01G053600 TraesCS7B01G260800 TraesCS1D01G309600 TraesCS1D01G345200 TraesCS1D01G194100 TraesCS4A01G261000 …
10556	regulation of macromolecule biosynthetic process	2.4375e-06	6.6109e-05	163/2105 7.7%	238/3886 6.1%	TraesCS1A01G429100 TraesCS3B01G307100 TraesCS1B01G254300 TraesCS6D01G151700 Triticum_aestivum_newGene_37599 TraesCS1A01G314000 TraesCS7D01G442100 TraesCS3A01G276500 TraesCS2A01G413200 TraesCS1D01G059200 Triticum_aestivum_newGene_2206 TraesCS7A01G369500 TraesCS3B01G452200 TraesCS3A01G417300 TraesCS3B01G284700 TraesCS2B01G247100 TraesCS4A01G003800 Triticum_aestivum_newGene_24844 TraesCS4A01G020800 …
50896	response to stimulus	2.5084e-06	6.7403e-05	419/2105 19.9%	674/3886 17.3%	TraesCS3D01G045500 TraesCS3D01G366500 TraesCS4D01G180800 TraesCS3A01G417300 TraesCS5B01G060100 TraesCS5D01G411300 TraesCS3D01G046700 TraesCS3B01G360500 TraesCS2B01G126800 TraesCS3D01G264700 TraesCS3D01G239400 TraesCS4A01G068200 TraesCS4B01G197900 TraesCS6A01G413400 TraesCS1D01G379900 TraesCS4A01G364000 TraesCS2A01G312900 TraesCS4D01G167700 TraesCS3B01G130400 TraesCS5B01G199400 TraesCS2A01G461800 …
10467	gene expression	2.9002e-06	7.7215e-05	114/2105 5.4%	159/3886 4.0%	TraesCS7D01G203800 Triticum_aestivum_newGene_52907 TraesCS3B01G149800 TraesCS7A01G465300 TraesCS2B01G419200 TraesCS2D01G398600 TraesCS3B01G468900 TraesCS7B01G390900 TraesCS6A01G148100 TraesCS4A01G320200 TraesCS5B01G440000 TraesCS2D01G459000 TraesCS2A01G072400 TraesCS7A01G200500 Triticum_aestivum_newGene_18443 TraesCS2D01G458700 Triticum_aestivum_newGene_43068 TraesCS5A01G040700 TraesCS2A01G117000…
9451	RNA modification	3.0253e-06	7.9813e-05	34/2105 1.6%	38/3886 0.9%	TraesCS3B01G166200 TraesCS4A01G101500 TraesCS3B01G124400 TraesCS2A01G159500 Triticum_aestivum_newGene_46365 TraesCS5A01G098300 TraesCS5B01G260700 TraesCS7D01G474200 TraesCS7B01G390900 TraesCS7D01G474300 TraesCS1A01G205200 TraesCS6A01G148100 TraesCS5B01G439100 TraesCS3D01G423300 TraesCS6D01G008000 TraesCS2D01G458700 TraesCS7A01G487500 TraesCS2A01G458100 Triticum_aestivum_newGene_50537 TraesCS2A01G…
9889	regulation of biosynthetic process	4.2676e-06	0.00011157	167/2105 7.9%	246/3886 6.3%	TraesCS1A01G429100 TraesCS3B01G307100 TraesCS1B01G254300 TraesCS6D01G151700 Triticum_aestivum_newGene_37599 TraesCS1A01G314000 TraesCS7D01G442100 TraesCS3A01G276500 TraesCS2A01G413200 TraesCS1D01G059200 Triticum_aestivum_newGene_2206 TraesCS7A01G369500 TraesCS3B01G452200 TraesCS3A01G417300 TraesCS3B01G284700 TraesCS2B01G247100 TraesCS4A01G003800 Triticum_aestivum_newGene_24844 TraesCS4A01G020800 …
51052	regulation of DNA metabolic process	4.9227e-06	0.00012755	43/2105 2.0%	51/3886 1.3%	TraesCS3B01G307100 TraesCS2B01G261900 TraesCS6A01G311200 TraesCS6D01G151700 TraesCS7B01G181200 TraesCS6B01G190300 TraesCS7D01G442100 TraesCS3D01G119400 TraesCS6D01G357600 TraesCS1A01G284300 TraesCS6A01G213300 TraesCS5A01G460600 TraesCS3D01G272800 TraesCS5A01G166800 TraesCS4D01G053600 TraesCS2D01G093700 TraesCS6A01G161200 TraesCS5B01G163900 TraesCS4A01G261000 TraesCS4A01G020800 TraesCS7B01G352800 …
31326	regulation of cellular biosynthetic process	5.4776e-06	0.00013736	166/2105 7.8%	245/3886 6.3%	TraesCS1A01G429100 TraesCS3B01G307100 TraesCS1B01G254300 TraesCS6D01G151700 Triticum_aestivum_newGene_37599 TraesCS1A01G314000 TraesCS7D01G442100 TraesCS3A01G276500 TraesCS2A01G413200 TraesCS1D01G059200 Triticum_aestivum_newGene_2206 TraesCS7A01G369500 TraesCS3B01G452200 TraesCS3A01G417300 TraesCS3B01G284700 TraesCS2B01G247100 TraesCS4A01G003800 Triticum_aestivum_newGene_24844 TraesCS4A01G020800 …
9143	nucleoside triphosphate catabolic process	5.6058e-06	0.00013736	45/2105 2.1%	54/3886 1.3%	TraesCS7B01G292700 TraesCS3A01G322800 TraesCS3B01G307100 TraesCS1D01G345100 TraesCS5B01G397600 TraesCS1B01G321200 TraesCS7B01G271500 TraesCS4B01G117800 TraesCS3A01G232300 TraesCS3D01G308700 TraesCS3A01G117600 TraesCS7A01G183900 TraesCS3D01G272800 TraesCS1B01G269400 TraesCS4D01G053600 TraesCS7B01G260800 TraesCS1D01G309600 TraesCS1D01G345200 TraesCS1D01G194100 TraesCS4A01G261000 TraesCS7D01G386600 …
9166	nucleotide catabolic process	5.6058e-06	0.00013736	45/2105 2.1%	54/3886 1.3%	TraesCS7B01G292700 TraesCS3A01G322800 TraesCS3B01G307100 TraesCS1D01G345100 TraesCS5B01G397600 TraesCS1B01G321200 TraesCS7B01G271500 TraesCS4B01G117800 TraesCS3A01G232300 TraesCS3D01G308700 TraesCS3A01G117600 TraesCS7A01G183900 TraesCS3D01G272800 TraesCS1B01G269400 TraesCS4D01G053600 TraesCS7B01G260800 TraesCS1D01G309600 TraesCS1D01G345200 TraesCS1D01G194100 TraesCS4A01G261000 TraesCS7D01G386600 …
34655	nucleobase, nucleoside, nucleotide and nucleic acid catabolic process	5.6058e-06	0.00013736	45/2105 2.1%	54/3886 1.3%	TraesCS7B01G292700 TraesCS3A01G322800 TraesCS3B01G307100 TraesCS1D01G345100 TraesCS5B01G397600 TraesCS1B01G321200 TraesCS7B01G271500 TraesCS4B01G117800 TraesCS3A01G232300 TraesCS3D01G308700 TraesCS3A01G117600 TraesCS7A01G183900 TraesCS3D01G272800 TraesCS1B01G269400 TraesCS4D01G053600 TraesCS7B01G260800 TraesCS1D01G309600 TraesCS1D01G345200 TraesCS1D01G194100 TraesCS4A01G261000 TraesCS7D01G386600 …
34656	nucleobase, nucleoside and nucleotide catabolic process	5.6058e-06	0.00013736	45/2105 2.1%	54/3886 1.3%	TraesCS7B01G292700 TraesCS3A01G322800 TraesCS3B01G307100 TraesCS1D01G345100 TraesCS5B01G397600 TraesCS1B01G321200 TraesCS7B01G271500 TraesCS4B01G117800 TraesCS3A01G232300 TraesCS3D01G308700 TraesCS3A01G117600 TraesCS7A01G183900 TraesCS3D01G272800 TraesCS1B01G269400 TraesCS4D01G053600 TraesCS7B01G260800 TraesCS1D01G309600 TraesCS1D01G345200 TraesCS1D01G194100 TraesCS4A01G261000 TraesCS7D01G386600 …
48523	negative regulation of cellular process	5.6058e-06	0.00013736	45/2105 2.1%	54/3886 1.3%	TraesCS3B01G307100 TraesCS6A01G311200 TraesCS6D01G151700 TraesCS7B01G181200 TraesCS1D01G296600 TraesCS6B01G190300 TraesCS1A01G314000 TraesCS3B01G298900 TraesCS3D01G119400 TraesCS1A01G005700 TraesCS2D01G227600 TraesCS6A01G213300 TraesCS5A01G460600 TraesCS3D01G272800 TraesCS4D01G053600 TraesCS2D01G093700 TraesCS6A01G161200 TraesCS2A01G145200 TraesCS2B01G247100 TraesCS4A01G003800 TraesCS4A01G263400 …
228	nuclear chromosome	5.6328e-06	0.00013736	27/2105 1.2%	29/3886 0.7%	TraesCS2A01G157700 TraesCS2D01G329700 TraesCS3D01G119400 TraesCS4D01G246300 TraesCS1D01G427800 TraesCS4A01G003800 Triticum_aestivum_newGene_24844 TraesCS6A01G360600 TraesCS4A01G058000 TraesCS1D01G264100 TraesCS4B01G246900 TraesCS3B01G224600 TraesCS1A01G264000 TraesCS7A01G213600 TraesCS6D01G344100 TraesCS3A01G500600 TraesCS4D01G299900 TraesCS1B01G274600 TraesCS3B01G136600 TraesCS4D01G167700 TraesC…
6305	DNA alkylation	6.6548e-06	0.0001596	40/2105 1.9%	47/3886 1.2%	TraesCS3B01G307100 TraesCS6A01G311200 TraesCS7B01G181200 TraesCS2D01G241800 TraesCS2A01G235900 TraesCS3B01G298900 TraesCS7D01G442100 TraesCS3D01G119400 TraesCS1A01G005700 TraesCS3D01G272800 Triticum_aestivum_newGene_4312 TraesCS5A01G166800 TraesCS2D01G093700 TraesCS5B01G163900 TraesCS7D01G519000 TraesCS7B01G352800 TraesCS4D01G234700 TraesCS6A01G360600 Triticum_aestivum_newGene_67675 TraesCS1D01G2…
6306	DNA methylation	6.6548e-06	0.0001596	40/2105 1.9%	47/3886 1.2%	TraesCS3B01G307100 TraesCS6A01G311200 TraesCS7B01G181200 TraesCS2D01G241800 TraesCS2A01G235900 TraesCS3B01G298900 TraesCS7D01G442100 TraesCS3D01G119400 TraesCS1A01G005700 TraesCS3D01G272800 Triticum_aestivum_newGene_4312 TraesCS5A01G166800 TraesCS2D01G093700 TraesCS5B01G163900 TraesCS7D01G519000 TraesCS7B01G352800 TraesCS4D01G234700 TraesCS6A01G360600 Triticum_aestivum_newGene_67675 TraesCS1D01G2…
16571	histone methylation	7.7626e-06	0.00018465	42/2105 1.9%	50/3886 1.2%	TraesCS3B01G307100 TraesCS6A01G311200 TraesCS6D01G151700 TraesCS7B01G181200 TraesCS6B01G190300 TraesCS1A01G314000 TraesCS3B01G298900 TraesCS7D01G442100 TraesCS3D01G119400 TraesCS6A01G213300 TraesCS3D01G272800 Triticum_aestivum_newGene_4312 TraesCS1A01G205200 TraesCS5A01G166800 TraesCS2D01G093700 TraesCS6A01G161200 TraesCS5B01G163900 TraesCS6D01G008000 TraesCS7B01G352800 TraesCS6A01G360600 Triticu…
16570	histone modification	1.1257e-05	0.00026559	54/2105 2.5%	68/3886 1.7%	TraesCS3B01G307100 TraesCS6D01G151700 TraesCS1A01G314000 TraesCS3B01G298900 TraesCS7D01G442100 TraesCS7D01G247700 TraesCS1A01G005700 TraesCS1A01G284300 Triticum_aestivum_newGene_4312 TraesCS1A01G205200 Triticum_aestivum_newGene_57883 TraesCS6A01G360600 Triticum_aestivum_newGene_18443 TraesCS2B01G363700 TraesCS7B01G142600 TraesCS6B01G341400 TraesCS1B01G326400 TraesCS5D01G565400 Triticum_aestivum_n…
5773	vacuole	1.7647e-05	0.000413	124/2105 5.8%	179/3886 4.6%	TraesCS2D01G600900 TraesCS7A01G354000 TraesCS6A01G309300 TraesCS6A01G036100 TraesCS3B01G336100 TraesCS6B01G079000 TraesCS1D01G286600 TraesCS1D01G123700 TraesCS1B01G301100 TraesCS3D01G188000 TraesCS1A01G295400 TraesCS2B01G411600 TraesCS3B01G360500 Triticum_aestivum_newGene_36891 TraesCS3A01G510900 TraesCS3D01G264700 TraesCS7A01G357400 TraesCS3D01G340800 TraesCS1B01G249000 TraesCS3B01G093500 TraesC…
34968	histone lysine methylation	1.9089e-05	0.00044317	40/2105 1.9%	48/3886 1.2%	TraesCS3B01G307100 TraesCS6A01G311200 TraesCS6D01G151700 TraesCS7B01G181200 TraesCS6B01G190300 TraesCS1A01G314000 TraesCS3B01G298900 TraesCS7D01G442100 TraesCS3D01G119400 TraesCS3D01G272800 Triticum_aestivum_newGene_4312 TraesCS1A01G205200 TraesCS5A01G166800 TraesCS2D01G093700 TraesCS6A01G161200 TraesCS5B01G163900 TraesCS6D01G008000 TraesCS7B01G352800 TraesCS6A01G360600 Triticum_aestivum_newGene_…
46700	heterocycle catabolic process	2.4391e-05	0.00056177	48/2105 2.2%	60/3886 1.5%	TraesCS5A01G492200 TraesCS7B01G292700 TraesCS3A01G322800 TraesCS3B01G307100 TraesCS1D01G345100 TraesCS5B01G397600 TraesCS1B01G321200 TraesCS7B01G271500 TraesCS4B01G117800 TraesCS3A01G232300 TraesCS3D01G308700 TraesCS3A01G117600 TraesCS7A01G183900 TraesCS3D01G272800 TraesCS1B01G269400 TraesCS4D01G053600 TraesCS7B01G260800 TraesCS1D01G309600 TraesCS1D01G345200 TraesCS1D01G194100 TraesCS4A01G261000 …
32259	methylation	2.4752e-05	0.00056559	78/2105 3.7%	106/3886 2.7%	TraesCS2D01G560200 TraesCS3B01G307100 TraesCS3B01G275700 TraesCS6D01G151700 TraesCS2A01G235900 TraesCS1A01G314000 TraesCS3B01G298900 TraesCS7D01G442100 TraesCS1A01G005700 TraesCS5A01G098300 TraesCS2D01G227600 TraesCS5B01G260700 TraesCS7B01G390900 TraesCS7D01G474300 Triticum_aestivum_newGene_4312 TraesCS1A01G205200 TraesCS6A01G148100 TraesCS2B01G247100 TraesCS3D01G423300 TraesCS7D01G519000 TraesCS…
6275	regulation of DNA replication	2.6498e-05	0.00060075	37/2105 1.7%	44/3886 1.1%	TraesCS3B01G307100 TraesCS6A01G311200 TraesCS6D01G151700 TraesCS7B01G181200 TraesCS6B01G190300 TraesCS7D01G442100 TraesCS3D01G119400 TraesCS6D01G357600 TraesCS1A01G284300 TraesCS5A01G460600 TraesCS3D01G272800 TraesCS5A01G166800 TraesCS2D01G093700 TraesCS6A01G161200 TraesCS5B01G163900 TraesCS4A01G020800 TraesCS7B01G352800 TraesCS6A01G360600 TraesCS5D01G472300 TraesCS2A01G364000 TraesCS1D01G264100 …
44454	nuclear chromosome part	2.9086e-05	0.00065432	24/2105 1.1%	26/3886 0.6%	TraesCS2A01G157700 TraesCS6A01G360600 TraesCS4A01G058000 TraesCS1D01G264100 TraesCS4B01G246900 TraesCS2D01G329700 TraesCS3B01G224600 TraesCS1A01G264000 TraesCS7A01G213600 TraesCS6D01G344100 TraesCS3A01G500600 TraesCS4D01G246300 TraesCS4D01G299900 TraesCS1B01G274600 TraesCS4D01G167700 TraesCS2B01G183200 TraesCS4B01G301600 TraesCS3A01G097200 TraesCS4B01G024000 TraesCS2D01G163800 TraesCS4A01G003800 …
6457	protein folding	3.4385e-05	0.00076758	43/2105 2.0%	53/3886 1.3%	TraesCS7B01G259000 TraesCS7B01G080700 Triticum_aestivum_newGene_8212 Triticum_aestivum_newGene_14557 TraesCS5B01G509400 TraesCS4A01G409100 TraesCS2B01G329900 TraesCS7A01G369500 TraesCS2D01G311400 TraesCS7A01G451100 TraesCS4A01G270400 TraesCS1A01G205200 TraesCSU01G116400 TraesCS6D01G008000 TraesCS2B01G126800 TraesCS4B01G223100 TraesCS4A01G066100 TraesCS2D01G393800 TraesCS7A01G202200 TraesCS4A01G06…
6730	one-carbon metabolic process	3.6412e-05	0.00080663	82/2105 3.8%	113/3886 2.9%	TraesCS2D01G560200 TraesCS3B01G307100 TraesCS3B01G275700 TraesCS6D01G151700 TraesCS2A01G235900 TraesCS1A01G314000 TraesCS3B01G298900 TraesCS7D01G442100 TraesCS1A01G005700 TraesCS5A01G098300 TraesCS2D01G227600 TraesCS5B01G260700 TraesCS7B01G390900 TraesCS7D01G474300 Triticum_aestivum_newGene_4312 TraesCS1A01G205200 TraesCS6A01G148100 TraesCS2B01G247100 TraesCS3D01G423300 TraesCS7D01G519000 TraesCS…
6950	response to stress	3.9388e-05	0.00086594	296/2105 14.0%	472/3886 12.1%	TraesCS3D01G045500 TraesCS7A01G354000 TraesCS3D01G366500 TraesCS3D01G280400 TraesCS3B01G390700 TraesCS4D01G180800 TraesCS7A01G369500 TraesCS7B01G111000 Triticum_aestivum_newGene_24844 TraesCS4D01G206600 TraesCS2A01G076600 TraesCS3D01G046700 TraesCS4A01G020800 TraesCS3B01G360500 TraesCS2B01G126800 TraesCS5D01G237800 TraesCS2D01G431000 TraesCS3D01G239400 TraesCS4A01G068200 TraesCS4D01G322700 TraesC…
80090	regulation of primary metabolic process	4.0286e-05	0.00087902	177/2105 8.4%	269/3886 6.9%	TraesCS1A01G429100 TraesCS3B01G307100 TraesCS1B01G254300 TraesCS6D01G151700 Triticum_aestivum_newGene_37599 TraesCS1A01G314000 TraesCS7D01G442100 TraesCS3A01G276500 TraesCS2A01G413200 TraesCS3B01G468900 TraesCS1D01G059200 Triticum_aestivum_newGene_2206 TraesCS7A01G369500 TraesCS3B01G452200 TraesCS3A01G417300 TraesCS3B01G284700 TraesCS2B01G247100 TraesCS4A01G003800 Triticum_aestivum_newGene_24844 …
8094	DNA-dependent ATPase activity	4.6357e-05	0.0010039	20/2105 0.9%	21/3886 0.5%	TraesCS6A01G360600 TraesCS5B01G354900 TraesCS2A01G103300 TraesCS1D01G264100 TraesCS4B01G053600 TraesCS2A01G451900 TraesCS2D01G451700 TraesCS2B01G473200 TraesCS3D01G119400 TraesCS3B01G224600 TraesCS2B01G120600 TraesCS1A01G264000 TraesCS5D01G565400 TraesCS6D01G344100 TraesCS1B01G274600 TraesCS3B01G136600 TraesCS5B01G131900 TraesCS2D01G102800 TraesCS4D01G053600 TraesCS4A01G261000
5488	binding	4.7124e-05	0.001013	1112/2105 52.8%	1940/3886 49.9%	TraesCS6A01G061700 TraesCS4D01G176300 TraesCS1D01G286600 TraesCS5B01G542300 TraesCS6D01G076600 TraesCS7A01G533200 TraesCS5A01G098300 TraesCS1D01G225200 TraesCS3A01G417300 Triticum_aestivum_newGene_3263 TraesCS7B01G260800 TraesCS1D01G366600 TraesCS2B01G411600 TraesCS7B01G128000 TraesCS5A01G143200 TraesCS3D01G264700 Triticum_aestivum_newGene_6760 TraesCS4B01G197900 TraesCS1D01G379900 TraesCS7D01G11…
6304	DNA modification	4.9725e-05	0.001061	40/2105 1.9%	49/3886 1.2%	TraesCS3B01G307100 TraesCS6A01G311200 TraesCS7B01G181200 TraesCS2D01G241800 TraesCS2A01G235900 TraesCS3B01G298900 TraesCS7D01G442100 TraesCS3D01G119400 TraesCS1A01G005700 TraesCS3D01G272800 Triticum_aestivum_newGene_4312 TraesCS5A01G166800 TraesCS2D01G093700 TraesCS5B01G163900 TraesCS7D01G519000 TraesCS7B01G352800 TraesCS4D01G234700 TraesCS6A01G360600 Triticum_aestivum_newGene_67675 TraesCS1D01G2…
46034	ATP metabolic process	5.7461e-05	0.0012172	33/2105 1.5%	39/3886 1.0%	TraesCS7B01G292700 TraesCS1D01G345100 TraesCS5B01G397600 TraesCS1B01G321200 TraesCS7B01G271500 TraesCS3B01G322400 TraesCS3A01G117600 TraesCS7A01G183900 TraesCS4D01G053600 TraesCS7B01G260800 TraesCS1D01G309600 TraesCS1D01G345200 TraesCS4A01G261000 Triticum_aestivum_newGene_35196 TraesCS7D01G386600 TraesCS6A01G356100 TraesCS2A01G049700 TraesCSU01G014100 TraesCS7D01G116000 TraesCS4B01G053600 TraesCS…
9628	response to abiotic stimulus	6.6591e-05	0.0014003	151/2105 7.1%	227/3886 5.8%	TraesCS4A01G092700 TraesCS2D01G600900 TraesCS4D01G044700 TraesCS3D01G366500 TraesCS3D01G280400 TraesCS1A01G314000 TraesCS7B01G349100 TraesCS4D01G180800 TraesCS3B01G468900 TraesCS3B01G265500 TraesCS7A01G369500 TraesCS7B01G111000 Triticum_aestivum_newGene_24844 TraesCS5D01G411300 TraesCS2A01G076600 TraesCS4B01G212300 TraesCS3B01G360500 TraesCS3D01G130700 TraesCS2B01G126800 TraesCS4A01G058000 TraesC…
19219	regulation of nucleobase, nucleoside, nucleotide and nucleic acid metabolic process	7.3807e-05	0.0015409	158/2105 7.5%	239/3886 6.1%	TraesCS1A01G429100 TraesCS3B01G307100 TraesCS1B01G254300 TraesCS6D01G151700 Triticum_aestivum_newGene_37599 TraesCS1A01G314000 TraesCS7D01G442100 TraesCS3A01G276500 TraesCS2A01G413200 TraesCS1D01G059200 TraesCS7A01G369500 TraesCS3B01G452200 TraesCS3A01G417300 TraesCS3B01G284700 TraesCS2B01G247100 TraesCS4A01G003800 Triticum_aestivum_newGene_24844 TraesCS4A01G020800 Triticum_aestivum_newGene_39089…
8213	protein amino acid alkylation	8.0702e-05	0.0016585	43/2105 2.0%	54/3886 1.3%	TraesCS2D01G560200 TraesCS3B01G307100 TraesCS6A01G311200 TraesCS6D01G151700 TraesCS7B01G181200 TraesCS6B01G190300 TraesCS1A01G314000 TraesCS3B01G298900 TraesCS7D01G442100 TraesCS3D01G119400 TraesCS6A01G213300 TraesCS3D01G272800 Triticum_aestivum_newGene_4312 TraesCS1A01G205200 TraesCS5A01G166800 TraesCS2D01G093700 TraesCS6A01G161200 TraesCS5B01G163900 TraesCS6D01G008000 TraesCS7B01G352800 TraesCS…
6479	protein amino acid methylation	8.0702e-05	0.0016585	43/2105 2.0%	54/3886 1.3%	TraesCS2D01G560200 TraesCS3B01G307100 TraesCS6A01G311200 TraesCS6D01G151700 TraesCS7B01G181200 TraesCS6B01G190300 TraesCS1A01G314000 TraesCS3B01G298900 TraesCS7D01G442100 TraesCS3D01G119400 TraesCS6A01G213300 TraesCS3D01G272800 Triticum_aestivum_newGene_4312 TraesCS1A01G205200 TraesCS5A01G166800 TraesCS2D01G093700 TraesCS6A01G161200 TraesCS5B01G163900 TraesCS6D01G008000 TraesCS7B01G352800 TraesCS…
22403	cell cycle phase	8.1152e-05	0.0016585	45/2105 2.1%	57/3886 1.4%	TraesCS4D01G044700 TraesCS2B01G041500 TraesCS2B01G261900 TraesCS6A01G311200 TraesCS7B01G181200 Triticum_aestivum_newGene_69244 Triticum_aestivum_newGene_69245 TraesCS1A01G314000 TraesCS3B01G298900 TraesCS3D01G119400 TraesCS7D01G247700 TraesCS2D01G132100 TraesCS7D01G207100 TraesCS6A01G213300 TraesCS1A01G205200 TraesCS7A01G204000 TraesCS1D01G427800 TraesCS6A01G364300 TraesCS7B01G111000 TraesCS2D01G…
6310	DNA recombination	9.1688e-05	0.0018607	58/2105 2.7%	77/3886 1.9%	TraesCS2A01G103300 TraesCS7D01G442100 TraesCS1A01G005700 Triticum_aestivum_newGene_54652 TraesCS4D01G246300 Triticum_aestivum_newGene_56676 TraesCS1D01G427800 Triticum_aestivum_newGene_22787 Triticum_aestivum_newGene_16490 TraesCS3B01G423800 TraesCS4A01G058000 TraesCS2B01G363700 TraesCS4B01G246900 TraesCS6A01G413400 Triticum_aestivum_newGene_64262 TraesCS1B01G326400 Triticum_aestivum_newGene_3341…
6979	response to oxidative stress	9.7101e-05	0.0019569	56/2105 2.6%	74/3886 1.9%	TraesCS4A01G092700 TraesCS7A01G354000 TraesCS7D01G249200 TraesCS4D01G180800 TraesCS5B01G509400 TraesCS1A01G416700 TraesCS7A01G369500 TraesCS7A01G451100 TraesCS7A01G428400 TraesCS3A01G184000 TraesCS7B01G486500 TraesCS4B01G212300 TraesCS2B01G126800 TraesCS3A01G510900 Triticum_aestivum_newGene_20046 TraesCS7A01G202200 TraesCS7D01G464600 TraesCS4D01G322700 TraesCS4B01G197900 TraesCS5A01G424100 TraesC…
6974	response to DNA damage stimulus	0.00011548	0.0023111	48/2105 2.2%	62/3886 1.5%	TraesCS4D01G044700 TraesCS2B01G261900 TraesCS2A01G103300 TraesCS7D01G442100 TraesCS3D01G119400 TraesCS6D01G357600 TraesCS1A01G284300 TraesCS6A01G213300 TraesCS4D01G246300 TraesCS6A01G177000 TraesCS2B01G453300 Triticum_aestivum_newGene_57387 TraesCS1B01G225400 Triticum_aestivum_newGene_24844 TraesCS1A01G071500 TraesCS5A01G380800 TraesCS5D01G021400 TraesCS4A01G020800 TraesCS7B01G352800 TraesCS6B01G…
6396	RNA processing	0.00012011	0.0023875	44/2105 2.0%	56/3886 1.4%	TraesCS3B01G166200 TraesCS6A01G082300 Triticum_aestivum_newGene_52907 TraesCS3B01G124400 TraesCS3B01G298900 TraesCS2A01G451700 Triticum_aestivum_newGene_46365 TraesCS1B01G214700 TraesCS3B01G468900 TraesCS2B01G297800 TraesCS7A01G560200 TraesCS2A01G280500 TraesCS5B01G439100 TraesCS7B01G486500 TraesCS2D01G279300 TraesCS2B01G469100 TraesCS3D01G423300 TraesCS2D01G187900 TraesCS1B01G072200 TraesCS2A01G…
5829	cytosol	0.00012367	0.0024413	83/2105 3.9%	117/3886 3.0%	Triticum_aestivum_newGene_52907 TraesCS6B01G352300 TraesCS7D01G249200 TraesCSU01G021600 TraesCS6B01G178600 TraesCS4D01G103000 TraesCS5B01G542300 TraesCS5B01G260700 TraesCS7B01G390900 TraesCS7D01G474300 TraesCS3B01G452200 TraesCS3A01G184000 TraesCS2B01G436700 TraesCS1A01G205200 TraesCS6B01G384500 TraesCS3A01G417300 TraesCS7B01G314600 TraesCS6A01G148100 TraesCS2D01G459200 TraesCS2D01G459000 TraesCS…
6200	ATP catabolic process	0.00014314	0.0028067	31/2105 1.4%	37/3886 0.9%	TraesCS7B01G292700 TraesCS1D01G345100 TraesCS5B01G397600 TraesCS1B01G321200 TraesCS7B01G271500 TraesCS3A01G117600 TraesCS7A01G183900 TraesCS4D01G053600 TraesCS7B01G260800 TraesCS1D01G309600 TraesCS1D01G345200 TraesCS4A01G261000 TraesCS7D01G386600 TraesCS6A01G356100 TraesCS2A01G049700 TraesCSU01G014100 TraesCS7D01G116000 TraesCS4B01G053600 TraesCS2B01G342100 TraesCS7D01G500200 TraesCS5A01G447200 T…
7049	cell cycle	0.00014992	0.00292	74/2105 3.5%	103/3886 2.6%	TraesCS4D01G044700 TraesCS3B01G307100 TraesCS2B01G041500 TraesCS1A01G314000 TraesCS3B01G298900 TraesCS7D01G247700 TraesCS2D01G132100 TraesCS1A01G005700 TraesCS2D01G227600 Triticum_aestivum_newGene_4312 TraesCS1A01G205200 TraesCS1D01G427800 TraesCS7B01G111000 TraesCS2B01G247100 TraesCS3D01G373800 TraesCS2B01G170200 TraesCS4A01G020800 TraesCS6A01G360600 TraesCS3A01G178900 Triticum_aestivum_newGene_…
51726	regulation of cell cycle	0.00017697	0.0034239	43/2105 2.0%	55/3886 1.4%	TraesCS3B01G307100 TraesCS6A01G311200 TraesCS6D01G151700 TraesCS7B01G181200 TraesCS6B01G190300 TraesCS7D01G442100 TraesCS3D01G119400 TraesCS7D01G247700 TraesCS1A01G284300 TraesCS5D01G121100 TraesCS5A01G460600 TraesCS3D01G272800 TraesCS5A01G166800 TraesCS2D01G093700 TraesCS6A01G161200 TraesCS5B01G163900 TraesCS7B01G352800 TraesCS6A01G360600 TraesCS5D01G472300 TraesCS2A01G404800 TraesCS7A01G248700 …
22402	cell cycle process	0.00018759	0.0036051	63/2105 2.9%	86/3886 2.2%	TraesCS4D01G044700 TraesCS3B01G307100 TraesCS2B01G041500 TraesCS1A01G314000 TraesCS3B01G298900 TraesCS7D01G247700 TraesCS2D01G132100 TraesCS1A01G205200 TraesCS1D01G427800 TraesCS7B01G111000 TraesCS3D01G373800 TraesCS2B01G170200 TraesCS6A01G360600 TraesCS3A01G178900 TraesCS3D01G264700 TraesCS3B01G423800 TraesCS2B01G342100 Triticum_aestivum_newGene_64262 TraesCS7B01G142600 TraesCS6B01G341400 TraesC…
51171	regulation of nitrogen compound metabolic process	0.00019233	0.003672	158/2105 7.5%	242/3886 6.2%	TraesCS1A01G429100 TraesCS3B01G307100 TraesCS1B01G254300 TraesCS6D01G151700 Triticum_aestivum_newGene_37599 TraesCS1A01G314000 TraesCS7D01G442100 TraesCS3A01G276500 TraesCS2A01G413200 TraesCS1D01G059200 TraesCS7A01G369500 TraesCS3B01G452200 TraesCS3A01G417300 TraesCS3B01G284700 TraesCS2B01G247100 TraesCS4A01G003800 Triticum_aestivum_newGene_24844 TraesCS4A01G020800 Triticum_aestivum_newGene_39089…
10389	regulation of G2/M transition of mitotic cell cycle	0.00021021	0.0039612	23/2105 1.0%	26/3886 0.6%	TraesCS7B01G352800 TraesCS6A01G360600 TraesCS3B01G307100 TraesCS6A01G311200 TraesCS6D01G151700 TraesCS7A01G248700 TraesCS6B01G190300 TraesCS7D01G442100 TraesCS3D01G119400 TraesCS7D01G247700 TraesCS7B01G142600 TraesCS6B01G341400 TraesCS1A01G284300 TraesCS1B01G326400 TraesCS6D01G344100 TraesCS3D01G272800 TraesCS3B01G136600 TraesCS6D01G290500 TraesCS5A01G166800 TraesCS2D01G093700 TraesCS6A01G161200 …
44445	cytosolic part	0.00021021	0.0039612	23/2105 1.0%	26/3886 0.6%	TraesCS2D01G458700 TraesCS7A01G487500 TraesCS2D01G474700 Triticum_aestivum_newGene_29183 TraesCS2A01G458100 TraesCS1A01G227100 TraesCS1D01G228700 TraesCS5D01G269800 TraesCS5B01G260700 TraesCS2B01G430100 TraesCS7D01G474200 TraesCS7B01G390900 TraesCS7D01G474300 TraesCS1B01G241200 TraesCS7D01G071200 TraesCS2B01G480600 TraesCS6A01G148100 TraesCS7D01G454100 TraesCS2D01G459200 TraesCS7A01G075600 TraesC…
45449	regulation of transcription	0.00023354	0.0043168	135/2105 6.4%	204/3886 5.2%	TraesCS1A01G429100 TraesCS3B01G307100 TraesCS1B01G254300 TraesCS6D01G151700 Triticum_aestivum_newGene_37599 TraesCS1A01G314000 TraesCS3A01G276500 TraesCS2A01G413200 TraesCS1D01G059200 TraesCS7A01G369500 TraesCS3B01G452200 TraesCS3A01G417300 TraesCS3B01G284700 TraesCS2B01G247100 TraesCS4A01G003800 Triticum_aestivum_newGene_24844 Triticum_aestivum_newGene_39089 TraesCS2B01G126800 TraesCS5A01G143200…
51252	regulation of RNA metabolic process	0.00023354	0.0043168	135/2105 6.4%	204/3886 5.2%	TraesCS1A01G429100 TraesCS3B01G307100 TraesCS1B01G254300 TraesCS6D01G151700 Triticum_aestivum_newGene_37599 TraesCS1A01G314000 TraesCS3A01G276500 TraesCS2A01G413200 TraesCS1D01G059200 TraesCS7A01G369500 TraesCS3B01G452200 TraesCS3A01G417300 TraesCS3B01G284700 TraesCS2B01G247100 TraesCS4A01G003800 Triticum_aestivum_newGene_24844 Triticum_aestivum_newGene_39089 TraesCS2B01G126800 TraesCS5A01G143200…
6355	regulation of transcription, DNA-dependent	0.00023354	0.0043168	135/2105 6.4%	204/3886 5.2%	TraesCS1A01G429100 TraesCS3B01G307100 TraesCS1B01G254300 TraesCS6D01G151700 Triticum_aestivum_newGene_37599 TraesCS1A01G314000 TraesCS3A01G276500 TraesCS2A01G413200 TraesCS1D01G059200 TraesCS7A01G369500 TraesCS3B01G452200 TraesCS3A01G417300 TraesCS3B01G284700 TraesCS2B01G247100 TraesCS4A01G003800 Triticum_aestivum_newGene_24844 Triticum_aestivum_newGene_39089 TraesCS2B01G126800 TraesCS5A01G143200…
9579	thylakoid	0.00023683	0.0043498	64/2105 3.0%	88/3886 2.2%	TraesCS4A01G101500 TraesCS6B01G079000 TraesCS1D01G286600 TraesCS4B01G222300 TraesCS2B01G553600 TraesCS3B01G468900 TraesCS2B01G297800 TraesCS1B01G301100 TraesCS1A01G360100 TraesCS2B01G436700 TraesCS4A01G270400 TraesCS2A01G280500 TraesCS4A01G320200 TraesCS1A01G295400 TraesCS5B01G215500 TraesCS7B01G486500 TraesCS5D01G224000 TraesCS2B01G469100 TraesCS3D01G186300 TraesCS2A01G072400 TraesCS2B01G411600 …
278	mitotic cell cycle	0.00024376	0.0044489	32/2105 1.5%	39/3886 1.0%	TraesCS6A01G311200 TraesCS7B01G181200 TraesCS1A01G314000 TraesCS3B01G298900 TraesCS3D01G119400 TraesCS7D01G247700 TraesCS2D01G132100 TraesCS7D01G207100 TraesCS6A01G213300 TraesCS1A01G205200 TraesCS7A01G204000 TraesCS7B01G111000 TraesCS3D01G373800 TraesCS6D01G008000 TraesCS2A01G404800 TraesCS3B01G423800 TraesCS7A01G248700 Triticum_aestivum_newGene_64262 TraesCS7B01G142600 TraesCS6B01G341400 TraesC…
9314	response to radiation	0.0002453	0.004449	69/2105 3.2%	96/3886 2.4%	TraesCS4D01G044700 TraesCS3D01G366500 TraesCS1A01G314000 TraesCS7B01G349100 TraesCS4D01G180800 TraesCS4B01G261900 TraesCS3B01G468900 TraesCS2B01G297800 TraesCS7A01G369500 TraesCS7A01G451100 TraesCS4D01G246300 TraesCS1A01G205200 TraesCS2A01G280500 TraesCS7B01G486500 Triticum_aestivum_newGene_24844 TraesCS5D01G411300 TraesCS3D01G186300 TraesCS7D01G233300 TraesCS6A01G255800 TraesCS2B01G126800 TraesC…
19222	regulation of metabolic process	0.00025304	0.004561	208/2105 9.8%	328/3886 8.4%	Triticum_aestivum_newGene_59141 TraesCS1B01G254300 TraesCS6D01G151700 Triticum_aestivum_newGene_37599 TraesCS3A01G276500 TraesCS1D01G059200 TraesCS7A01G369500 TraesCS3A01G417300 TraesCS2B01G247100 TraesCS4A01G003800 Triticum_aestivum_newGene_24844 TraesCS4A01G020800 Triticum_aestivum_newGene_39089 TraesCS2B01G126800 TraesCS5A01G143200 TraesCS2D01G431000 TraesCS2D01G410400 TraesCS4B01G097500 Triti…
22625	cytosolic large ribosomal subunit	0.00025502	0.0045683	17/2105 0.8%	18/3886 0.4%	TraesCS2D01G458700 TraesCS7A01G487500 TraesCS2D01G474700 TraesCS2A01G458100 TraesCS1A01G227100 TraesCS1D01G228700 TraesCS5D01G269800 TraesCS5B01G260700 TraesCS7D01G474200 TraesCS7B01G390900 TraesCS7D01G474300 TraesCS1B01G241200 TraesCS2B01G480600 TraesCS6A01G148100 TraesCS7D01G454100 TraesCS2D01G459200 TraesCS2D01G459000
30529	ribonucleoprotein complex	0.00031298	0.0055601	49/2105 2.3%	65/3886 1.6%	Triticum_aestivum_newGene_44128 TraesCS3A01G322800 Triticum_aestivum_newGene_52907 TraesCS7A01G465300 Triticum_aestivum_newGene_70419 TraesCS3D01G308700 TraesCS5B01G260700 TraesCS7B01G390900 TraesCS7D01G474300 TraesCS6A01G148100 TraesCS4A01G320200 TraesCS2D01G459200 TraesCS2D01G459000 Triticum_aestivum_newGene_34042 TraesCS2D01G458700 Triticum_aestivum_newGene_43068 TraesCS4D01G322700 TraesCS3D01…
34654	nucleobase, nucleoside, nucleotide and nucleic acid biosynthetic process	0.00031421	0.0055601	27/2105 1.2%	32/3886 0.8%	TraesCS3A01G236700 TraesCS6B01G352300 Triticum_aestivum_newGene_771 TraesCS4D01G363700 TraesCS5D01G033200 TraesCS4B01G373600 TraesCS5B01G024600 TraesCS7D01G130500 TraesCS7B01G274100 TraesCS3B01G322400 TraesCS1A01G205200 TraesCSU01G116400 TraesCS3A01G222100 Triticum_aestivum_newGene_35196 TraesCS5D01G021400 TraesCS6D01G008000 TraesCS1D01G264100 TraesCS6A01G373000 TraesCS3B01G224600 TraesCS6B01G246…
51716	cellular response to stimulus	0.00032883	0.0057835	129/2105 6.1%	195/3886 5.0%	TraesCS4D01G044700 TraesCS3D01G366500 TraesCS7D01G442100 TraesCS3A01G276500 TraesCS3B01G468900 TraesCS1D01G123700 TraesCS7A01G369500 TraesCS3B01G452200 TraesCS3A01G417300 TraesCS5B01G060100 TraesCS5B01G444600 Triticum_aestivum_newGene_24844 TraesCS5D01G411300 TraesCS4A01G020800 TraesCS4A01G058000 TraesCS5D01G237800 TraesCS3D01G239400 TraesCS4D01G322700 TraesCS4B01G197900 TraesCS6A01G413400 TraesC…
51259	protein oligomerization	0.00033989	0.0059064	13/2105 0.6%	13/3886 0.3%	TraesCS3D01G045500 TraesCS3D01G046700 TraesCS3D01G046600 TraesCS3D01G045600 TraesCS3D01G045700 TraesCS3D01G046800 TraesCS3D01G045800 TraesCS3D01G046300 TraesCSU01G047300 TraesCS3A01G034500 TraesCS3A01G034000 TraesCS3B01G049900 TraesCS3B01G049800
51260	protein homooligomerization	0.00033989	0.0059064	13/2105 0.6%	13/3886 0.3%	TraesCS3D01G045500 TraesCS3D01G046700 TraesCS3D01G046600 TraesCS3D01G045600 TraesCS3D01G045700 TraesCS3D01G046800 TraesCS3D01G045800 TraesCS3D01G046300 TraesCSU01G047300 TraesCS3A01G034500 TraesCS3A01G034000 TraesCS3B01G049900 TraesCS3B01G049800
22626	cytosolic ribosome	0.00034697	0.0059936	22/2105 1.0%	25/3886 0.6%	TraesCS2D01G458700 TraesCS7A01G487500 TraesCS4D01G322700 TraesCS2D01G474700 Triticum_aestivum_newGene_29183 TraesCS2A01G458100 TraesCS1A01G227100 TraesCS1D01G228700 TraesCS5D01G269800 TraesCS4A01G409100 TraesCS5B01G260700 TraesCS2B01G430100 TraesCS7D01G474200 TraesCS7B01G390900 TraesCS7D01G474300 TraesCS1B01G241200 TraesCS2B01G480600 TraesCS6A01G148100 TraesCS7D01G454100 TraesCS2D01G459200 TraesC…
279	M phase	0.00037873	0.0065035	41/2105 1.9%	53/3886 1.3%	TraesCS4D01G044700 TraesCS2B01G041500 TraesCS2B01G261900 TraesCS6A01G311200 TraesCS7B01G181200 Triticum_aestivum_newGene_69244 Triticum_aestivum_newGene_69245 TraesCS3B01G298900 TraesCS3D01G119400 TraesCS7D01G247700 TraesCS2D01G132100 TraesCS7D01G207100 TraesCS6A01G213300 TraesCS7A01G204000 TraesCS1D01G427800 TraesCS6A01G364300 TraesCS7B01G111000 TraesCS2D01G093700 TraesCS5A01G042200 TraesCS2A01G…
9058	biosynthetic process	0.00038626	0.0065938	293/2105 13.9%	477/3886 12.2%	TraesCS7D01G203800 TraesCS7B01G219800 TraesCS1D01G158400 TraesCS3B01G149800 TraesCS3B01G275700 TraesCS7A01G465300 TraesCS1B01G321900 TraesCS1B01G447900 TraesCS2B01G419200 Triticum_aestivum_newGene_49459 TraesCS5B01G542300 Triticum_aestivum_newGene_57886 TraesCS7A01G319000 TraesCS6B01G384500 Triticum_aestivum_newGene_57885 TraesCS3A01G417300 TraesCS6A01G148100 TraesCS4A01G320200 TraesCS2B01G247100…
33554	cellular response to stress	0.00047915	0.0081315	83/2105 3.9%	120/3886 3.0%	TraesCS4D01G044700 TraesCS3D01G366500 TraesCS2A01G103300 TraesCS1D01G296600 TraesCS7D01G442100 TraesCS1A01G284300 TraesCS7A01G369500 TraesCS4D01G246300 TraesCS5B01G471500 TraesCS5B01G444600 TraesCS7B01G486500 Triticum_aestivum_newGene_24844 TraesCS5D01G021400 TraesCS4A01G020800 TraesCS3B01G423800 TraesCS4A01G058000 Triticum_aestivum_newGene_20046 TraesCS5D01G237800 TraesCS3D01G239400 TraesCS4D01G…
34404	nucleobase, nucleoside and nucleotide biosynthetic process	0.00049588	0.0083665	26/2105 1.2%	31/3886 0.7%	TraesCS3A01G236700 TraesCS6B01G352300 TraesCS4D01G363700 TraesCS5D01G033200 TraesCS4B01G373600 TraesCS5B01G024600 TraesCS7D01G130500 TraesCS7B01G274100 TraesCS3B01G322400 TraesCS1A01G205200 TraesCSU01G116400 TraesCS3A01G222100 Triticum_aestivum_newGene_35196 TraesCS5D01G021400 TraesCS6D01G008000 TraesCS1D01G264100 TraesCS6A01G373000 TraesCS3B01G224600 TraesCS6B01G246000 TraesCS7D01G500200 TraesCS…
6281	DNA repair	0.00049989	0.0083855	44/2105 2.0%	58/3886 1.4%	TraesCS4D01G044700 TraesCS2A01G103300 TraesCS7D01G442100 TraesCS3D01G119400 TraesCS6D01G357600 TraesCS1A01G284300 TraesCS4D01G246300 TraesCS6A01G177000 TraesCS2B01G453300 Triticum_aestivum_newGene_57387 TraesCS1B01G225400 Triticum_aestivum_newGene_24844 TraesCS1A01G071500 TraesCS5A01G380800 TraesCS5D01G021400 TraesCS7B01G352800 TraesCS6B01G462700 TraesCS2A01G364000 TraesCS3B01G423800 TraesCS4A01G…
44249	cellular biosynthetic process	0.00054876	0.0091523	284/2105 13.4%	463/3886 11.9%	TraesCS7D01G203800 TraesCS7B01G219800 TraesCS1D01G158400 TraesCS3B01G149800 TraesCS7A01G465300 TraesCS1B01G321900 TraesCS1B01G447900 TraesCS2B01G419200 Triticum_aestivum_newGene_49459 TraesCS5B01G542300 Triticum_aestivum_newGene_57886 TraesCS7A01G319000 TraesCS6B01G384500 Triticum_aestivum_newGene_57885 TraesCS3A01G417300 TraesCS6A01G148100 TraesCS4A01G320200 TraesCS2B01G247100 TraesCS4A01G003800…
7346	regulation of mitotic cell cycle	0.00068993	0.011441	23/2105 1.0%	27/3886 0.6%	TraesCS7B01G352800 TraesCS6A01G360600 TraesCS3B01G307100 TraesCS6A01G311200 TraesCS6D01G151700 TraesCS7A01G248700 TraesCS6B01G190300 TraesCS7D01G442100 TraesCS3D01G119400 TraesCS7D01G247700 TraesCS7B01G142600 TraesCS6B01G341400 TraesCS1A01G284300 TraesCS1B01G326400 TraesCS6D01G344100 TraesCS3D01G272800 TraesCS3B01G136600 TraesCS6D01G290500 TraesCS5A01G166800 TraesCS2D01G093700 TraesCS6A01G161200 …
51239	regulation of multicellular organismal process	0.00075469	0.012444	41/2105 1.9%	54/3886 1.3%	TraesCS3B01G307100 TraesCS6A01G311200 TraesCS7B01G181200 TraesCS5A01G427500 TraesCS3B01G298900 TraesCS7D01G442100 TraesCS3D01G119400 TraesCS7D01G247700 TraesCS1A01G284300 TraesCS3D01G272800 TraesCS1A01G205200 TraesCS5A01G166800 TraesCS2D01G093700 TraesCS3D01G444100 TraesCS5B01G429500 TraesCS5B01G163900 TraesCS1A01G272300 TraesCS6D01G008000 TraesCS7B01G352800 TraesCS1A01G132400 TraesCS6A01G360600 …
9165	nucleotide biosynthetic process	0.00077826	0.012617	25/2105 1.1%	30/3886 0.7%	TraesCS3A01G236700 TraesCS6B01G352300 TraesCS4D01G363700 TraesCS5D01G033200 TraesCS4B01G373600 TraesCS5B01G024600 TraesCS7D01G130500 TraesCS7B01G274100 TraesCS3B01G322400 TraesCS1A01G205200 TraesCSU01G116400 TraesCS3A01G222100 Triticum_aestivum_newGene_35196 TraesCS5D01G021400 TraesCS6D01G008000 TraesCS1D01G264100 TraesCS6A01G373000 TraesCS3B01G224600 TraesCS6B01G246000 TraesCS7D01G500200 TraesCS…
10608	posttranscriptional regulation of gene expression	0.00077826	0.012617	25/2105 1.1%	30/3886 0.7%	TraesCS1A01G343300 TraesCS3A01G276500 TraesCS1B01G254900 Triticum_aestivum_newGene_2206 TraesCS7A01G451100 TraesCS5A01G460600 TraesCS5A01G042400 Triticum_aestivum_newGene_14265 Triticum_aestivum_newGene_16843 TraesCS1A01G243400 TraesCS5D01G472300 TraesCS1B01G326400 TraesCS5D01G050700 TraesCS2D01G033200 TraesCS4B01G094600 TraesCS2B01G047400 TraesCS2A01G033700 TraesCS5B01G470400 TraesCS3D01G118600 …
7059	chromosome segregation	0.00077826	0.012617	25/2105 1.1%	30/3886 0.7%	TraesCS2B01G261900 Triticum_aestivum_newGene_69244 Triticum_aestivum_newGene_69245 TraesCS3B01G298900 TraesCS2D01G132100 TraesCS7D01G207100 TraesCS6A01G213300 TraesCS7A01G204000 TraesCS1D01G427800 TraesCS6A01G364300 TraesCS7B01G111000 TraesCS2A01G145200 TraesCS2B01G170200 TraesCS3B01G423800 Triticum_aestivum_newGene_64262 TraesCS1B01G326400 TraesCS4B01G097500 TraesCS5A01G223700 TraesCS3A01G500600…
9416	response to light stimulus	0.00080007	0.012899	65/2105 3.0%	92/3886 2.3%	TraesCS3D01G366500 TraesCS1A01G314000 TraesCS7B01G349100 TraesCS4D01G180800 TraesCS4B01G261900 TraesCS3B01G468900 TraesCS2B01G297800 TraesCS7A01G369500 TraesCS7A01G451100 TraesCS4D01G246300 TraesCS1A01G205200 TraesCS2A01G280500 TraesCS7B01G486500 Triticum_aestivum_newGene_24844 TraesCS5D01G411300 TraesCS3D01G186300 TraesCS7D01G233300 TraesCS6A01G255800 TraesCS2B01G126800 TraesCS4A01G058000 TraesC…
280	nuclear division	0.00083686	0.013418	27/2105 1.2%	33/3886 0.8%	TraesCS3B01G307100 TraesCS6A01G311200 TraesCS7B01G181200 TraesCS3D01G119400 TraesCS7D01G247700 TraesCS2D01G132100 TraesCS7D01G207100 TraesCS3D01G272800 TraesCS7A01G204000 TraesCS7B01G111000 TraesCS2D01G093700 TraesCS3D01G373800 TraesCS2A01G404800 TraesCS3D01G264700 TraesCS3B01G423800 TraesCS7A01G248700 TraesCS3B01G224600 Triticum_aestivum_newGene_64262 TraesCS7B01G142600 TraesCS6B01G341400 TraesC…
87	M phase of mitotic cell cycle	0.0010992	0.017242	22/2105 1.0%	26/3886 0.6%	TraesCS2A01G404800 TraesCS3B01G423800 TraesCS6A01G311200 TraesCS7B01G181200 TraesCS7A01G248700 TraesCS3D01G119400 Triticum_aestivum_newGene_64262 TraesCS7D01G247700 TraesCS2D01G132100 TraesCS7B01G142600 TraesCS7D01G207100 TraesCS6B01G341400 TraesCS1B01G326400 TraesCS3D01G384700 TraesCS3B01G136600 TraesCS7A01G204000 TraesCS6D01G290500 TraesCS7B01G111000 TraesCS3A01G202300 TraesCS2B01G152100 TraesC…
9644	response to high light intensity	0.0010992	0.017242	22/2105 1.0%	26/3886 0.6%	TraesCS2B01G126800 TraesCS2D01G393800 TraesCS7B01G259000 TraesCS7A01G202200 TraesCS7D01G353800 TraesCS4D01G180800 TraesCS2D01G033200 TraesCS2B01G329900 TraesCS2A01G312900 TraesCS7A01G369500 TraesCS6B01G174500 TraesCS3D01G294300 TraesCS2D01G311400 TraesCS7A01G451100 TraesCS2B01G047400 TraesCS2A01G033700 TraesCS3D01G273600 TraesCS7B01G351000 TraesCS1A01G340100 TraesCS4B01G179300 TraesCS1D01G342100 …
15077	monovalent inorganic cation transmembrane transporter activity	0.0010992	0.017242	22/2105 1.0%	26/3886 0.6%	TraesCS7B01G134700 TraesCS7B01G371100 TraesCS6D01G061800 TraesCS7A01G246800 TraesCS3A01G446600 TraesCS1A01G320400 TraesCS7D01G500200 TraesCS3B01G481800 TraesCS3B01G322400 TraesCS6B01G126800 TraesCS7D01G456900 TraesCS6A01G098500 TraesCS6A01G098600 TraesCS3D01G439200 TraesCS1B01G332600 TraesCS7A01G469300 TraesCS7B01G116700 TraesCS1D01G282100 TraesCS7D01G236800 Triticum_aestivum_newGene_35196 Tritic…
7067	mitosis	0.0010992	0.017242	22/2105 1.0%	26/3886 0.6%	TraesCS2A01G404800 TraesCS3B01G423800 TraesCS6A01G311200 TraesCS7B01G181200 TraesCS7A01G248700 TraesCS3D01G119400 Triticum_aestivum_newGene_64262 TraesCS7D01G247700 TraesCS2D01G132100 TraesCS7B01G142600 TraesCS7D01G207100 TraesCS6B01G341400 TraesCS1B01G326400 TraesCS3D01G384700 TraesCS3B01G136600 TraesCS7A01G204000 TraesCS6D01G290500 TraesCS7B01G111000 TraesCS3A01G202300 TraesCS2B01G152100 TraesC…
15079	potassium ion transmembrane transporter activity	0.0011642	0.018164	11/2105 0.5%	11/3886 0.2%	TraesCS7D01G456900 TraesCS7B01G371100 TraesCS3D01G439200 TraesCS1B01G332600 TraesCS6D01G061800 TraesCS7A01G246800 TraesCS7A01G469300 TraesCS3A01G446600 TraesCS7B01G116700 TraesCS1A01G320400 TraesCS3B01G481800
10564	regulation of cell cycle process	0.0012831	0.019806	26/2105 1.2%	32/3886 0.8%	TraesCS3B01G307100 TraesCS6A01G311200 TraesCS6D01G151700 TraesCS7B01G181200 TraesCS6B01G190300 TraesCS7D01G442100 TraesCS3D01G119400 TraesCS7D01G247700 TraesCS1A01G284300 TraesCS3D01G272800 TraesCS5A01G166800 TraesCS2D01G093700 TraesCS6A01G161200 TraesCS5B01G163900 TraesCS7B01G352800 TraesCS6A01G360600 TraesCS7A01G248700 TraesCS7B01G142600 TraesCS6B01G341400 TraesCS1B01G326400 TraesCS6D01G344100 …
44451	nucleoplasm part	0.0012831	0.019806	26/2105 1.2%	32/3886 0.8%	Triticum_aestivum_newGene_21945 TraesCS2A01G346300 Triticum_aestivum_newGene_68350 Triticum_aestivum_newGene_68596 TraesCS5B01G498800 TraesCS4A01G003800 Triticum_aestivum_newGene_24844 TraesCS6A01G360600 Triticum_aestivum_newGene_68348 Triticum_aestivum_newGene_18443 Triticum_aestivum_newGene_53091 Triticum_aestivum_newGene_20100 TraesCS1D01G264100 TraesCS3B01G224600 TraesCS1A01G264000 TraesCS5D0…
9893	positive regulation of metabolic process	0.0013137	0.019861	28/2105 1.3%	35/3886 0.9%	TraesCS6A01G082300 TraesCS7B01G259000 TraesCS1A01G314000 TraesCS4B01G222300 TraesCS2B01G297800 TraesCS7A01G560200 TraesCS7A01G369500 TraesCS3B01G452200 TraesCS4A01G081500 TraesCS3A01G417300 TraesCS2A01G280500 TraesCS4D01G053600 TraesCS7B01G486500 TraesCS2D01G279300 TraesCS4A01G261000 TraesCS1A01G272300 TraesCS2B01G126800 TraesCS7D01G353800 TraesCS4B01G053600 TraesCS7A01G475400 TraesCS4D01G222800 …
31325	positive regulation of cellular metabolic process	0.0013137	0.019861	28/2105 1.3%	35/3886 0.9%	TraesCS6A01G082300 TraesCS7B01G259000 TraesCS1A01G314000 TraesCS4B01G222300 TraesCS2B01G297800 TraesCS7A01G560200 TraesCS7A01G369500 TraesCS3B01G452200 TraesCS4A01G081500 TraesCS3A01G417300 TraesCS2A01G280500 TraesCS4D01G053600 TraesCS7B01G486500 TraesCS2D01G279300 TraesCS4A01G261000 TraesCS1A01G272300 TraesCS2B01G126800 TraesCS7D01G353800 TraesCS4B01G053600 TraesCS7A01G475400 TraesCS4D01G222800 …
48285	organelle fission	0.0013137	0.019861	28/2105 1.3%	35/3886 0.9%	TraesCS3B01G307100 TraesCS6A01G311200 TraesCS7B01G181200 TraesCS3D01G119400 TraesCS7D01G247700 TraesCS2D01G132100 TraesCS7D01G207100 TraesCS3D01G272800 TraesCS7A01G204000 TraesCS7B01G111000 TraesCS2D01G093700 TraesCS3D01G373800 TraesCS2A01G404800 TraesCS3D01G264700 TraesCS3B01G423800 TraesCS7A01G248700 TraesCS2D01G312000 TraesCS3B01G224600 Triticum_aestivum_newGene_64262 TraesCS7B01G142600 TraesC…
9733	response to auxin stimulus	0.0013141	0.019861	30/2105 1.4%	38/3886 0.9%	TraesCS1A01G343300 TraesCS3A01G276500 TraesCS5A01G056700 TraesCS3B01G452200 TraesCS3A01G417300 TraesCS5B01G060100 TraesCS7D01G072600 TraesCS4A01G192200 TraesCS1D01G320300 TraesCS5D01G411300 TraesCS1B01G445400 TraesCS1A01G278400 Triticum_aestivum_newGene_14265 TraesCS5D01G067900 TraesCS3D01G317400 TraesCS3A01G323800 TraesCS5B01G023700 TraesCS4D01G121300 TraesCS5D01G032700 TraesCS1A01G415400 TraesC…
50793	regulation of developmental process	0.0013213	0.019868	43/2105 2.0%	58/3886 1.4%	TraesCS3B01G307100 TraesCS6A01G311200 TraesCS7B01G181200 TraesCS5A01G427500 TraesCS3B01G298900 TraesCS7D01G442100 TraesCS3D01G119400 TraesCS7D01G247700 TraesCS1A01G284300 TraesCS3D01G272800 TraesCS1A01G205200 TraesCS5A01G166800 TraesCS2D01G093700 TraesCS3D01G444100 TraesCS5B01G429500 TraesCS5B01G163900 TraesCS1A01G272300 TraesCS6D01G008000 TraesCS7B01G352800 TraesCS1A01G132400 TraesCS6A01G360600 …
45735	nutrient reservoir activity	0.0013659	0.020432	14/2105 0.6%	15/3886 0.3%	TraesCS4B01G377100 TraesCS4B01G377200 TraesCS4B01G377300 Triticum_aestivum_newGene_62168 TraesCS5D01G360600 TraesCS3D01G280400 TraesCS4B01G378000 TraesCSU01G145600 TraesCS7A01G545600 TraesCS4B01G377400 TraesCS3B01G593800 TraesCS7A01G545400 TraesCS5A01G544400 TraesCS3B01G601500
70035	purine NTP-dependent helicase activity	0.0015133	0.022406	19/2105 0.9%	22/3886 0.5%	TraesCS1A01G243400 TraesCS5B01G354900 TraesCS2A01G103300 TraesCS2B01G363700 TraesCS4B01G053600 TraesCS2A01G451900 TraesCS2D01G451700 TraesCS7B01G103700 TraesCS2B01G473200 TraesCS2B01G120600 TraesCS1B01G254900 TraesCS5D01G565400 TraesCS4B01G094600 TraesCS2D01G102800 TraesCS4D01G053600 TraesCS7D01G199800 TraesCS3D01G112900 TraesCS2D01G180800 TraesCS4A01G261000
8026	ATP-dependent helicase activity	0.0015133	0.022406	19/2105 0.9%	22/3886 0.5%	TraesCS1A01G243400 TraesCS5B01G354900 TraesCS2A01G103300 TraesCS2B01G363700 TraesCS4B01G053600 TraesCS2A01G451900 TraesCS2D01G451700 TraesCS7B01G103700 TraesCS2B01G473200 TraesCS2B01G120600 TraesCS1B01G254900 TraesCS5D01G565400 TraesCS4B01G094600 TraesCS2D01G102800 TraesCS4D01G053600 TraesCS7D01G199800 TraesCS3D01G112900 TraesCS2D01G180800 TraesCS4A01G261000
22890	inorganic cation transmembrane transporter activity	0.0017277	0.025383	35/2105 1.6%	46/3886 1.1%	TraesCS7A01G327300 TraesCS6D01G061800 TraesCS1D01G296600 TraesCS3A01G446600 TraesCS1A01G320400 Triticum_aestivum_newGene_67167 TraesCS3B01G322400 TraesCS6B01G126800 TraesCS6A01G098500 TraesCS6A01G098600 TraesCS3D01G439200 TraesCS1B01G332600 TraesCS1D01G282100 Triticum_aestivum_newGene_35196 TraesCS7A01G239000 TraesCS7B01G134700 TraesCS7B01G371100 TraesCS7A01G357400 TraesCS7A01G246800 TraesCS7D01G…
6364	rRNA processing	0.0017406	0.025383	21/2105 0.9%	25/3886 0.6%	Triticum_aestivum_newGene_58481 TraesCS6A01G082300 Triticum_aestivum_newGene_52907 TraesCS4B01G223100 Triticum_aestivum_newGene_43068 TraesCS3D01G256700 TraesCS2A01G117000 TraesCS1B01G214700 TraesCS3B01G468900 TraesCS2B01G297800 TraesCS7A01G560200 TraesCS2A01G280500 Triticum_aestivum_newGene_30772 TraesCS7B01G486500 TraesCS2D01G279300 TraesCS2B01G469100 TraesCS3D01G423300 TraesCS4A01G080900 Traes…
16072	rRNA metabolic process	0.0017406	0.025383	21/2105 0.9%	25/3886 0.6%	Triticum_aestivum_newGene_58481 TraesCS6A01G082300 Triticum_aestivum_newGene_52907 TraesCS4B01G223100 Triticum_aestivum_newGene_43068 TraesCS3D01G256700 TraesCS2A01G117000 TraesCS1B01G214700 TraesCS3B01G468900 TraesCS2B01G297800 TraesCS7A01G560200 TraesCS2A01G280500 Triticum_aestivum_newGene_30772 TraesCS7B01G486500 TraesCS2D01G279300 TraesCS2B01G469100 TraesCS3D01G423300 TraesCS4A01G080900 Traes…
10604	positive regulation of macromolecule metabolic process	0.0019719	0.028613	27/2105 1.2%	34/3886 0.8%	TraesCS6A01G082300 TraesCS7B01G259000 TraesCS1A01G314000 TraesCS4B01G222300 TraesCS2B01G297800 TraesCS7A01G560200 TraesCS7A01G369500 TraesCS3B01G452200 TraesCS4A01G081500 TraesCS3A01G417300 TraesCS2A01G280500 TraesCS4D01G053600 TraesCS7B01G486500 TraesCS2D01G279300 TraesCS4A01G261000 TraesCS1A01G272300 TraesCS2B01G126800 TraesCS7D01G353800 TraesCS4B01G053600 TraesCS7A01G475400 TraesCS4D01G222800 …
9411	response to UV	0.0021539	0.030491	10/2105 0.4%	10/3886 0.2%	TraesCS6A01G255800 TraesCS4D01G246300 TraesCS6A01G177000 TraesCS3B01G136600 TraesCS4A01G058000 TraesCS4B01G246900 TraesCS1D01G176400 TraesCS4D01G238200 TraesCS3D01G119400 TraesCS4B01G236700
9581	detection of external stimulus	0.0021539	0.030491	10/2105 0.4%	10/3886 0.2%	TraesCS2D01G462000 TraesCS1A01G132400 TraesCS2B01G483400 TraesCS4B01G123200 TraesCS1D01G296600 TraesCS1B01G154500 TraesCS2A01G461800 TraesCS4A01G192200 TraesCS4D01G121300 TraesCS7D01G246600
42743	hydrogen peroxide metabolic process	0.0021539	0.030491	10/2105 0.4%	10/3886 0.2%	TraesCS2B01G087400 TraesCS5D01G230300 TraesCS2D01G070500 Triticum_aestivum_newGene_20046 TraesCS4D01G322700 TraesCS4B01G197900 TraesCS7B01G486500 TraesCS4A01G106300 TraesCS7A01G560200 TraesCS3B01G138200
6366	transcription from RNA polymerase II promoter	0.0021539	0.030491	10/2105 0.4%	10/3886 0.2%	Triticum_aestivum_newGene_68348 Triticum_aestivum_newGene_3656 TraesCS4D01G222800 TraesCS4A01G081500 Triticum_aestivum_newGene_18443 TraesCS5B01G498800 Triticum_aestivum_newGene_68350 TraesCS4B01G222300 TraesCS5B01G499000 TraesCS5D01G499000
6800	oxygen and reactive oxygen species metabolic process	0.0021539	0.030491	10/2105 0.4%	10/3886 0.2%	TraesCS2B01G087400 TraesCS5D01G230300 TraesCS2D01G070500 Triticum_aestivum_newGene_20046 TraesCS4D01G322700 TraesCS4B01G197900 TraesCS7B01G486500 TraesCS4A01G106300 TraesCS7A01G560200 TraesCS3B01G138200
16137	glycoside metabolic process	0.0024438	0.034427	18/2105 0.8%	21/3886 0.5%	TraesCS6D01G298500 TraesCS6D01G282800 TraesCS6D01G334000 TraesCS3A01G092800 TraesCS4A01G334500 TraesCS5B01G202200 TraesCS5D01G535600 TraesCS3D01G256700 TraesCS5D01G210000 TraesCS2A01G105900 TraesCS5D01G537500 TraesCS5A01G203500 TraesCS1A01G064800 TraesCS1D01G065600 TraesCS6B01G384500 TraesCS6A01G303200 TraesCS2A01G161200 TraesCS3B01G138200
33279	ribosomal subunit	0.0027383	0.038389	20/2105 0.9%	24/3886 0.6%	TraesCS2D01G458700 TraesCS7A01G487500 TraesCS2D01G474700 Triticum_aestivum_newGene_29183 TraesCS2A01G458100 TraesCS1A01G227100 TraesCS1D01G228700 TraesCS5D01G269800 TraesCS5B01G260700 TraesCS2B01G430100 TraesCS7D01G474200 TraesCS7B01G390900 TraesCS7D01G474300 TraesCS1B01G241200 TraesCS2B01G480600 TraesCS6A01G148100 TraesCS7D01G454100 TraesCS2D01G459200 TraesCS2D01G459000 TraesCS5D01G414600
42254	ribosome biogenesis	0.0028999	0.04043	22/2105 1.0%	27/3886 0.6%	Triticum_aestivum_newGene_58481 TraesCS6A01G082300 Triticum_aestivum_newGene_52907 TraesCS4B01G223100 Triticum_aestivum_newGene_43068 TraesCS3D01G256700 TraesCS2A01G117000 TraesCS1B01G214700 TraesCS3B01G468900 TraesCS2B01G297800 TraesCS7A01G560200 TraesCS2A01G280500 Triticum_aestivum_newGene_30772 TraesCS7B01G486500 TraesCS2D01G279300 TraesCS1D01G194100 TraesCS2B01G469100 TraesCS3D01G423300 Traes…
55114	oxidation reduction	0.0029117	0.04043	151/2105 7.1%	240/3886 6.1%	TraesCS3B01G164000 TraesCS1D01G158400 TraesCS7A01G354000 TraesCS2A01G398800 TraesCS3B01G275700 TraesCS2A01G371200 TraesCS1B01G321900 TraesCS1B01G447900 Triticum_aestivum_newGene_64976 TraesCS6D01G355000 TraesCS7A01G203200 TraesCS3B01G128700 TraesCS7B01G349100 TraesCS7A01G302400 TraesCS7D01G130500 TraesCS3B01G468900 TraesCS1D01G359100 Triticum_aestivum_newGene_54652 TraesCS7A01G428400 Triticum_aes…
9891	positive regulation of biosynthetic process	0.0029584	0.040689	24/2105 1.1%	30/3886 0.7%	TraesCS6A01G082300 TraesCS2B01G126800 TraesCS7B01G259000 TraesCS7D01G353800 TraesCS1A01G314000 TraesCS4B01G222300 TraesCS2B01G297800 TraesCS7A01G560200 TraesCS7A01G475400 TraesCS7A01G369500 TraesCS4D01G222800 TraesCS4B01G094600 TraesCS3B01G452200 TraesCS4A01G081500 TraesCS7A01G127600 TraesCS3A01G417300 TraesCS2A01G280500 TraesCS3D01G273600 TraesCS1A01G340100 TraesCS7B01G486500 TraesCS2D01G279300 …
31328	positive regulation of cellular biosynthetic process	0.0029584	0.040689	24/2105 1.1%	30/3886 0.7%	TraesCS6A01G082300 TraesCS2B01G126800 TraesCS7B01G259000 TraesCS7D01G353800 TraesCS1A01G314000 TraesCS4B01G222300 TraesCS2B01G297800 TraesCS7A01G560200 TraesCS7A01G475400 TraesCS7A01G369500 TraesCS4D01G222800 TraesCS4B01G094600 TraesCS3B01G452200 TraesCS4A01G081500 TraesCS7A01G127600 TraesCS3A01G417300 TraesCS2A01G280500 TraesCS3D01G273600 TraesCS1A01G340100 TraesCS7B01G486500 TraesCS2D01G279300 …
6302	double-strand break repair	0.0033011	0.044976	15/2105 0.7%	17/3886 0.4%	TraesCS4D01G044700 TraesCS7B01G352800 TraesCS1A01G329600 TraesCS1D01G331700 TraesCS1B01G343100 TraesCS7D01G442100 TraesCS7A01G213600 TraesCS5D01G565400 TraesCS3A01G500600 TraesCS5B01G131900 TraesCS2B01G453300 TraesCS5B01G384400 TraesCS3A01G097200 TraesCS5A01G380800 TraesCS3D01G097700
6346	methylation-dependent chromatin silencing	0.0033011	0.044976	15/2105 0.7%	17/3886 0.4%	TraesCS3B01G307100 TraesCS5D01G472300 TraesCS6A01G311200 TraesCS4B01G053600 TraesCS3B01G298900 TraesCS6B01G341400 TraesCS1B01G326400 TraesCS5A01G460600 TraesCS3D01G272800 TraesCS5B01G470400 TraesCS6D01G290500 TraesCS4D01G053600 TraesCS2D01G093700 TraesCS3A01G202300 TraesCS4A01G261000
44248	cellular catabolic process	0.0033991	0.046094	99/2105 4.7%	152/3886 3.9%	TraesCS2D01G600900 TraesCS3B01G307100 TraesCS1D01G345100 TraesCS7A01G465300 TraesCS3B01G468900 TraesCS3A01G184000 TraesCS7A01G183900 TraesCS1B01G269400 TraesCS6A01G303200 TraesCS7B01G260800 TraesCS1D01G194100 TraesCS7D01G386600 TraesCS6D01G121200 TraesCS4D01G322700 TraesCS4B01G197900 TraesCS2B01G342100 TraesCS7D01G500200 TraesCS1D01G379900 TraesCS2A01G117000 TraesCS3A01G083700 TraesCS6B01G174500 …

## Sheet: BINGO-down-regulated
GO ID	GO Description	P-value	Corrected P-value	Cluster frequency	Total frequency	Genes
6793	phosphorus metabolic process	3.1794e-18	3.4115e-15	257/1525 16.8%	439/3886 11.2%	TraesCS2B01G553400 TraesCS3B01G351100 TraesCS3B01G355700 TraesCS7D01G050100 TraesCS4A01G145600 TraesCS3A01G326400 TraesCS2A01G218600 TraesCS1D01G187400 TraesCS3A01G306000 TraesCS5D01G144600 TraesCS7A01G155200 TraesCS5B01G137600 TraesCS1B01G355800 TraesCS6A01G182800 TraesCS3D01G295900 Triticum_aestivum_newGene_22543 TraesCS7A01G168400 TraesCS4D01G282700 TraesCS7D01G357700 TraesCS1B01G152400 TraesC…
6796	phosphate metabolic process	3.1794e-18	3.4115e-15	257/1525 16.8%	439/3886 11.2%	TraesCS2B01G553400 TraesCS3B01G351100 TraesCS3B01G355700 TraesCS7D01G050100 TraesCS4A01G145600 TraesCS3A01G326400 TraesCS2A01G218600 TraesCS1D01G187400 TraesCS3A01G306000 TraesCS5D01G144600 TraesCS7A01G155200 TraesCS5B01G137600 TraesCS1B01G355800 TraesCS6A01G182800 TraesCS3D01G295900 Triticum_aestivum_newGene_22543 TraesCS7A01G168400 TraesCS4D01G282700 TraesCS7D01G357700 TraesCS1B01G152400 TraesC…
16310	phosphorylation	8.1438e-14	5.8256e-11	228/1525 14.9%	403/3886 10.3%	TraesCS2B01G553400 TraesCS3B01G351100 TraesCS3B01G355700 TraesCS7D01G050100 TraesCS4A01G145600 TraesCS3A01G326400 TraesCS2A01G218600 TraesCS1D01G187400 TraesCS3A01G306000 TraesCS7A01G155200 TraesCS5B01G137600 TraesCS1B01G355800 TraesCS6A01G182800 TraesCS3D01G295900 Triticum_aestivum_newGene_22543 TraesCS7D01G357700 TraesCS1B01G152400 TraesCS2B01G474600 TraesCS4B01G133100 TraesCS1A01G138700 TraesC…
16301	kinase activity	2.6749e-13	1.4351e-10	233/1525 15.2%	417/3886 10.7%	TraesCS2B01G553400 Triticum_aestivum_newGene_70974 TraesCS3B01G351100 TraesCS3B01G355700 TraesCS7D01G050100 TraesCS4A01G145600 TraesCS3A01G326400 TraesCS2A01G218600 TraesCS1D01G187400 TraesCS3A01G306000 TraesCS7A01G155200 TraesCS5B01G137600 TraesCS1B01G355800 TraesCS6A01G182800 TraesCS3D01G295900 Triticum_aestivum_newGene_22543 TraesCS7D01G357700 TraesCS1B01G152400 TraesCS2B01G474600 TraesCS4B01G…
16772	transferase activity, transferring phosphorus-containing groups	1.8445e-12	7.9164e-10	252/1525 16.5%	464/3886 11.9%	TraesCS2B01G553400 Triticum_aestivum_newGene_70974 TraesCS3B01G351100 TraesCS3B01G355700 TraesCS7D01G050100 TraesCS4A01G145600 TraesCS3A01G326400 TraesCS2A01G218600 TraesCS1D01G187400 TraesCS3A01G306000 TraesCS7A01G155200 TraesCS5B01G137600 TraesCS1B01G355800 TraesCS2B01G430000 TraesCS6A01G182800 TraesCSU01G109000 TraesCS3D01G295900 Triticum_aestivum_newGene_22543 TraesCS7D01G357700 TraesCS1B01G1…
48588	developmental cell growth	9.2361e-12	3.3034e-09	48/1525 3.1%	58/3886 1.4%	TraesCS6D01G189200 TraesCS6D01G281900 TraesCS6A01G202800 TraesCS1B01G420200 TraesCS7D01G272000 TraesCS6A01G200700 TraesCS2D01G342500 TraesCS4B01G002300 TraesCS2A01G327200 TraesCS7D01G354500 TraesCS6D01G183300 TraesCS2A01G321100 TraesCS3B01G183500 TraesCS6A01G097200 TraesCS3D01G270200 TraesCS3A01G157100 TraesCS5A01G132500 TraesCS7B01G170300 TraesCS4D01G001000 TraesCS1D01G144300 TraesCS1D01G400200 …
35295	tube development	1.5605e-11	4.1861e-09	44/1525 2.8%	52/3886 1.3%	TraesCS7A01G549700 TraesCS6D01G189200 TraesCS6D01G281900 TraesCS1B01G420200 TraesCS7D01G272000 TraesCS6A01G200700 TraesCS4B01G002300 TraesCS7B01G473200 TraesCS7D01G354500 TraesCS6D01G183300 TraesCS3B01G183500 TraesCS3D01G270200 TraesCS3A01G157100 TraesCS5A01G132500 TraesCS7B01G170300 TraesCS4D01G001000 TraesCS1D01G144300 TraesCS1D01G400200 TraesCS6A01G196000 TraesCS2A01G403000 TraesCS4A01G001100 …
48868	pollen tube development	1.5605e-11	4.1861e-09	44/1525 2.8%	52/3886 1.3%	TraesCS7A01G549700 TraesCS6D01G189200 TraesCS6D01G281900 TraesCS1B01G420200 TraesCS7D01G272000 TraesCS6A01G200700 TraesCS4B01G002300 TraesCS7B01G473200 TraesCS7D01G354500 TraesCS6D01G183300 TraesCS3B01G183500 TraesCS3D01G270200 TraesCS3A01G157100 TraesCS5A01G132500 TraesCS7B01G170300 TraesCS4D01G001000 TraesCS1D01G144300 TraesCS1D01G400200 TraesCS6A01G196000 TraesCS2A01G403000 TraesCS4A01G001100 …
16740	transferase activity	2.0804e-11	4.9606e-09	357/1525 23.4%	709/3886 18.2%	TraesCS2B01G553400 Triticum_aestivum_newGene_70974 TraesCS4D01G195500 TraesCS4D01G021300 TraesCS2B01G144900 TraesCS3B01G351100 TraesCS3B01G355700 TraesCS7D01G050100 TraesCS4A01G145600 TraesCS3A01G326400 TraesCS2A01G218600 TraesCS1D01G187400 TraesCS3A01G306000 TraesCS7D01G008800 TraesCS7A01G155200 TraesCS5B01G137600 TraesCS1B01G355800 TraesCS2B01G430000 TraesCS6A01G182800 TraesCSU01G109000 TraesCS…
16773	phosphotransferase activity, alcohol group as acceptor	2.9765e-11	6.3876e-09	204/1525 13.3%	368/3886 9.4%	TraesCS2B01G553400 TraesCS3B01G351100 TraesCS3B01G355700 TraesCS7D01G050100 TraesCS4A01G145600 TraesCS3A01G326400 TraesCS2A01G218600 TraesCS1D01G187400 TraesCS3A01G306000 TraesCS7A01G155200 TraesCS5B01G137600 TraesCS1B01G355800 TraesCS6A01G182800 TraesCS3D01G295900 TraesCS7D01G357700 TraesCS2B01G474600 TraesCS4B01G133100 TraesCS4A01G185600 TraesCS6A01G154900 TraesCS3B01G259100 TraesCS7D01G387000 …
9932	cell tip growth	3.4267e-11	6.6851e-09	43/1525 2.8%	51/3886 1.3%	TraesCS6D01G189200 TraesCS6D01G281900 TraesCS1B01G420200 TraesCS7D01G272000 TraesCS6A01G200700 TraesCS4B01G002300 TraesCS2A01G327200 TraesCS7D01G354500 TraesCS6D01G183300 TraesCS3B01G183500 TraesCS6A01G097200 TraesCS3D01G270200 TraesCS3A01G157100 TraesCS5A01G132500 TraesCS7B01G170300 TraesCS4D01G001000 TraesCS1D01G144300 TraesCS1D01G400200 TraesCS6A01G196000 TraesCS4A01G001100 TraesCSU01G211800 T…
48468	cell development	9.2551e-11	1.6551e-08	51/1525 3.3%	65/3886 1.6%	TraesCS6D01G189200 TraesCS2A01G327200 TraesCS6D01G183300 TraesCS2A01G321100 TraesCS3D01G270200 TraesCS3A01G157100 TraesCS5A01G132500 TraesCS1B01G166800 TraesCS1D01G400200 TraesCS4A01G001100 TraesCS3B01G331000 TraesCS6D01G085200 TraesCS7A01G271700 TraesCS4B01G133100 TraesCS5B01G132400 TraesCS4A01G185600 TraesCSU01G211700 TraesCSU01G217800 TraesCS6B01G125700 TraesCS2D01G335700 TraesCS7A01G368400 Tr…
9856	pollination	2.5374e-10	4.1886e-08	51/1525 3.3%	66/3886 1.6%	TraesCS7A01G549700 TraesCS6D01G189200 TraesCS2B01G144900 TraesCS6D01G183300 TraesCS3D01G270200 TraesCS3A01G157100 TraesCS5A01G132500 TraesCS1D01G400200 TraesCS2A01G403000 TraesCS4A01G001100 TraesCS1A01G014500 TraesCS3B01G331000 TraesCS7A01G271700 TraesCS4B01G133100 TraesCS5B01G132400 TraesCS5B01G411600 TraesCS4A01G185600 TraesCSU01G211700 TraesCSU01G217800 TraesCS7A01G368400 TraesCS5A01G406600 Tr…
40007	growth	1.1476e-09	1.7591e-07	58/1525 3.8%	80/3886 2.0%	TraesCS6D01G189200 TraesCS2A01G327200 TraesCS7A01G136600 TraesCS6D01G183300 TraesCS2A01G321100 TraesCS3D01G270200 TraesCS3A01G157100 TraesCS5A01G132500 TraesCS7B01G037700 TraesCS1B01G166800 TraesCS1D01G400200 TraesCS4A01G001100 TraesCS3B01G331000 TraesCS6D01G085200 TraesCS7A01G271700 TraesCS4B01G133100 TraesCS5B01G132400 TraesCS3D01G266400 TraesCS3B01G299800 TraesCS4A01G185600 TraesCSU01G211700 T…
9860	pollen tube growth	1.6461e-09	2.0855e-07	38/1525 2.4%	46/3886 1.1%	TraesCS6D01G189200 TraesCS6D01G281900 TraesCS1B01G420200 TraesCS7D01G272000 TraesCS6A01G200700 TraesCS4B01G002300 TraesCS7D01G354500 TraesCS6D01G183300 TraesCS3B01G183500 TraesCS3D01G270200 TraesCS3A01G157100 TraesCS5A01G132500 TraesCS7B01G170300 TraesCS4D01G001000 TraesCS1D01G144300 TraesCS1D01G400200 TraesCS6A01G196000 TraesCS4A01G001100 TraesCSU01G211800 TraesCS3B01G331000 TraesCS7B01G260100 T…
8361	regulation of cell size	1.8464e-09	2.0855e-07	56/1525 3.6%	77/3886 1.9%	TraesCS6D01G189200 TraesCS2A01G327200 TraesCS7A01G136600 TraesCS6D01G183300 TraesCS2A01G321100 TraesCS3D01G270200 TraesCS3A01G157100 TraesCS5A01G132500 TraesCS7B01G037700 TraesCS1B01G166800 TraesCS1D01G400200 TraesCS4A01G001100 TraesCS3B01G331000 TraesCS6D01G085200 TraesCS7A01G271700 TraesCS4B01G133100 TraesCS5B01G132400 TraesCS4A01G185600 TraesCSU01G211700 TraesCSU01G217800 TraesCS6B01G125700 Tr…
16049	cell growth	1.8464e-09	2.0855e-07	56/1525 3.6%	77/3886 1.9%	TraesCS6D01G189200 TraesCS2A01G327200 TraesCS7A01G136600 TraesCS6D01G183300 TraesCS2A01G321100 TraesCS3D01G270200 TraesCS3A01G157100 TraesCS5A01G132500 TraesCS7B01G037700 TraesCS1B01G166800 TraesCS1D01G400200 TraesCS4A01G001100 TraesCS3B01G331000 TraesCS6D01G085200 TraesCS7A01G271700 TraesCS4B01G133100 TraesCS5B01G132400 TraesCS4A01G185600 TraesCSU01G211700 TraesCSU01G217800 TraesCS6B01G125700 Tr…
32535	regulation of cellular component size	1.8464e-09	2.0855e-07	56/1525 3.6%	77/3886 1.9%	TraesCS6D01G189200 TraesCS2A01G327200 TraesCS7A01G136600 TraesCS6D01G183300 TraesCS2A01G321100 TraesCS3D01G270200 TraesCS3A01G157100 TraesCS5A01G132500 TraesCS7B01G037700 TraesCS1B01G166800 TraesCS1D01G400200 TraesCS4A01G001100 TraesCS3B01G331000 TraesCS6D01G085200 TraesCS7A01G271700 TraesCS4B01G133100 TraesCS5B01G132400 TraesCS4A01G185600 TraesCSU01G211700 TraesCSU01G217800 TraesCS6B01G125700 Tr…
90066	regulation of anatomical structure size	1.8464e-09	2.0855e-07	56/1525 3.6%	77/3886 1.9%	TraesCS6D01G189200 TraesCS2A01G327200 TraesCS7A01G136600 TraesCS6D01G183300 TraesCS2A01G321100 TraesCS3D01G270200 TraesCS3A01G157100 TraesCS5A01G132500 TraesCS7B01G037700 TraesCS1B01G166800 TraesCS1D01G400200 TraesCS4A01G001100 TraesCS3B01G331000 TraesCS6D01G085200 TraesCS7A01G271700 TraesCS4B01G133100 TraesCS5B01G132400 TraesCS4A01G185600 TraesCSU01G211700 TraesCSU01G217800 TraesCS6B01G125700 Tr…
65008	regulation of biological quality	4.6492e-09	4.9886e-07	103/1525 6.7%	169/3886 4.3%	Triticum_aestivum_newGene_18157 TraesCS1B01G315900 TraesCS2A01G327200 TraesCS3B01G298700 TraesCS6D01G183300 TraesCS2A01G321100 TraesCS3D01G270200 TraesCS1B01G166800 TraesCS1D01G400200 TraesCS1B01G311300 TraesCS4A01G001100 TraesCS4B01G078000 TraesCS6D01G085200 Triticum_aestivum_newGene_7332 TraesCS1D01G304800 TraesCS7A01G271700 TraesCS4B01G133100 Triticum_aestivum_newGene_8666 Triticum_aestivum_ne…
6810	transport	7.0288e-09	7.1828e-07	211/1525 13.8%	401/3886 10.3%	TraesCS3D01G343500 TraesCS7A01G490500 TraesCS2B01G232400 TraesCS4D01G195500 TraesCS1B01G315900 Triticum_aestivum_newGene_51898 TraesCS3B01G298700 TraesCS1A01G410200 TraesCS4A01G388100 TraesCS2B01G430000 TraesCS5A01G155300 TraesCS7D01G221900 TraesCS3B01G322900 TraesCS5D01G300800 TraesCS2B01G258900 TraesCS6D01G085200 TraesCS1D01G304800 TraesCS4B01G133100 TraesCS3A01G252300 Triticum_aestivum_newGene…
4721	phosphoprotein phosphatase activity	7.5056e-09	7.3214e-07	36/1525 2.3%	44/3886 1.1%	TraesCS7D01G417600 TraesCS6A01G202800 TraesCS6B01G220000 TraesCS5B01G078500 TraesCS1A01G095500 Triticum_aestivum_newGene_43213 TraesCS7D01G169300 TraesCS5D01G089100 TraesCS6D01G388000 TraesCS5D01G144600 TraesCS7B01G326200 Triticum_aestivum_newGene_56517 TraesCS7A01G533600 TraesCS1B01G128100 TraesCS5B01G146700 TraesCS6B01G449000 TraesCS1D01G104400 TraesCS7A01G168400 TraesCS4D01G282700 TraesCS7D01G…
5083	small GTPase regulator activity	1.5216e-08	1.4197e-06	22/1525 1.4%	23/3886 0.5%	TraesCSU01G211800 TraesCS3B01G331000 TraesCS3B01G548000 TraesCS1B01G420200 TraesCS1B01G251400 TraesCS2A01G219400 TraesCS1A01G392100 TraesCS6D01G183300 TraesCS3A01G270400 TraesCSU01G211700 TraesCSU01G217800 TraesCS2D01G225300 TraesCS3D01G296400 TraesCS3D01G270200 Triticum_aestivum_newGene_27700 TraesCS3A01G305500 Triticum_aestivum_newGene_28357 TraesCS2B01G245000 TraesCS1D01G400200 TraesCS6A01G196…
48589	developmental growth	2.0026e-08	1.7906e-06	51/1525 3.3%	71/3886 1.8%	TraesCS6D01G189200 TraesCS2A01G327200 TraesCS6D01G183300 TraesCS2A01G321100 TraesCS3D01G270200 TraesCS3A01G157100 TraesCS5A01G132500 TraesCS1D01G400200 TraesCS4A01G001100 TraesCS3B01G331000 TraesCS6D01G085200 TraesCS7A01G271700 TraesCS4B01G133100 TraesCS5B01G132400 TraesCS3D01G266400 TraesCS3B01G299800 TraesCS4A01G185600 TraesCSU01G211700 TraesCSU01G217800 TraesCS6B01G125700 TraesCS2D01G335700 Tr…
50790	regulation of catalytic activity	2.371e-08	2.0353e-06	68/1525 4.4%	103/3886 2.6%	TraesCS4A01G365300 TraesCS3B01G351100 TraesCS2A01G025400 TraesCS3B01G183400 TraesCS5D01G144600 TraesCS2D01G225300 TraesCS5A01G216500 TraesCS7A01G533600 TraesCS6D01G133200 TraesCS7B01G067700 TraesCS5D01G224600 TraesCS4D01G189100 TraesCS2B01G245000 TraesCS7D01G521000 Triticum_aestivum_newGene_35561 TraesCS2A01G408900 TraesCS7B01G293200 TraesCS1B01G251400 TraesCS3A01G315800 TraesCS2A01G219400 TraesC…
51234	establishment of localization	2.7713e-08	2.2874e-06	215/1525 14.0%	415/3886 10.6%	TraesCS3D01G343500 TraesCS7A01G490500 TraesCS2B01G232400 TraesCS4D01G195500 TraesCS1B01G315900 Triticum_aestivum_newGene_51898 TraesCS3B01G298700 TraesCS1A01G410200 TraesCS4A01G388100 TraesCS2B01G430000 TraesCS5A01G155300 TraesCS7D01G221900 TraesCS3B01G322900 TraesCS5D01G300800 TraesCS2B01G258900 TraesCS6D01G085200 TraesCS1D01G304800 TraesCS4B01G133100 TraesCS3A01G252300 Triticum_aestivum_newGene…
51179	localization	3.8508e-08	3.0607e-06	218/1525 14.2%	423/3886 10.8%	TraesCS3D01G343500 TraesCS7A01G490500 TraesCS2B01G232400 TraesCS4D01G195500 TraesCS1B01G315900 Triticum_aestivum_newGene_51898 TraesCS3B01G298700 TraesCS1A01G410200 TraesCS4A01G388100 TraesCS2B01G430000 TraesCS5A01G155300 TraesCS7D01G221900 TraesCS3B01G322900 TraesCS5D01G300800 TraesCS2B01G258900 TraesCS6D01G085200 TraesCS1D01G304800 TraesCS4B01G133100 TraesCS3A01G252300 Triticum_aestivum_newGene…
904	cell morphogenesis involved in differentiation	4.4692e-08	3.4253e-06	38/1525 2.4%	49/3886 1.2%	TraesCS6D01G189200 TraesCS6D01G281900 TraesCS1B01G420200 TraesCS7D01G272000 TraesCS6A01G200700 TraesCS4B01G002300 TraesCS7D01G354500 TraesCS6D01G183300 TraesCS3B01G183500 TraesCS3D01G270200 TraesCS3A01G157100 TraesCS5A01G132500 TraesCS7B01G170300 TraesCS4D01G001000 TraesCS1D01G144300 TraesCS1D01G400200 TraesCS6A01G196000 TraesCS4A01G001100 TraesCSU01G211800 TraesCS3B01G331000 TraesCS7B01G260100 T…
21700	developmental maturation	4.6852e-08	3.4671e-06	32/1525 2.0%	39/3886 1.0%	TraesCS6D01G281900 TraesCS6A01G202800 TraesCS1B01G420200 TraesCS6D01G149600 TraesCS2A01G327200 TraesCS6D01G183300 TraesCS6A01G097200 TraesCS3D01G270200 TraesCS1D01G400200 TraesCS6A01G196000 TraesCSU01G211800 TraesCS3B01G331000 TraesCS3D01G151400 TraesCS6D01G085200 TraesCS7A01G378700 TraesCS1A01G392100 TraesCS6D01G188300 TraesCS3A01G270400 TraesCSU01G211700 TraesCSU01G217800 TraesCS6B01G125700 Tra…
60560	developmental growth involved in morphogenesis	9.8192e-08	7.024e-06	46/1525 3.0%	64/3886 1.6%	TraesCS6D01G189200 TraesCS6D01G281900 TraesCS1B01G420200 TraesCS7D01G272000 TraesCS6A01G200700 TraesCS2D01G342500 TraesCS4B01G002300 TraesCS2A01G327200 TraesCS7D01G354500 TraesCS6D01G183300 TraesCS2A01G321100 TraesCS3B01G183500 TraesCS6A01G097200 TraesCS3D01G270200 TraesCS3A01G157100 TraesCS5A01G132500 TraesCS7B01G170300 TraesCS4D01G001000 TraesCS1D01G144300 TraesCS1D01G400200 TraesCS6A01G196000 …
30695	GTPase regulator activity	1.1471e-07	7.2103e-06	22/1525 1.4%	24/3886 0.6%	TraesCSU01G211800 TraesCS3B01G331000 TraesCS3B01G548000 TraesCS1B01G420200 TraesCS1B01G251400 TraesCS2A01G219400 TraesCS1A01G392100 TraesCS6D01G183300 TraesCS3A01G270400 TraesCSU01G211700 TraesCSU01G217800 TraesCS2D01G225300 TraesCS3D01G296400 TraesCS3D01G270200 Triticum_aestivum_newGene_27700 TraesCS3A01G305500 Triticum_aestivum_newGene_28357 TraesCS2B01G245000 TraesCS1D01G400200 TraesCS6A01G196…
60589	nucleoside-triphosphatase regulator activity	1.1471e-07	7.2103e-06	22/1525 1.4%	24/3886 0.6%	TraesCSU01G211800 TraesCS3B01G331000 TraesCS3B01G548000 TraesCS1B01G420200 TraesCS1B01G251400 TraesCS2A01G219400 TraesCS1A01G392100 TraesCS6D01G183300 TraesCS3A01G270400 TraesCSU01G211700 TraesCSU01G217800 TraesCS2D01G225300 TraesCS3D01G296400 TraesCS3D01G270200 Triticum_aestivum_newGene_27700 TraesCS3A01G305500 Triticum_aestivum_newGene_28357 TraesCS2B01G245000 TraesCS1D01G400200 TraesCS6A01G196…
71555	cell wall organization	1.1627e-07	7.2103e-06	38/1525 2.4%	50/3886 1.2%	TraesCS6D01G281900 TraesCS5A01G450600 Triticum_aestivum_newGene_42883 TraesCS4D01G021300 TraesCS3B01G051000 TraesCS5B01G458900 TraesCS7A01G136600 TraesCS7D01G136500 TraesCS3B01G051500 TraesCS3B01G051200 TraesCS5A01G216500 TraesCS5B01G092700 TraesCS5A01G132500 TraesCS4A01G116700 TraesCS7B01G037700 TraesCS5D01G224600 TraesCS1D01G144300 TraesCS4D01G189100 TraesCS5B01G215400 TraesCS2A01G521900 TraesC…
5088	Ras guanyl-nucleotide exchange factor activity	1.176e-07	7.2103e-06	17/1525 1.1%	17/3886 0.4%	TraesCSU01G211800 TraesCS3B01G331000 TraesCS1B01G420200 TraesCS1A01G392100 TraesCS6D01G183300 TraesCS3A01G270400 TraesCSU01G211700 TraesCSU01G217800 TraesCS3D01G296400 TraesCS3D01G270200 Triticum_aestivum_newGene_27700 TraesCS3A01G305500 Triticum_aestivum_newGene_28357 TraesCS1D01G400200 TraesCS6A01G196000 Triticum_aestivum_newGene_27701 TraesCS3B01G304200
5089	Rho guanyl-nucleotide exchange factor activity	1.176e-07	7.2103e-06	17/1525 1.1%	17/3886 0.4%	TraesCSU01G211800 TraesCS3B01G331000 TraesCS1B01G420200 TraesCS1A01G392100 TraesCS6D01G183300 TraesCS3A01G270400 TraesCSU01G211700 TraesCSU01G217800 TraesCS3D01G296400 TraesCS3D01G270200 Triticum_aestivum_newGene_27700 TraesCS3A01G305500 Triticum_aestivum_newGene_28357 TraesCS1D01G400200 TraesCS6A01G196000 Triticum_aestivum_newGene_27701 TraesCS3B01G304200
65009	regulation of molecular function	1.3106e-07	7.8124e-06	68/1525 4.4%	106/3886 2.7%	TraesCS4A01G365300 TraesCS3B01G351100 TraesCS2A01G025400 TraesCS3B01G183400 TraesCS5D01G144600 TraesCS2D01G225300 TraesCS5A01G216500 TraesCS7A01G533600 TraesCS6D01G133200 TraesCS7B01G067700 TraesCS5D01G224600 TraesCS4D01G189100 TraesCS2B01G245000 TraesCS7D01G521000 Triticum_aestivum_newGene_35561 TraesCS2A01G408900 TraesCS7B01G293200 TraesCS1B01G251400 TraesCS3A01G315800 TraesCS2A01G219400 TraesC…
6468	protein amino acid phosphorylation	1.8953e-07	1.0993e-05	160/1525 10.4%	300/3886 7.7%	TraesCS2B01G553400 TraesCS4D01G149200 TraesCS7B01G131000 TraesCS7D01G409400 TraesCS3B01G355700 TraesCS7D01G050100 TraesCS4A01G145600 TraesCS7B01G066500 TraesCS3A01G326400 TraesCS1D01G187400 TraesCS3A01G306000 TraesCS7A01G155200 TraesCS5B01G137600 TraesCS1B01G355800 TraesCS6A01G182800 TraesCS7B01G146500 TraesCS3D01G295900 TraesCS4A01G001100 TraesCS1A01G014500 TraesCS7D01G357700 TraesCS2B01G474600 …
16020	membrane	2.7135e-07	1.5324e-05	474/1525 31.0%	1034/3886 26.6%	TraesCS3D01G343500 TraesCS5B01G200600 TraesCS3D01G070700 Triticum_aestivum_newGene_36023 TraesCS7A01G490500 TraesCS1B01G315900 TraesCS2D01G520500 Triticum_aestivum_newGene_51898 TraesCS4A01G388100 TraesCS7D01G067100 TraesCS2B01G430000 TraesCS5A01G155300 TraesCS7D01G221900 TraesCS5B01G383400 TraesCS5D01G300800 TraesCS4D01G314400 TraesCS4B01G133100 TraesCS4A01G185600 TraesCS6A01G154900 TraesCS7A01G…
9826	unidimensional cell growth	3.4089e-07	1.8758e-05	44/1525 2.8%	62/3886 1.5%	TraesCS6D01G189200 TraesCS6D01G281900 TraesCS1B01G420200 TraesCS7D01G272000 TraesCS6A01G200700 TraesCS4B01G002300 TraesCS2A01G327200 TraesCS7D01G354500 TraesCS6D01G183300 TraesCS3B01G183500 TraesCS6A01G097200 TraesCS3D01G270200 TraesCS3A01G157100 TraesCS5A01G132500 TraesCS7B01G170300 TraesCS4D01G001000 TraesCS1D01G144300 TraesCS1D01G400200 TraesCS6A01G196000 TraesCS4A01G001100 TraesCSU01G211800 T…
902	cell morphogenesis	4.7718e-07	2.5601e-05	47/1525 3.0%	68/3886 1.7%	TraesCS6D01G189200 TraesCS6D01G281900 TraesCS1B01G420200 TraesCS7D01G272000 TraesCS6A01G200700 TraesCS4B01G002300 TraesCS2A01G327200 TraesCS7D01G354500 TraesCS6D01G183300 TraesCS3B01G183500 TraesCS6A01G097200 TraesCS3D01G270200 TraesCS3B01G106700 TraesCS3A01G157100 TraesCS5A01G132500 TraesCS1B01G166800 TraesCS7B01G170300 TraesCS4D01G001000 TraesCS1D01G144300 TraesCS1D01G400200 TraesCS6A01G196000 …
48469	cell maturation	6.2396e-07	3.0651e-05	27/1525 1.7%	33/3886 0.8%	TraesCS6D01G281900 TraesCS6A01G202800 TraesCS1B01G420200 TraesCS2A01G327200 TraesCS6D01G183300 TraesCS6A01G097200 TraesCS3D01G270200 TraesCS1D01G400200 TraesCS6A01G196000 TraesCSU01G211800 TraesCS3B01G331000 TraesCS3D01G151400 TraesCS6D01G085200 TraesCS1A01G392100 TraesCS6D01G188300 TraesCS3A01G270400 TraesCSU01G211700 TraesCSU01G217800 TraesCS6B01G125700 TraesCS3D01G296400 TraesCS2D01G335700 Tra…
48764	trichoblast maturation	6.2396e-07	3.0651e-05	27/1525 1.7%	33/3886 0.8%	TraesCS6D01G281900 TraesCS6A01G202800 TraesCS1B01G420200 TraesCS2A01G327200 TraesCS6D01G183300 TraesCS6A01G097200 TraesCS3D01G270200 TraesCS1D01G400200 TraesCS6A01G196000 TraesCSU01G211800 TraesCS3B01G331000 TraesCS3D01G151400 TraesCS6D01G085200 TraesCS1A01G392100 TraesCS6D01G188300 TraesCS3A01G270400 TraesCSU01G211700 TraesCSU01G217800 TraesCS6B01G125700 TraesCS3D01G296400 TraesCS2D01G335700 Tra…
48765	root hair cell differentiation	6.2396e-07	3.0651e-05	27/1525 1.7%	33/3886 0.8%	TraesCS6D01G281900 TraesCS6A01G202800 TraesCS1B01G420200 TraesCS2A01G327200 TraesCS6D01G183300 TraesCS6A01G097200 TraesCS3D01G270200 TraesCS1D01G400200 TraesCS6A01G196000 TraesCSU01G211800 TraesCS3B01G331000 TraesCS3D01G151400 TraesCS6D01G085200 TraesCS1A01G392100 TraesCS6D01G188300 TraesCS3A01G270400 TraesCSU01G211700 TraesCSU01G217800 TraesCS6B01G125700 TraesCS3D01G296400 TraesCS2D01G335700 Tra…
4672	protein kinase activity	6.2844e-07	3.0651e-05	168/1525 11.0%	322/3886 8.2%	TraesCS2B01G553400 TraesCS3B01G363600 TraesCS4D01G149200 TraesCS7B01G131000 TraesCS7D01G409400 TraesCS3B01G355700 TraesCS7D01G050100 TraesCS4A01G145600 TraesCS7B01G066500 TraesCS3A01G326400 TraesCS2A01G218600 TraesCS1D01G187400 TraesCS3A01G306000 TraesCS7A01G155200 TraesCS5B01G137600 TraesCS1B01G355800 TraesCS6A01G182800 TraesCS7B01G146500 TraesCS4B01G000300 TraesCS3D01G295900 TraesCS3A01G006900 …
42545	cell wall modification	8.4392e-07	4.0245e-05	31/1525 2.0%	40/3886 1.0%	TraesCS6D01G281900 TraesCS5A01G450600 Triticum_aestivum_newGene_42883 TraesCS4D01G021300 TraesCS5B01G458900 TraesCS5A01G216500 TraesCS5B01G092700 TraesCS5A01G132500 TraesCS4A01G116700 TraesCS5D01G224600 TraesCS1D01G144300 TraesCS4D01G189100 TraesCS5B01G215400 TraesCS2A01G521900 TraesCS2D01G317900 TraesCS4B01G187700 TraesCS4A01G201200 TraesCS4B01G133100 TraesCS5B01G132400 TraesCS4A01G290500 TraesC…
16311	dephosphorylation	9.1809e-07	4.2831e-05	28/1525 1.8%	35/3886 0.9%	TraesCS7D01G417600 TraesCS6D01G281900 TraesCS6A01G202800 TraesCS5B01G078500 Triticum_aestivum_newGene_43213 TraesCS7D01G169300 TraesCS5D01G144600 TraesCS7B01G326200 Triticum_aestivum_newGene_56517 TraesCS7A01G533600 TraesCS5B01G146700 TraesCS7A01G168400 TraesCS4D01G282700 TraesCS7D01G521000 TraesCS7B01G073200 TraesCS3D01G157700 TraesCS3D01G206300 Triticum_aestivum_newGene_61894 TraesCS3A01G149800…
4674	protein serine/threonine kinase activity	1.0636e-06	4.8566e-05	134/1525 8.7%	249/3886 6.4%	TraesCS4D01G149200 TraesCS7B01G131000 TraesCS7D01G409400 TraesCS3B01G355700 TraesCS7D01G050100 TraesCS4A01G145600 TraesCS7B01G066500 TraesCS3A01G326400 TraesCS2A01G218600 TraesCS1D01G187400 TraesCS3A01G306000 TraesCS7A01G155200 TraesCS5B01G137600 TraesCS6A01G182800 TraesCS7B01G146500 TraesCS3D01G295900 TraesCS4A01G001100 TraesCS1A01G014500 TraesCS7D01G357700 TraesCS2B01G474600 TraesCS3D01G151500 …
16791	phosphatase activity	1.1529e-06	5.1545e-05	42/1525 2.7%	60/3886 1.5%	TraesCS7D01G417600 TraesCS6A01G202800 TraesCS2A01G130200 TraesCS6B01G220000 TraesCS5B01G078500 TraesCS1A01G095500 Triticum_aestivum_newGene_43213 TraesCS7D01G169300 TraesCS5D01G089100 TraesCS6D01G388000 TraesCS2D01G132200 TraesCS5D01G144600 TraesCS7B01G326200 Triticum_aestivum_newGene_56517 TraesCS7A01G533600 TraesCS1B01G128100 TraesCS5B01G146700 TraesCS6B01G449000 TraesCS1D01G104400 TraesCS7A01G…
5085	guanyl-nucleotide exchange factor activity	1.3375e-06	5.8578e-05	17/1525 1.1%	18/3886 0.4%	TraesCSU01G211800 TraesCS3B01G331000 TraesCS1B01G420200 TraesCS1A01G392100 TraesCS6D01G183300 TraesCS3A01G270400 TraesCSU01G211700 TraesCSU01G217800 TraesCS3D01G296400 TraesCS3D01G270200 Triticum_aestivum_newGene_27700 TraesCS3A01G305500 Triticum_aestivum_newGene_28357 TraesCS1D01G400200 TraesCS6A01G196000 Triticum_aestivum_newGene_27701 TraesCS3B01G304200
48610	reproductive cellular process	1.7725e-06	7.6076e-05	47/1525 3.0%	70/3886 1.8%	TraesCS7A01G549700 TraesCS6D01G189200 TraesCS6D01G281900 TraesCS1B01G420200 TraesCS7D01G272000 TraesCS6A01G200700 TraesCS4B01G002300 TraesCS7B01G473200 TraesCS7D01G354500 TraesCS6D01G183300 TraesCS3B01G183500 TraesCS3D01G270200 TraesCS3A01G157100 TraesCS5A01G132500 TraesCS7B01G170300 TraesCS4D01G001000 TraesCS1D01G144300 TraesCS1D01G400200 TraesCS6A01G196000 TraesCS4A01G322400 TraesCS4A01G001100 …
6470	protein amino acid dephosphorylation	1.8402e-06	7.7431e-05	24/1525 1.5%	29/3886 0.7%	TraesCS7D01G521000 TraesCS7D01G417600 TraesCS7B01G073200 TraesCS3D01G157700 TraesCS6A01G202800 TraesCS3D01G206300 Triticum_aestivum_newGene_61894 TraesCS5B01G078500 Triticum_aestivum_newGene_43213 TraesCS7D01G169300 TraesCS3A01G149800 TraesCS6D01G188300 TraesCS5D01G144600 TraesCS4D01G087200 TraesCS7B01G326200 Triticum_aestivum_newGene_56517 TraesCS7A01G533600 TraesCS7B01G450800 TraesCS5B01G146700…
80147	root hair cell development	1.9812e-06	8.1763e-05	14/1525 0.9%	14/3886 0.3%	TraesCSU01G211800 TraesCS3B01G331000 TraesCS1B01G420200 TraesCS1A01G392100 TraesCS6D01G183300 TraesCS3A01G270400 TraesCSU01G211700 TraesCSU01G217800 TraesCS3D01G296400 TraesCS3D01G270200 TraesCS3A01G305500 TraesCS1D01G400200 TraesCS6A01G196000 TraesCS3B01G304200
32989	cellular component morphogenesis	3.2717e-06	0.00013247	47/1525 3.0%	71/3886 1.8%	TraesCS6D01G189200 TraesCS6D01G281900 TraesCS1B01G420200 TraesCS7D01G272000 TraesCS6A01G200700 TraesCS4B01G002300 TraesCS2A01G327200 TraesCS7D01G354500 TraesCS6D01G183300 TraesCS3B01G183500 TraesCS6A01G097200 TraesCS3D01G270200 TraesCS3B01G106700 TraesCS3A01G157100 TraesCS5A01G132500 TraesCS1B01G166800 TraesCS7B01G170300 TraesCS4D01G001000 TraesCS1D01G144300 TraesCS1D01G400200 TraesCS6A01G196000 …
42578	phosphoric ester hydrolase activity	4.0385e-06	0.00016049	53/1525 3.4%	83/3886 2.1%	TraesCS5B01G200600 TraesCS2A01G130200 TraesCS5B01G078500 TraesCS1A01G095500 TraesCS5D01G089100 TraesCS6D01G388000 TraesCS5D01G144600 TraesCS7D01G263700 Triticum_aestivum_newGene_56517 TraesCS7A01G533600 TraesCSU01G038600 TraesCS7A01G168400 TraesCS4D01G282700 TraesCS2A01G403000 TraesCS5A01G327600 TraesCS7D01G521000 TraesCS3D01G206300 TraesCS3A01G149800 TraesCS2D01G582400 TraesCS3B01G226800 TraesCS…
30234	enzyme regulator activity	9.2692e-06	0.00036167	44/1525 2.8%	67/3886 1.7%	TraesCS3B01G548000 TraesCS4A01G365300 TraesCS5A01G450600 TraesCS1B01G420200 TraesCS5B01G458900 TraesCS1B01G147900 TraesCS6D01G183300 TraesCS2D01G225300 TraesCS3D01G270200 TraesCS5A01G216500 TraesCS4A01G116700 TraesCS5D01G224600 TraesCS4D01G189100 TraesCS5B01G215400 TraesCS2B01G245000 TraesCS1D01G400200 TraesCS2A01G521900 TraesCS2D01G317900 TraesCS6A01G196000 Triticum_aestivum_newGene_14188 TraesC…
10054	trichoblast differentiation	1.3092e-05	0.00050171	27/1525 1.7%	36/3886 0.9%	TraesCS6D01G281900 TraesCS6A01G202800 TraesCS1B01G420200 TraesCS2A01G327200 TraesCS6D01G183300 TraesCS6A01G097200 TraesCS3D01G270200 TraesCS1D01G400200 TraesCS6A01G196000 TraesCSU01G211800 TraesCS3B01G331000 TraesCS3D01G151400 TraesCS6D01G085200 TraesCS1A01G392100 TraesCS6D01G188300 TraesCS3A01G270400 TraesCSU01G211700 TraesCSU01G217800 TraesCS6B01G125700 TraesCS3D01G296400 TraesCS2D01G335700 Tra…
45330	aspartyl esterase activity	1.5346e-05	0.00056781	18/1525 1.1%	21/3886 0.5%	TraesCS5A01G450600 Triticum_aestivum_newGene_42883 TraesCS4B01G187700 TraesCS5B01G458900 TraesCS2D01G523700 TraesCS5A01G216500 TraesCS5D01G460500 TraesCS5B01G092700 TraesCS5D01G099300 TraesCS2D01G381300 TraesCS4A01G116700 TraesCS5D01G224600 TraesCS4D01G189100 TraesCS5B01G215400 TraesCS2A01G521900 TraesCS2D01G317900 Triticum_aestivum_newGene_34595 Triticum_aestivum_newGene_57499
71669	plant-type cell wall organization or biogenesis	1.5346e-05	0.00056781	18/1525 1.1%	21/3886 0.5%	TraesCS6D01G281900 TraesCS4B01G133100 TraesCS3B01G051000 TraesCS2B01G144900 TraesCS5B01G132400 TraesCS7A01G136600 TraesCS7D01G136500 TraesCS3B01G051500 TraesCS4A01G185600 TraesCS3B01G051200 TraesCS3B01G051600 TraesCS5D01G140700 TraesCS5A01G132500 TraesCS4D01G244000 TraesCS7B01G037700 TraesCS6A01G302400 TraesCS1D01G144300 TraesCS6B01G331600
71554	cell wall organization or biogenesis	1.7628e-05	0.00064119	47/1525 3.0%	74/3886 1.9%	TraesCS6D01G281900 TraesCS5A01G450600 Triticum_aestivum_newGene_42883 TraesCS4D01G021300 TraesCS3B01G051000 TraesCS2B01G144900 TraesCS5B01G458900 TraesCS7A01G136600 TraesCS7D01G136500 TraesCS3B01G051500 TraesCS7D01G171900 TraesCS3B01G051200 TraesCS2A01G523300 TraesCS5A01G216500 TraesCS5B01G092700 Triticum_aestivum_newGene_24981 TraesCS5A01G132500 TraesCS4D01G244000 TraesCS4A01G116700 TraesCS7B01G…
51704	multi-organism process	1.9429e-05	0.00069492	107/1525 7.0%	200/3886 5.1%	TraesCS2B01G144900 TraesCS1A01G410200 TraesCS6D01G183300 TraesCS3D01G270200 TraesCS1D01G012000 TraesCS1B01G053600 TraesCS1D01G400200 TraesCS2A01G403000 TraesCS4A01G001100 TraesCS1A01G014500 TraesCS4B01G078000 TraesCS7D01G460200 TraesCS7A01G271700 TraesCS4B01G133100 TraesCS7B01G365700 TraesCS4A01G185600 TraesCS7A01G368400 TraesCS7B01G502200 TraesCS5A01G406600 TraesCS7A01G473200 TraesCS4B01G018900 …
10053	root epidermal cell differentiation	3.0415e-05	0.00107	27/1525 1.7%	37/3886 0.9%	TraesCS6D01G281900 TraesCS6A01G202800 TraesCS1B01G420200 TraesCS2A01G327200 TraesCS6D01G183300 TraesCS6A01G097200 TraesCS3D01G270200 TraesCS1D01G400200 TraesCS6A01G196000 TraesCSU01G211800 TraesCS3B01G331000 TraesCS3D01G151400 TraesCS6D01G085200 TraesCS1A01G392100 TraesCS6D01G188300 TraesCS3A01G270400 TraesCSU01G211700 TraesCSU01G217800 TraesCS6B01G125700 TraesCS3D01G296400 TraesCS2D01G335700 Tra…
30599	pectinesterase activity	4.0509e-05	0.0014021	24/1525 1.5%	32/3886 0.8%	TraesCS4A01G365300 TraesCS1B01G383000 TraesCS5A01G450600 Triticum_aestivum_newGene_42883 TraesCS4B01G187700 TraesCS5B01G458900 TraesCS1B01G147900 TraesCS5B01G508000 TraesCS2D01G523700 TraesCS5A01G216500 TraesCS5D01G460500 TraesCS5B01G092700 TraesCS5D01G099300 TraesCS2D01G381300 TraesCS1A01G365500 TraesCS4A01G116700 TraesCS5D01G224600 TraesCS4D01G189100 TraesCS5B01G215400 TraesCS5D01G508100 TraesC…
6464	protein modification process	4.1916e-05	0.0014278	229/1525 15.0%	481/3886 12.3%	TraesCS2B01G553400 TraesCS3B01G355700 TraesCS7D01G050100 TraesCS4A01G145600 TraesCS3A01G326400 TraesCS1D01G187400 TraesCS3A01G306000 TraesCS5D01G144600 TraesCS7A01G155200 TraesCS4A01G388100 TraesCS5B01G137600 TraesCS1B01G355800 TraesCS6A01G182800 TraesCS3D01G295900 TraesCS7A01G168400 TraesCS4D01G282700 TraesCS2A01G403000 TraesCS7D01G357700 TraesCS2B01G474600 TraesCS6A01G154900 TraesCS3B01G259100 …
43687	post-translational protein modification	4.4655e-05	0.0014724	222/1525 14.5%	465/3886 11.9%	TraesCS2B01G553400 TraesCS3B01G355700 TraesCS7D01G050100 TraesCS4A01G145600 TraesCS3A01G326400 TraesCS1D01G187400 TraesCS3A01G306000 TraesCS5D01G144600 TraesCS7A01G155200 TraesCS4A01G388100 TraesCS5B01G137600 TraesCS1B01G355800 TraesCS6A01G182800 TraesCS3D01G295900 TraesCS7A01G168400 TraesCS4D01G282700 TraesCS7D01G357700 TraesCS2B01G474600 TraesCS6A01G154900 TraesCS3B01G259100 TraesCS7A01G423900 …
43086	negative regulation of catalytic activity	4.5282e-05	0.0014724	41/1525 2.6%	64/3886 1.6%	TraesCS4A01G365300 TraesCS5A01G450600 TraesCS5B01G458900 TraesCS2D01G027400 TraesCS1D01G189400 TraesCS1B01G147900 TraesCS2A01G025400 TraesCS4A01G352800 TraesCS1B01G195100 TraesCS5A01G216500 TraesCS7A01G533600 TraesCS4A01G116700 TraesCS5D01G224600 TraesCS4D01G189100 TraesCS5B01G215400 TraesCS2A01G521900 TraesCS2D01G317900 TraesCS1D01G234500 Triticum_aestivum_newGene_14188 TraesCS7D01G521000 TraesC…
44092	negative regulation of molecular function	4.5282e-05	0.0014724	41/1525 2.6%	64/3886 1.6%	TraesCS4A01G365300 TraesCS5A01G450600 TraesCS5B01G458900 TraesCS2D01G027400 TraesCS1D01G189400 TraesCS1B01G147900 TraesCS2A01G025400 TraesCS4A01G352800 TraesCS1B01G195100 TraesCS5A01G216500 TraesCS7A01G533600 TraesCS4A01G116700 TraesCS5D01G224600 TraesCS4D01G189100 TraesCS5B01G215400 TraesCS2A01G521900 TraesCS2D01G317900 TraesCS1D01G234500 Triticum_aestivum_newGene_14188 TraesCS7D01G521000 TraesC…
7165	signal transduction	4.6992e-05	0.0015052	43/1525 2.8%	68/3886 1.7%	TraesCS3A01G364100 Triticum_aestivum_newGene_64014 TraesCS3A01G228000 TraesCS3B01G256700 TraesCS6D01G149600 TraesCS3B01G260900 TraesCS3A01G306000 TraesCS5D01G188900 TraesCS5A01G184100 TraesCS7A01G285200 TraesCS3B01G330500 TraesCS5D01G292500 TraesCS7A01G533600 TraesCS3D01G295900 TraesCS7D01G289000 TraesCS4B01G233600 TraesCS3A01G340000 TraesCS7D01G521000 TraesCS3D01G157700 TraesCS2D01G106900 TraesC…
44425	membrane part	4.8374e-05	0.0015266	258/1525 16.9%	550/3886 14.1%	TraesCS3D01G343500 TraesCS3D01G070700 Triticum_aestivum_newGene_36023 TraesCS7A01G490500 TraesCS2B01G232400 TraesCS4B01G356000 TraesCS4D01G195500 TraesCS2B01G144900 TraesCS1A01G410200 TraesCS5D01G444900 TraesCS4A01G388100 TraesCS7D01G067100 TraesCS2B01G430000 TraesCS5A01G155300 Triticum_aestivum_newGene_22543 TraesCS5D01G300800 TraesCS4D01G314400 TraesCS5D01G015200 TraesCS4B01G133100 TraesCS6A01G…
3824	catalytic activity	5.1838e-05	0.0016122	767/1525 50.2%	1803/3886 46.3%	TraesCS2D01G403200 TraesCS5B01G200600 TraesCS3D01G070700 TraesCS3B01G533800 TraesCS5D01G089100 TraesCS3A01G326400 TraesCS2A01G218600 TraesCS7A01G155200 TraesCS4A01G388100 TraesCS2B01G538800 TraesCS2B01G430000 TraesCS7A01G405000 TraesCS1B01G311300 TraesCS7A01G051100 TraesCS5A01G329700 TraesCS2D01G166600 TraesCS4A01G263200 TraesCS7A01G168400 TraesCS4D01G282700 TraesCS4D01G314400 TraesCS7A01G009800 …
30154	cell differentiation	5.7888e-05	0.0017747	61/1525 4.0%	105/3886 2.7%	TraesCS6D01G189200 TraesCS2A01G327200 TraesCS7B01G026000 TraesCS6D01G183300 TraesCS2A01G321100 TraesCS3D01G270200 TraesCS7A01G126600 TraesCS3A01G157100 TraesCS5A01G132500 TraesCS1B01G166800 TraesCS1D01G400200 TraesCS7D01G124500 TraesCS7B01G025900 TraesCS4A01G001100 TraesCS3B01G331000 TraesCS6D01G085200 TraesCS7A01G271700 TraesCS4B01G133100 TraesCS5B01G132400 TraesCS4A01G185600 TraesCSU01G211700 T…
23034	intracellular signaling pathway	6.1587e-05	0.0018615	34/1525 2.2%	51/3886 1.3%	TraesCS3A01G364100 Triticum_aestivum_newGene_64014 TraesCS3A01G228000 TraesCS3B01G256700 TraesCS6D01G149600 TraesCS3B01G260900 TraesCS5D01G188900 TraesCS5A01G184100 TraesCS7A01G285200 TraesCS7A01G533600 TraesCS7B01G067700 TraesCS7D01G289000 TraesCS4B01G233600 TraesCS3A01G340000 TraesCS7D01G521000 TraesCS3D01G157700 TraesCS5B01G182200 TraesCS7A01G378700 TraesCS7B01G210400 TraesCS3A01G149800 TraesC…
9664	plant-type cell wall organization	7.4361e-05	0.0022164	16/1525 1.0%	19/3886 0.4%	TraesCS6D01G281900 TraesCS4B01G133100 TraesCS3B01G051000 TraesCS5B01G132400 TraesCS7A01G136600 TraesCS7D01G136500 TraesCS3B01G051500 TraesCS4A01G185600 TraesCS3B01G051200 TraesCS3B01G051600 TraesCS5D01G140700 TraesCS5A01G132500 TraesCS7B01G037700 TraesCS6A01G302400 TraesCS1D01G144300 TraesCS6B01G331600
30258	lipid modification	7.5922e-05	0.0022319	19/1525 1.2%	24/3886 0.6%	TraesCS6D01G281900 TraesCS7A01G383300 TraesCS7B01G286200 TraesCS4B01G133100 TraesCS5B01G132400 TraesCS4A01G143600 TraesCS6D01G352200 TraesCS7D01G379800 TraesCS4A01G185600 TraesCS4D01G161900 TraesCS4B01G152500 TraesCS4B01G157800 TraesCS5D01G140700 TraesCS5A01G132500 TraesCS6A01G302400 TraesCS6B01G404700 TraesCS4D01G128000 TraesCS6A01G368700 TraesCS6B01G331600
23046	signaling process	7.8111e-05	0.002235	45/1525 2.9%	73/3886 1.8%	TraesCS3A01G364100 Triticum_aestivum_newGene_64014 TraesCS3A01G228000 TraesCS6B01G184800 TraesCS3B01G256700 TraesCS6D01G149600 TraesCS3B01G260900 TraesCS3A01G306000 TraesCS5D01G188900 TraesCS5A01G184100 TraesCS7A01G285200 TraesCS3B01G330500 TraesCS5D01G292500 TraesCS7A01G533600 TraesCS3D01G295900 TraesCS7D01G289000 TraesCS4B01G233600 TraesCS3A01G340000 TraesCS7D01G521000 TraesCS3D01G157700 TraesC…
23060	signal transmission	7.8111e-05	0.002235	45/1525 2.9%	73/3886 1.8%	TraesCS3A01G364100 Triticum_aestivum_newGene_64014 TraesCS3A01G228000 TraesCS6B01G184800 TraesCS3B01G256700 TraesCS6D01G149600 TraesCS3B01G260900 TraesCS3A01G306000 TraesCS5D01G188900 TraesCS5A01G184100 TraesCS7A01G285200 TraesCS3B01G330500 TraesCS5D01G292500 TraesCS7A01G533600 TraesCS3D01G295900 TraesCS7D01G289000 TraesCS4B01G233600 TraesCS3A01G340000 TraesCS7D01G521000 TraesCS3D01G157700 TraesC…
6631	fatty acid metabolic process	8.9007e-05	0.0024806	30/1525 1.9%	44/3886 1.1%	TraesCS1A01G213000 TraesCS7A01G383300 TraesCS7B01G286200 TraesCS1B01G046200 TraesCS1A01G410100 TraesCS1A01G410200 TraesCS3D01G083400 TraesCS7D01G379800 TraesCS7A01G561600 Triticum_aestivum_newGene_27892 TraesCS1D01G037900 TraesCS3A01G082700 TraesCS6B01G395700 TraesCS6A01G368700 TraesCS1D01G215900 TraesCS4D01G314400 TraesCS7D01G548200 TraesCS6D01G352200 TraesCS3B01G097800 TraesCS4B01G076000 TraesC…
35556	intracellular signal transduction	8.9007e-05	0.0024806	30/1525 1.9%	44/3886 1.1%	TraesCS3A01G364100 Triticum_aestivum_newGene_64014 TraesCS3A01G228000 TraesCS3B01G256700 TraesCS6D01G149600 TraesCS3B01G260900 TraesCS5D01G188900 TraesCS5A01G184100 TraesCS7A01G285200 TraesCS7A01G533600 TraesCS7D01G289000 TraesCS4B01G233600 TraesCS3A01G340000 TraesCS7D01G521000 TraesCS3D01G157700 TraesCS5B01G182200 TraesCS7A01G378700 TraesCS3A01G149800 TraesCS4A01G077500 TraesCS2D01G226300 TraesC…
6835	dicarboxylic acid transport	0.00010802	0.0029344	12/1525 0.7%	13/3886 0.3%	TraesCS4B01G193900 Triticum_aestivum_newGene_12749 TraesCS5D01G270600 TraesCS5D01G307000 TraesCS5B01G243600 TraesCS7D01G221900 TraesCS5A01G246300 TraesCS5D01G252800 TraesCS4D01G194800 TraesCS5B01G300300 TraesCS3B01G213600 Triticum_aestivum_newGene_12748
7264	small GTPase mediated signal transduction	0.00010802	0.0029344	12/1525 0.7%	13/3886 0.3%	TraesCS2D01G226300 TraesCS3A01G364100 TraesCS3D01G357500 TraesCS3B01G396200 TraesCS5B01G182200 TraesCS2B01G246100 TraesCS7B01G200600 TraesCS7D01G289000 TraesCS5D01G188900 TraesCS2A01G220600 TraesCS5A01G184100 TraesCS7A01G285200
16044	cellular membrane organization	0.00011545	0.003097	35/1525 2.2%	54/3886 1.3%	TraesCS1B01G254000 TraesCS1D01G242500 TraesCS7A01G549700 TraesCS7A01G490500 TraesCS6D01G143700 TraesCS3B01G283800 TraesCS7B01G473200 TraesCS5A01G297400 TraesCS3D01G083400 TraesCS5A01G545700 TraesCS5A01G132500 TraesCS7D01G476900 TraesCS3A01G082700 TraesCS6B01G181800 TraesCS5A01G229500 TraesCS2A01G542800 TraesCS7B01G188800 TraesCSU01G129700 TraesCS7B01G186600 TraesCS4B01G133100 TraesCS7B01G210400 T…
43085	positive regulation of catalytic activity	0.00012594	0.0032959	21/1525 1.3%	28/3886 0.7%	Triticum_aestivum_newGene_16564 TraesCS7B01G293200 TraesCS3A01G315800 TraesCS3B01G351100 TraesCS2A01G219400 TraesCS5D01G144600 TraesCS7B01G197000 TraesCS2D01G225300 TraesCS7B01G067700 TraesCS7D01G387000 Triticum_aestivum_newGene_27700 TraesCS7B01G198600 Triticum_aestivum_newGene_28357 TraesCS5B01G146700 TraesCS2B01G245000 TraesCS6B01G428500 TraesCS3D01G315700 Triticum_aestivum_newGene_27701 Traes…
44093	positive regulation of molecular function	0.00012594	0.0032959	21/1525 1.3%	28/3886 0.7%	Triticum_aestivum_newGene_16564 TraesCS7B01G293200 TraesCS3A01G315800 TraesCS3B01G351100 TraesCS2A01G219400 TraesCS5D01G144600 TraesCS7B01G197000 TraesCS2D01G225300 TraesCS7B01G067700 TraesCS7D01G387000 Triticum_aestivum_newGene_27700 TraesCS7B01G198600 Triticum_aestivum_newGene_28357 TraesCS5B01G146700 TraesCS2B01G245000 TraesCS6B01G428500 TraesCS3D01G315700 Triticum_aestivum_newGene_27701 Traes…
31224	intrinsic to membrane	0.00013084	0.0033828	224/1525 14.6%	476/3886 12.2%	TraesCS3D01G343500 TraesCS3D01G070700 Triticum_aestivum_newGene_36023 TraesCS2B01G232400 TraesCS4B01G356000 TraesCS4D01G195500 TraesCS2B01G144900 TraesCS1A01G410200 TraesCS5D01G444900 TraesCS2B01G430000 TraesCS5A01G155300 Triticum_aestivum_newGene_22543 TraesCS5D01G300800 TraesCS4D01G314400 TraesCS5D01G015200 TraesCS6A01G306700 Triticum_aestivum_newGene_12748 TraesCS6A01G154900 TraesCS1B01G056700…
10015	root morphogenesis	0.00015783	0.0040323	29/1525 1.9%	43/3886 1.1%	TraesCS6D01G281900 TraesCS6A01G202800 TraesCS1B01G420200 TraesCS2A01G327200 TraesCS6D01G183300 TraesCS6A01G097200 TraesCS3D01G270200 TraesCS1D01G400200 TraesCS6A01G196000 TraesCSU01G211800 TraesCS3B01G331000 TraesCS3D01G151400 TraesCS6D01G085200 Triticum_aestivum_newGene_12363 TraesCS1A01G392100 TraesCS6D01G188300 TraesCS3A01G270400 TraesCSU01G211700 TraesCSU01G217800 TraesCS6B01G125700 TraesCS3D…
5509	calcium ion binding	0.0002025	0.0051126	42/1525 2.7%	69/3886 1.7%	TraesCS5D01G119100 TraesCS5B01G200600 TraesCS6D01G204000 TraesCS4D01G126100 TraesCS7A01G306000 TraesCS5B01G112900 TraesCS7D01G302700 TraesCS2A01G103600 TraesCS5B01G137600 TraesCS4B01G130300 TraesCS5A01G155300 TraesCS6B01G256200 TraesCS7B01G165200 TraesCS5D01G524800 TraesCS5A01G138300 TraesCS5D01G153800 TraesCS3A01G006700 TraesCS2D01G103400 TraesCS5B01G297700 TraesCS5D01G153400 TraesCS5A01G118200 …
46834	lipid phosphorylation	0.00021688	0.005289	13/1525 0.8%	15/3886 0.3%	TraesCS6D01G281900 TraesCS4B01G133100 TraesCS5B01G132400 TraesCS4A01G143600 TraesCS4A01G185600 TraesCS4D01G161900 TraesCS4B01G152500 TraesCS4B01G157800 TraesCS5D01G140700 TraesCS5A01G132500 TraesCS6A01G302400 TraesCS4D01G128000 TraesCS6B01G331600
46854	phosphoinositide phosphorylation	0.00021688	0.005289	13/1525 0.8%	15/3886 0.3%	TraesCS6D01G281900 TraesCS4B01G133100 TraesCS5B01G132400 TraesCS4A01G143600 TraesCS4A01G185600 TraesCS4D01G161900 TraesCS4B01G152500 TraesCS4B01G157800 TraesCS5D01G140700 TraesCS5A01G132500 TraesCS6A01G302400 TraesCS4D01G128000 TraesCS6B01G331600
43648	dicarboxylic acid metabolic process	0.00021688	0.005289	13/1525 0.8%	15/3886 0.3%	TraesCS5A01G229500 TraesCS1B01G254000 TraesCS1D01G242500 TraesCS7A01G465200 TraesCSU01G129700 TraesCS7D01G452900 TraesCS7B01G365700 TraesCS3D01G083400 TraesCS3B01G097800 TraesCS7B01G197000 TraesCS5A01G545700 TraesCS7B01G067700 TraesCS3A01G082700
5310	dicarboxylic acid transmembrane transporter activity	0.00025616	0.0061765	11/1525 0.7%	12/3886 0.3%	TraesCS4B01G193900 Triticum_aestivum_newGene_12749 TraesCS5D01G270600 TraesCS5D01G307000 TraesCS5B01G243600 TraesCS5A01G246300 TraesCS5D01G252800 TraesCS4D01G194800 TraesCS5B01G300300 TraesCS3B01G213600 Triticum_aestivum_newGene_12748
48869	cellular developmental process	0.00033085	0.0077831	69/1525 4.5%	127/3886 3.2%	TraesCS6D01G189200 TraesCS2B01G333500 TraesCS2A01G327200 TraesCS7B01G026000 TraesCS3B01G183400 TraesCS6D01G183300 TraesCS2A01G321100 TraesCS3D01G270200 TraesCS7A01G126600 TraesCS3A01G157100 TraesCS5A01G132500 TraesCS1B01G166800 TraesCS1D01G400200 TraesCS7D01G124500 TraesCS7B01G025900 TraesCS4A01G001100 TraesCS3B01G331000 TraesCS5A01G531600 TraesCS6D01G085200 TraesCS7A01G271700 TraesCS4B01G133100 …
61024	membrane organization	0.00033197	0.0077831	38/1525 2.4%	62/3886 1.5%	TraesCS1B01G254000 TraesCS1D01G242500 TraesCS7A01G549700 TraesCS7A01G490500 TraesCS6D01G143700 TraesCS3B01G283800 TraesCS7B01G473200 TraesCS5A01G297400 TraesCS3D01G083400 TraesCS5A01G545700 TraesCS5A01G132500 TraesCS7D01G476900 TraesCS3A01G082700 TraesCS6B01G181800 Triticum_aestivum_newGene_38162 TraesCS5A01G229500 TraesCS2A01G542800 TraesCS7B01G188800 TraesCSU01G129700 TraesCS7B01G186600 TraesCS…
16192	vesicle-mediated transport	0.00033366	0.0077831	36/1525 2.3%	58/3886 1.4%	TraesCS3B01G607200 TraesCS4A01G208500 TraesCS3A01G538700 TraesCS7A01G490500 TraesCS6D01G143700 TraesCS4D01G195500 TraesCS3B01G283800 TraesCS4D01G109600 TraesCS5A01G297400 TraesCS7D01G354500 TraesCS4A01G109400 Triticum_aestivum_newGene_52176 TraesCS3B01G106700 TraesCS5A01G132500 TraesCS7D01G476900 TraesCS6B01G181800 Triticum_aestivum_newGene_38162 TraesCS7B01G260100 TraesCS1D01G371000 TraesCS2A01G…
44255	cellular lipid metabolic process	0.00042167	0.0097301	64/1525 4.1%	117/3886 3.0%	TraesCS1D01G242500 TraesCS5B01G200600 TraesCS1A01G263600 TraesCS7B01G286200 TraesCS1B01G420700 TraesCS3D01G308100 TraesCS1A01G410200 TraesCS5D01G534500 TraesCS4B01G157800 TraesCS6D01G133200 TraesCS5A01G132500 TraesCS1D01G037900 TraesCS6B01G395700 TraesCS2A01G403000 TraesCS4D01G314400 TraesCS2B01G445300 TraesCS4B01G133100 TraesCS5B01G132400 TraesCS6A01G306700 TraesCS4A01G185600 TraesCS7B01G223000 …
55085	transmembrane transport	0.00048047	0.0107	88/1525 5.7%	170/3886 4.3%	TraesCS3D01G343500 TraesCS2B01G232400 TraesCS6B01G184800 TraesCS3A01G454400 TraesCS1B01G315900 TraesCS3A01G417100 TraesCS5D01G498200 TraesCS3A01G160700 TraesCS3B01G298700 TraesCS6A01G042900 TraesCS3B01G177000 TraesCS2B01G430000 TraesCS5A01G155300 TraesCS1A01G305200 TraesCS5A01G512200 TraesCS4B01G088500 TraesCS1A01G127500 TraesCS2A01G407000 TraesCS4D01G194800 Triticum_aestivum_newGene_41129 TraesC…
7186	G-protein coupled receptor protein signaling pathway	0.00048442	0.0107	12/1525 0.7%	14/3886 0.3%	TraesCS6A01G049900 TraesCS7B01G067700 TraesCS7D01G387000 TraesCS7B01G198600 Triticum_aestivum_newGene_16564 TraesCS7B01G293200 TraesCS3A01G315800 TraesCS3B01G351100 TraesCS6B01G428500 TraesCS3D01G315700 TraesCS7A01G297200 TraesCS7D01G291600
44247	cellular polysaccharide catabolic process	0.00048442	0.0107	12/1525 0.7%	14/3886 0.3%	TraesCS1A01G346200 Triticum_aestivum_newGene_42883 TraesCS3B01G276700 TraesCS3A01G248000 TraesCS5B01G146700 Triticum_aestivum_newGene_34595 Triticum_aestivum_newGene_57499 TraesCS1D01G348900 TraesCS3D01G248000 TraesCS2D01G166600 TraesCS5D01G144600 TraesCS1B01G359800
55082	cellular chemical homeostasis	0.00048865	0.0107	15/1525 0.9%	19/3886 0.4%	TraesCS4B01G078000 TraesCS1B01G315900 TraesCS1D01G304800 TraesCS4A01G237200 TraesCS6A01G049900 TraesCS4D01G076500 TraesCS4D01G025300 TraesCS3B01G199200 TraesCS4B01G027800 TraesCS1A01G305200 Triticum_aestivum_newGene_27654 TraesCS3A01G225100 TraesCS1D01G126500 Triticum_aestivum_newGene_72343 TraesCS4A01G286400
6873	cellular ion homeostasis	0.00048865	0.0107	15/1525 0.9%	19/3886 0.4%	TraesCS4B01G078000 TraesCS1B01G315900 TraesCS1D01G304800 TraesCS4A01G237200 TraesCS6A01G049900 TraesCS4D01G076500 TraesCS4D01G025300 TraesCS3B01G199200 TraesCS4B01G027800 TraesCS1A01G305200 Triticum_aestivum_newGene_27654 TraesCS3A01G225100 TraesCS1D01G126500 Triticum_aestivum_newGene_72343 TraesCS4A01G286400
44435	plastid part	0.00051331	0.011127	72/1525 4.7%	135/3886 3.4%	TraesCS2B01G553400 TraesCS1D01G242500 TraesCS5A01G524300 TraesCS3A01G024600 TraesCS5A01G173600 TraesCS3A01G417100 TraesCS5D01G498200 TraesCS7D01G452900 TraesCS2A01G218600 TraesCS7B01G231800 TraesCS2A01G500300 TraesCS5B01G171000 TraesCS5A01G155300 TraesCS1D01G037900 TraesCS5D01G178100 TraesCS4A01G286400 TraesCS1B01G359800 TraesCS2A01G517900 TraesCS7B01G354800 TraesCS7D01G443400 TraesCS3D01G206300 …
65007	biological regulation	0.00053822	0.011369	295/1525 19.3%	655/3886 16.8%	Triticum_aestivum_newGene_18157 TraesCS1B01G315900 TraesCS1D01G265100 TraesCS3B01G351100 TraesCS3B01G298700 TraesCS3A01G306000 TraesCS6D01G183300 TraesCS5D01G144600 TraesCS4A01G388100 TraesCS5B01G137600 TraesCS2B01G430000 TraesCS3D01G111100 TraesCS1B01G166800 TraesCS3D01G295900 TraesCS5D01G224600 TraesCS1B01G311300 TraesCS4D01G282700 TraesCS5A01G311500 TraesCS6D01G085200 TraesCS1D01G304800 TraesC…
22622	root system development	0.00054207	0.011369	33/1525 2.1%	53/3886 1.3%	TraesCS6D01G281900 Triticum_aestivum_newGene_64014 TraesCS6A01G202800 TraesCS1B01G420200 TraesCS2A01G327200 TraesCS6D01G183300 TraesCS6A01G097200 TraesCS3D01G270200 TraesCS6D01G133200 TraesCS1D01G400200 TraesCS6A01G196000 TraesCS4B01G233600 TraesCSU01G211800 TraesCS3B01G331000 TraesCS3D01G151400 TraesCS6D01G085200 Triticum_aestivum_newGene_12363 TraesCS1A01G392100 TraesCS6D01G188300 TraesCS3A01G2…
48364	root development	0.00054207	0.011369	33/1525 2.1%	53/3886 1.3%	TraesCS6D01G281900 Triticum_aestivum_newGene_64014 TraesCS6A01G202800 TraesCS1B01G420200 TraesCS2A01G327200 TraesCS6D01G183300 TraesCS6A01G097200 TraesCS3D01G270200 TraesCS6D01G133200 TraesCS1D01G400200 TraesCS6A01G196000 TraesCS4B01G233600 TraesCSU01G211800 TraesCS3B01G331000 TraesCS3D01G151400 TraesCS6D01G085200 Triticum_aestivum_newGene_12363 TraesCS1A01G392100 TraesCS6D01G188300 TraesCS3A01G2…
45177	apical part of cell	0.00055626	0.011369	8/1525 0.5%	8/3886 0.2%	TraesCS5D01G140700 TraesCS5A01G132500 TraesCS4D01G001000 TraesCS4B01G133100 TraesCS4B01G002300 TraesCS5B01G132400 TraesCS4A01G185600 TraesCS4A01G001100
30118	clathrin coat	0.00055626	0.011369	8/1525 0.5%	8/3886 0.2%	TraesCS1D01G371000 TraesCS7A01G490500 TraesCS6D01G143700 TraesCS7D01G476900 TraesCS6B01G181800 TraesCS7B01G393800 TraesCS5A01G297400 TraesCS5B01G296700
16324	apical plasma membrane	0.00055626	0.011369	8/1525 0.5%	8/3886 0.2%	TraesCS5D01G140700 TraesCS5A01G132500 TraesCS4D01G001000 TraesCS4B01G133100 TraesCS4B01G002300 TraesCS5B01G132400 TraesCS4A01G185600 TraesCS4A01G001100
4428	inositol or phosphatidylinositol kinase activity	0.00060338	0.011561	10/1525 0.6%	11/3886 0.2%	TraesCS4B01G152500 TraesCS4B01G157800 TraesCS5D01G140700 TraesCS5A01G132500 TraesCS4B01G133100 TraesCS5B01G132400 TraesCS4D01G128000 TraesCS4A01G143600 TraesCS4A01G185600 TraesCS4D01G161900
50306	sucrose 1F-fructosyltransferase activity	0.00060338	0.011561	10/1525 0.6%	11/3886 0.2%	TraesCS7A01G009800 TraesCS7D01G008700 TraesCS4A01G485400 TraesCS7D01G009400 TraesCS7A01G009100 TraesCS4A01G486000 TraesCS7A01G010200 TraesCS7A01G009200 TraesCS4A01G485900 TraesCS7D01G008800
50738	fructosyltransferase activity	0.00060338	0.011561	10/1525 0.6%	11/3886 0.2%	TraesCS7A01G009800 TraesCS7D01G008700 TraesCS4A01G485400 TraesCS7D01G009400 TraesCS7A01G009100 TraesCS4A01G486000 TraesCS7A01G010200 TraesCS7A01G009200 TraesCS4A01G485900 TraesCS7D01G008800
1727	lipid kinase activity	0.00060338	0.011561	10/1525 0.6%	11/3886 0.2%	TraesCS4B01G152500 TraesCS4B01G157800 TraesCS5D01G140700 TraesCS5A01G132500 TraesCS4B01G133100 TraesCS5B01G132400 TraesCS4D01G128000 TraesCS4A01G143600 TraesCS4A01G185600 TraesCS4D01G161900
71704	organic substance metabolic process	0.00060338	0.011561	10/1525 0.6%	11/3886 0.2%	Triticum_aestivum_newGene_18545 Triticum_aestivum_newGene_13165 TraesCS3B01G011200 Triticum_aestivum_newGene_38970 Triticum_aestivum_newGene_43200 TraesCS1D01G089100 TraesCS3B01G008500 TraesCS2D01G406900 TraesCS3D01G005000 Triticum_aestivum_newGene_13390
16307	phosphatidylinositol phosphate kinase activity	0.00060338	0.011561	10/1525 0.6%	11/3886 0.2%	TraesCS4B01G152500 TraesCS4B01G157800 TraesCS5D01G140700 TraesCS5A01G132500 TraesCS4B01G133100 TraesCS5B01G132400 TraesCS4D01G128000 TraesCS4A01G143600 TraesCS4A01G185600 TraesCS4D01G161900
16308	1-phosphatidylinositol-4-phosphate 5-kinase activity	0.00060338	0.011561	10/1525 0.6%	11/3886 0.2%	TraesCS4B01G152500 TraesCS4B01G157800 TraesCS5D01G140700 TraesCS5A01G132500 TraesCS4B01G133100 TraesCS5B01G132400 TraesCS4D01G128000 TraesCS4A01G143600 TraesCS4A01G185600 TraesCS4D01G161900
19725	cellular homeostasis	0.00071669	0.013611	23/1525 1.5%	34/3886 0.8%	TraesCS4B01G078000 TraesCS1B01G315900 TraesCS1D01G304800 TraesCS3B01G272600 TraesCS4A01G237200 TraesCS7B01G175300 TraesCS4A01G148500 TraesCS6A01G049900 TraesCS4D01G076500 TraesCS4D01G025300 TraesCS3B01G199200 TraesCS4B01G027800 TraesCS1A01G305200 TraesCS1A01G066400 Triticum_aestivum_newGene_27654 TraesCS3D01G244800 TraesCS3A01G225100 TraesCS1B01G311300 TraesCS1D01G126500 TraesCS1D01G067500 Tritic…
6972	hyperosmotic response	0.00073972	0.013925	13/1525 0.8%	16/3886 0.4%	TraesCS7D01G548200 TraesCS3D01G157800 TraesCS2A01G582800 TraesCS3A01G149900 TraesCS4A01G388100 TraesCS4A01G123100 TraesCS7B01G219600 TraesCS3B01G177000 TraesCS7A01G561600 TraesCS2D01G597300 TraesCS7B01G502200 TraesCS4B01G182900 TraesCS2B01G603700
9753	response to jasmonic acid stimulus	0.00076698	0.014313	17/1525 1.1%	23/3886 0.5%	TraesCS6B01G324300 TraesCS7D01G548200 TraesCS6D01G274700 TraesCS4A01G201200 TraesCS1A01G410100 TraesCS4D01G102200 TraesCS1A01G410200 TraesCS7B01G219600 TraesCS7A01G561600 TraesCS7B01G502200 TraesCS1D01G417500 TraesCS1D01G417400 TraesCS1B01G440100 TraesCS1B01G440000 TraesCS5B01G386800 TraesCS3A01G246700 TraesCS6A01G293800
51338	regulation of transferase activity	0.00089327	0.016525	18/1525 1.1%	25/3886 0.6%	TraesCS7D01G521000 TraesCS3D01G157700 Triticum_aestivum_newGene_16564 TraesCS7B01G293200 TraesCS3A01G315800 TraesCS3B01G351100 TraesCS3A01G149800 TraesCS3B01G183400 TraesCS7A01G533600 TraesCS5B01G199100 TraesCS7B01G450800 TraesCS7D01G387000 TraesCS7B01G198600 TraesCS6B01G428500 TraesCS3D01G315700 TraesCS7A01G297200 TraesCS7D01G291600 TraesCS3D01G408000
16021	integral to membrane	0.00097275	0.017842	210/1525 13.7%	456/3886 11.7%	TraesCS3D01G343500 TraesCS3D01G070700 Triticum_aestivum_newGene_36023 TraesCS2B01G232400 TraesCS4B01G356000 TraesCS4D01G195500 TraesCS2B01G144900 TraesCS5D01G444900 TraesCS2B01G430000 TraesCS5A01G155300 Triticum_aestivum_newGene_22543 TraesCS5D01G300800 TraesCS4D01G314400 TraesCS5D01G015200 TraesCS6A01G306700 Triticum_aestivum_newGene_12748 TraesCS6A01G154900 TraesCS1B01G056700 TraesCS5A01G484700…
10646	regulation of cell communication	0.00099884	0.018165	14/1525 0.9%	18/3886 0.4%	TraesCS7D01G521000 TraesCS3B01G548000 TraesCS3D01G157700 TraesCS1B01G251400 TraesCS2A01G219400 TraesCS3A01G149800 TraesCS2D01G225300 TraesCS7B01G277700 TraesCS3B01G433600 TraesCS7A01G533600 TraesCS7B01G450800 TraesCS7B01G067700 TraesCS2B01G245000 TraesCS4D01G282700
43412	macromolecule modification	0.0010347	0.018463	235/1525 15.4%	516/3886 13.2%	TraesCS2B01G553400 TraesCS3B01G355700 TraesCS7D01G050100 TraesCS4A01G145600 TraesCS3A01G326400 TraesCS1D01G187400 TraesCS3A01G306000 TraesCS5D01G144600 TraesCS7A01G155200 TraesCS4A01G388100 TraesCS5B01G137600 TraesCS1B01G355800 TraesCS6A01G182800 TraesCS3D01G295900 TraesCS7A01G168400 TraesCS4D01G282700 TraesCS2A01G403000 TraesCS7D01G357700 TraesCS2B01G474600 TraesCS6A01G154900 TraesCS3B01G259100 …
44434	chloroplast part	0.0010514	0.018463	69/1525 4.5%	131/3886 3.3%	TraesCS2B01G553400 TraesCS1D01G242500 TraesCS5A01G524300 TraesCS3A01G024600 TraesCS3A01G417100 TraesCS5D01G498200 TraesCS7D01G452900 TraesCS2A01G218600 TraesCS7B01G231800 TraesCS2A01G500300 TraesCS5A01G155300 TraesCS1D01G037900 TraesCS4A01G286400 TraesCS1B01G359800 TraesCS2A01G517900 TraesCS7B01G354800 TraesCS7D01G443400 TraesCS3D01G206300 TraesCS3B01G276700 TraesCS2B01G445300 TraesCS3D01G266400 …
9966	regulation of signal transduction	0.0010709	0.018463	11/1525 0.7%	13/3886 0.3%	TraesCS2D01G225300 TraesCS7D01G521000 TraesCS3B01G548000 TraesCS3B01G433600 TraesCS7A01G533600 TraesCS3D01G157700 TraesCS7B01G450800 TraesCS1B01G251400 TraesCS2B01G245000 TraesCS2A01G219400 TraesCS3A01G149800
51347	positive regulation of transferase activity	0.0010709	0.018463	11/1525 0.7%	13/3886 0.3%	TraesCS7D01G387000 TraesCS7B01G198600 Triticum_aestivum_newGene_16564 TraesCS7B01G293200 TraesCS3A01G315800 TraesCS3B01G351100 TraesCS6B01G428500 TraesCS3D01G315700 TraesCS7A01G297200 TraesCS7D01G291600 TraesCS3D01G408000
23051	regulation of signaling process	0.0010709	0.018463	11/1525 0.7%	13/3886 0.3%	TraesCS2D01G225300 TraesCS7D01G521000 TraesCS3B01G548000 TraesCS3B01G433600 TraesCS7A01G533600 TraesCS3D01G157700 TraesCS7B01G450800 TraesCS1B01G251400 TraesCS2B01G245000 TraesCS2A01G219400 TraesCS3A01G149800
6944	cellular membrane fusion	0.0010709	0.018463	11/1525 0.7%	13/3886 0.3%	TraesCS7A01G549700 TraesCS3D01G252800 TraesCS7D01G536300 TraesCS7B01G188800 TraesCS3B01G283800 TraesCS7B01G186600 TraesCS7B01G210400 TraesCS3A01G252300 TraesCS7B01G473200 TraesCS7D01G307100 TraesCS7A01G310600
6812	cation transport	0.0010754	0.018463	42/1525 2.7%	73/3886 1.8%	TraesCS2D01G180500 TraesCS3B01G416000 TraesCS6B01G184800 TraesCS2D01G342500 TraesCS5D01G081200 TraesCS1A01G410100 TraesCS3B01G298700 TraesCS1A01G410200 TraesCS3A01G383600 TraesCS1D01G418100 TraesCS4B01G027800 TraesCS5D01G346300 TraesCS6B01G258700 TraesCS5A01G512200 TraesCS3B01G322900 TraesCS5D01G212700 Triticum_aestivum_newGene_72343 TraesCS3B01G213600 TraesCS3D01G444600 TraesCS4B01G233300 TraesC…
30029	actin filament-based process	0.0011065	0.018846	20/1525 1.3%	29/3886 0.7%	TraesCS6A01G247000 TraesCS7A01G549700 TraesCS6D01G189200 TraesCS7D01G272000 TraesCS6A01G200700 TraesCS6D01G229200 TraesCS7A01G271700 TraesCS7B01G186600 TraesCS7B01G473200 TraesCS5D01G089100 TraesCS2B01G255200 TraesCS1A01G173600 TraesCS1B01G190800 TraesCS2A01G227300 TraesCS1D01G165200 TraesCS7D01G536300 TraesCS6B01G277600 TraesCS7B01G170300 TraesCS6B01G226800 TraesCS2D01G235200
9570	chloroplast stroma	0.0013813	0.020336	45/1525 2.9%	80/3886 2.0%	TraesCS1A01G213000 TraesCS1B01G254000 TraesCS1D01G242500 TraesCS7A01G465200 TraesCS5A01G524300 TraesCS3A01G024600 TraesCS1B01G046200 TraesCS7D01G452900 TraesCS2A01G218600 TraesCS3D01G083400 TraesCS7B01G231800 TraesCS5A01G111500 Triticum_aestivum_newGene_27892 TraesCS1D01G037900 TraesCS3A01G082700 TraesCS1D01G215900 TraesCS3B01G020200 TraesCS1B01G359800 TraesCS5A01G229500 TraesCS2A01G517900 TraesC…
9073	aromatic amino acid family biosynthetic process	0.0014102	0.020336	9/1525 0.5%	10/3886 0.2%	TraesCS5A01G229500 TraesCS1B01G254000 TraesCS1D01G242500 TraesCS5A01G545700 TraesCS7B01G067700 TraesCS3A01G082700 TraesCSU01G129700 TraesCS3D01G083400 TraesCS3B01G097800
46417	chorismate metabolic process	0.0014102	0.020336	9/1525 0.5%	10/3886 0.2%	TraesCS5A01G229500 TraesCS1B01G254000 TraesCS1D01G242500 TraesCS5A01G545700 TraesCS7B01G067700 TraesCS3A01G082700 TraesCSU01G129700 TraesCS3D01G083400 TraesCS3B01G097800
9827	plant-type cell wall modification	0.0014102	0.020336	9/1525 0.5%	10/3886 0.2%	TraesCS6D01G281900 TraesCS5D01G140700 TraesCS5A01G132500 TraesCS6A01G302400 TraesCS1D01G144300 TraesCS4B01G133100 TraesCS5B01G132400 TraesCS6B01G331600 TraesCS4A01G185600
5983	starch catabolic process	0.0014102	0.020336	9/1525 0.5%	10/3886 0.2%	TraesCS1A01G346200 TraesCS3B01G276700 TraesCS3A01G248000 TraesCS5B01G146700 TraesCS1D01G348900 TraesCS3D01G248000 TraesCS2D01G166600 TraesCS5D01G144600 TraesCS1B01G359800
31406	carboxylic acid binding	0.0014102	0.020336	9/1525 0.5%	10/3886 0.2%	TraesCS4A01G254300 Triticum_aestivum_newGene_27892 TraesCS1D01G037900 TraesCS4D01G059900 TraesCS1B01G046200 TraesCS2D01G091700 TraesCS7A01G051100 TraesCS4B01G060200 TraesCS2B01G107400
30001	metal ion transport	0.0014162	0.020336	31/1525 2.0%	51/3886 1.3%	TraesCS2D01G180500 TraesCS3B01G416000 TraesCS6B01G184800 TraesCS2D01G342500 TraesCS1A01G410100 TraesCS3B01G298700 TraesCS1A01G410200 TraesCS3A01G383600 TraesCS4B01G027800 TraesCS6B01G258700 TraesCS3B01G322900 TraesCS5D01G212700 Triticum_aestivum_newGene_72343 TraesCS3B01G213600 TraesCS3D01G444600 TraesCS4A01G286400 TraesCSU01G177700 TraesCS7B01G210400 TraesCS7A01G261100 TraesCS5D01G235100 TraesCS…
31967	organelle envelope	0.0014162	0.020336	58/1525 3.8%	108/3886 2.7%	TraesCS1D01G242500 TraesCS3A01G024600 TraesCS5A01G173600 TraesCS3A01G417100 TraesCS5D01G498200 TraesCS2D01G566900 TraesCS3B01G177000 TraesCS7B01G231800 TraesCS5B01G171000 TraesCS5A01G155300 TraesCS5D01G178100 TraesCS4D01G194800 TraesCS4A01G286400 TraesCS1B01G359800 TraesCS4B01G193900 TraesCS2A01G517900 TraesCS3D01G157800 TraesCS2B01G445300 TraesCS5B01G300300 TraesCS5B01G153600 TraesCS7B01G197000 …
31975	envelope	0.0014162	0.020336	58/1525 3.8%	108/3886 2.7%	TraesCS1D01G242500 TraesCS3A01G024600 TraesCS5A01G173600 TraesCS3A01G417100 TraesCS5D01G498200 TraesCS2D01G566900 TraesCS3B01G177000 TraesCS7B01G231800 TraesCS5B01G171000 TraesCS5A01G155300 TraesCS5D01G178100 TraesCS4D01G194800 TraesCS4A01G286400 TraesCS1B01G359800 TraesCS4B01G193900 TraesCS2A01G517900 TraesCS3D01G157800 TraesCS2B01G445300 TraesCS5B01G300300 TraesCS5B01G153600 TraesCS7B01G197000 …
4725	protein tyrosine phosphatase activity	0.0014214	0.020336	7/1525 0.4%	7/3886 0.1%	TraesCS7D01G521000 TraesCS7B01G073200 TraesCS7A01G533600 TraesCS7B01G450800 Triticum_aestivum_newGene_43213 TraesCS7D01G169300 TraesCS7A01G168400
9527	plastid outer membrane	0.0014214	0.020336	7/1525 0.4%	7/3886 0.1%	TraesCS5B01G171000 TraesCS5A01G173600 TraesCS6B01G404700 TraesCS2B01G445300 TraesCS5D01G178100 TraesCS6A01G368700 TraesCS6D01G352200
5545	phosphatidylinositol binding	0.0014214	0.020336	7/1525 0.4%	7/3886 0.1%	TraesCS7A01G490500 TraesCS6D01G143700 TraesCS7D01G476900 TraesCS6B01G181800 TraesCS7B01G393800 TraesCS5A01G297400 TraesCS5B01G296700
51345	positive regulation of hydrolase activity	0.0014214	0.020336	7/1525 0.4%	7/3886 0.1%	TraesCS2D01G225300 TraesCS7B01G067700 Triticum_aestivum_newGene_27700 Triticum_aestivum_newGene_28357 TraesCS2B01G245000 TraesCS2A01G219400 Triticum_aestivum_newGene_27701
80092	regulation of pollen tube growth	0.0014214	0.020336	7/1525 0.4%	7/3886 0.1%	TraesCS4B01G130300 TraesCS7D01G162700 TraesCS7B01G066500 TraesCS5A01G138300 TraesCS5D01G153800 TraesCS7A01G161400 TraesCS5B01G137600
35335	peptidyl-tyrosine dephosphorylation	0.0014214	0.020336	7/1525 0.4%	7/3886 0.1%	TraesCS7D01G521000 TraesCS7B01G073200 TraesCS7A01G533600 TraesCS7B01G450800 Triticum_aestivum_newGene_43213 TraesCS7D01G169300 TraesCS7A01G168400
10769	regulation of cell morphogenesis involved in differentiation	0.0014214	0.020336	7/1525 0.4%	7/3886 0.1%	TraesCS4B01G130300 TraesCS7D01G162700 TraesCS7B01G066500 TraesCS5A01G138300 TraesCS5D01G153800 TraesCS7A01G161400 TraesCS5B01G137600
6879	cellular iron ion homeostasis	0.0014214	0.020336	7/1525 0.4%	7/3886 0.1%	TraesCS4B01G078000 TraesCS4D01G076500 TraesCS1B01G315900 TraesCS1D01G304800 TraesCS1A01G305200 TraesCS4A01G237200 Triticum_aestivum_newGene_72343
6900	membrane budding	0.0014214	0.020336	7/1525 0.4%	7/3886 0.1%	TraesCS7A01G490500 TraesCS6D01G143700 TraesCS7D01G476900 TraesCS6B01G181800 TraesCS7B01G393800 TraesCS5A01G297400 TraesCS5B01G296700
6901	vesicle coating	0.0014214	0.020336	7/1525 0.4%	7/3886 0.1%	TraesCS7A01G490500 TraesCS6D01G143700 TraesCS7D01G476900 TraesCS6B01G181800 TraesCS7B01G393800 TraesCS5A01G297400 TraesCS5B01G296700
60284	regulation of cell development	0.0014214	0.020336	7/1525 0.4%	7/3886 0.1%	TraesCS4B01G130300 TraesCS7D01G162700 TraesCS7B01G066500 TraesCS5A01G138300 TraesCS5D01G153800 TraesCS7A01G161400 TraesCS5B01G137600
48268	clathrin coat assembly	0.0014214	0.020336	7/1525 0.4%	7/3886 0.1%	TraesCS7A01G490500 TraesCS6D01G143700 TraesCS7D01G476900 TraesCS6B01G181800 TraesCS7B01G393800 TraesCS5A01G297400 TraesCS5B01G296700
48511	rhythmic process	0.0014214	0.020336	7/1525 0.4%	7/3886 0.1%	TraesCS1A01G346200 TraesCS3B01G276700 TraesCS3A01G248000 TraesCS1D01G348900 TraesCS3D01G248000 TraesCS3D01G408000 TraesCS1B01G359800
7623	circadian rhythm	0.0014214	0.020336	7/1525 0.4%	7/3886 0.1%	TraesCS1A01G346200 TraesCS3B01G276700 TraesCS3A01G248000 TraesCS1D01G348900 TraesCS3D01G248000 TraesCS3D01G408000 TraesCS1B01G359800
16050	vesicle organization	0.0014214	0.020336	7/1525 0.4%	7/3886 0.1%	TraesCS7A01G490500 TraesCS6D01G143700 TraesCS7D01G476900 TraesCS6B01G181800 TraesCS7B01G393800 TraesCS5A01G297400 TraesCS5B01G296700
31163	metallo-sulfur cluster assembly	0.0015546	0.021804	12/1525 0.7%	15/3886 0.3%	TraesCS5A01G229500 TraesCS1B01G254000 TraesCS1D01G242500 TraesCS5A01G111500 TraesCS5A01G545700 TraesCS3A01G082700 Triticum_aestivum_newGene_1088 TraesCSU01G129700 TraesCS3D01G083400 TraesCS3B01G097800 TraesCS5D01G128400 TraesCS5B01G119500
35466	regulation of signaling pathway	0.0015546	0.021804	12/1525 0.7%	15/3886 0.3%	TraesCS2D01G225300 TraesCS7D01G521000 TraesCS3B01G548000 TraesCS7A01G533600 TraesCS3D01G157700 TraesCS7B01G450800 TraesCS7B01G067700 TraesCS1B01G251400 TraesCS2B01G245000 TraesCS2A01G219400 TraesCS3A01G149800 TraesCS4D01G282700
16226	iron-sulfur cluster assembly	0.0015546	0.021804	12/1525 0.7%	15/3886 0.3%	TraesCS5A01G229500 TraesCS1B01G254000 TraesCS1D01G242500 TraesCS5A01G111500 TraesCS5A01G545700 TraesCS3A01G082700 Triticum_aestivum_newGene_1088 TraesCSU01G129700 TraesCS3D01G083400 TraesCS3B01G097800 TraesCS5D01G128400 TraesCS5B01G119500
45859	regulation of protein kinase activity	0.0016723	0.023005	17/1525 1.1%	24/3886 0.6%	TraesCS7D01G521000 TraesCS3D01G157700 Triticum_aestivum_newGene_16564 TraesCS7B01G293200 TraesCS3A01G315800 TraesCS3B01G351100 TraesCS3A01G149800 TraesCS3B01G183400 TraesCS7A01G533600 TraesCS5B01G199100 TraesCS7B01G450800 TraesCS7D01G387000 TraesCS7B01G198600 TraesCS6B01G428500 TraesCS3D01G315700 TraesCS7A01G297200 TraesCS7D01G291600
42325	regulation of phosphorylation	0.0016723	0.023005	17/1525 1.1%	24/3886 0.6%	TraesCS7D01G521000 TraesCS3D01G157700 Triticum_aestivum_newGene_16564 TraesCS7B01G293200 TraesCS3A01G315800 TraesCS3B01G351100 TraesCS3A01G149800 TraesCS3B01G183400 TraesCS7A01G533600 TraesCS5B01G199100 TraesCS7B01G450800 TraesCS7D01G387000 TraesCS7B01G198600 TraesCS6B01G428500 TraesCS3D01G315700 TraesCS7A01G297200 TraesCS7D01G291600
43549	regulation of kinase activity	0.0016723	0.023005	17/1525 1.1%	24/3886 0.6%	TraesCS7D01G521000 TraesCS3D01G157700 Triticum_aestivum_newGene_16564 TraesCS7B01G293200 TraesCS3A01G315800 TraesCS3B01G351100 TraesCS3A01G149800 TraesCS3B01G183400 TraesCS7A01G533600 TraesCS5B01G199100 TraesCS7B01G450800 TraesCS7D01G387000 TraesCS7B01G198600 TraesCS6B01G428500 TraesCS3D01G315700 TraesCS7A01G297200 TraesCS7D01G291600
16788	hydrolase activity, acting on ester bonds	0.0017529	0.02396	90/1525 5.9%	180/3886 4.6%	TraesCS5B01G200600 TraesCS4A01G365300 TraesCS4D01G128500 TraesCS2A01G130200 TraesCS5B01G078500 TraesCS1A01G095500 TraesCS5D01G089100 TraesCS6D01G388000 TraesCS5D01G144600 TraesCS7D01G263700 TraesCS5A01G216500 Triticum_aestivum_newGene_56517 TraesCS7A01G533600 TraesCS5D01G224600 TraesCS4D01G189100 TraesCSU01G038600 TraesCS7A01G168400 TraesCS4D01G282700 TraesCS2A01G403000 TraesCS5A01G327600 TraesCS…
6811	ion transport	0.001891	0.025684	58/1525 3.8%	109/3886 2.8%	TraesCS2D01G180500 TraesCS6B01G184800 TraesCS1B01G315900 TraesCS3B01G298700 TraesCS1A01G410200 TraesCS3A01G383600 TraesCS6A01G049900 TraesCS4D01G076500 TraesCS1A01G305200 TraesCS5A01G512200 TraesCS4D01G194800 TraesCS3B01G322900 TraesCS5D01G212700 TraesCS3D01G444600 TraesCS4A01G286400 TraesCS4B01G078000 TraesCS4B01G193900 TraesCS3A01G340500 Triticum_aestivum_newGene_40951 TraesCS1D01G304800 Tritic…
4722	protein serine/threonine phosphatase activity	0.002014	0.027182	13/1525 0.8%	17/3886 0.4%	TraesCS7D01G417600 TraesCS6A01G202800 TraesCS3D01G206300 Triticum_aestivum_newGene_61894 TraesCS5B01G078500 TraesCS6D01G188300 TraesCS4D01G087200 TraesCS7B01G326200 Triticum_aestivum_newGene_56517 TraesCS7A01G423900 Triticum_aestivum_newGene_23789 TraesCS4D01G282700 TraesCS6B01G224900
6633	fatty acid biosynthetic process	0.0021958	0.029451	21/1525 1.3%	32/3886 0.8%	TraesCS1A01G213000 TraesCS4D01G314400 TraesCS7D01G548200 TraesCS1A01G410100 TraesCS1A01G410200 TraesCS3D01G083400 TraesCS3B01G097800 TraesCS4B01G076000 TraesCS4B01G318000 TraesCS7A01G561600 TraesCS7B01G502200 TraesCS1D01G417500 TraesCS1D01G417400 TraesCS3A01G082700 TraesCS1B01G440100 TraesCS6B01G395700 TraesCS1B01G226500 TraesCS1B01G440000 TraesCS1D01G215900 TraesCS7D01G089200 TraesCS1D01G420900
5739	mitochondrion	0.002248	0.029533	235/1525 15.4%	522/3886 13.4%	Triticum_aestivum_newGene_41973 TraesCS3A01G024600 TraesCS2A01G130200 TraesCS3B01G351100 TraesCS6D01G183300 TraesCS2B01G430000 TraesCS1D01G148600 TraesCS1B01G311300 TraesCS3B01G322900 TraesCS4D01G282700 TraesCS4D01G314400 TraesCS2A01G494500 TraesCS7B01G197000 TraesCS2D01G494800 TraesCS7D01G475200 TraesCS1D01G256500 TraesCS2B01G152300 TraesCS2B01G556000 TraesCS3D01G315700 TraesCS3B01G342400 TraesC…
15297	antiporter activity	0.0023123	0.029533	23/1525 1.5%	36/3886 0.9%	TraesCS7D01G460200 TraesCS3A01G340500 TraesCS3D01G157800 TraesCS1B01G315900 TraesCS1D01G304800 TraesCS5D01G081200 TraesCS3A01G149900 TraesCS3B01G298700 TraesCS3B01G177000 TraesCS1D01G418100 TraesCS5B01G149200 TraesCS3A01G265100 TraesCS1B01G440400 TraesCS1A01G120600 TraesCS5D01G346300 TraesCS1A01G305200 TraesCS7A01G473200 TraesCS5A01G512200 Triticum_aestivum_newGene_72355 Triticum_aestivum_newGene…
31090	organelle membrane	0.0023321	0.029533	54/1525 3.5%	101/3886 2.5%	TraesCS5A01G173600 TraesCS2B01G144900 TraesCS5D01G534500 TraesCS3B01G177000 TraesCS5B01G171000 TraesCS4D01G076500 TraesCS7B01G067700 TraesCS7B01G342700 TraesCS6D01G269600 TraesCS5D01G178100 TraesCS5A01G405700 TraesCS4D01G194800 Triticum_aestivum_newGene_58532 TraesCS5D01G415700 Triticum_aestivum_newGene_5083 TraesCS5D01G153400 TraesCS4A01G286400 TraesCS4B01G078000 TraesCS4B01G193900 TraesCS3D01G1…
4143	diacylglycerol kinase activity	0.0023395	0.029533	10/1525 0.6%	12/3886 0.3%	TraesCS7D01G387000 TraesCS7B01G198600 Triticum_aestivum_newGene_16564 TraesCS7B01G293200 TraesCS3A01G315800 TraesCS3B01G351100 TraesCS6B01G428500 TraesCS3D01G315700 TraesCS7A01G297200 TraesCS7D01G291600
45860	positive regulation of protein kinase activity	0.0023395	0.029533	10/1525 0.6%	12/3886 0.3%	TraesCS7D01G387000 TraesCS7B01G198600 Triticum_aestivum_newGene_16564 TraesCS7B01G293200 TraesCS3A01G315800 TraesCS3B01G351100 TraesCS6B01G428500 TraesCS3D01G315700 TraesCS7A01G297200 TraesCS7D01G291600
33674	positive regulation of kinase activity	0.0023395	0.029533	10/1525 0.6%	12/3886 0.3%	TraesCS7D01G387000 TraesCS7B01G198600 Triticum_aestivum_newGene_16564 TraesCS7B01G293200 TraesCS3A01G315800 TraesCS3B01G351100 TraesCS6B01G428500 TraesCS3D01G315700 TraesCS7A01G297200 TraesCS7D01G291600
9894	regulation of catabolic process	0.0023395	0.029533	10/1525 0.6%	12/3886 0.3%	TraesCS2D01G225300 Triticum_aestivum_newGene_10616 TraesCS3B01G548000 Triticum_aestivum_newGene_27700 Triticum_aestivum_newGene_11362 Triticum_aestivum_newGene_28357 TraesCS1B01G251400 TraesCS2B01G245000 TraesCS2A01G219400 Triticum_aestivum_newGene_27701
31329	regulation of cellular catabolic process	0.0023395	0.029533	10/1525 0.6%	12/3886 0.3%	TraesCS2D01G225300 Triticum_aestivum_newGene_10616 TraesCS3B01G548000 Triticum_aestivum_newGene_27700 Triticum_aestivum_newGene_11362 Triticum_aestivum_newGene_28357 TraesCS1B01G251400 TraesCS2B01G245000 TraesCS2A01G219400 Triticum_aestivum_newGene_27701
7205	activation of protein kinase C activity by G-protein coupled receptor protein signaling pathway	0.0023395	0.029533	10/1525 0.6%	12/3886 0.3%	TraesCS7D01G387000 TraesCS7B01G198600 Triticum_aestivum_newGene_16564 TraesCS7B01G293200 TraesCS3A01G315800 TraesCS3B01G351100 TraesCS6B01G428500 TraesCS3D01G315700 TraesCS7A01G297200 TraesCS7D01G291600
32147	activation of protein kinase activity	0.0023395	0.029533	10/1525 0.6%	12/3886 0.3%	TraesCS7D01G387000 TraesCS7B01G198600 Triticum_aestivum_newGene_16564 TraesCS7B01G293200 TraesCS3A01G315800 TraesCS3B01G351100 TraesCS6B01G428500 TraesCS3D01G315700 TraesCS7A01G297200 TraesCS7D01G291600
9532	plastid stroma	0.0027016	0.033904	45/1525 2.9%	82/3886 2.1%	TraesCS1A01G213000 TraesCS1B01G254000 TraesCS1D01G242500 TraesCS7A01G465200 TraesCS5A01G524300 TraesCS3A01G024600 TraesCS1B01G046200 TraesCS7D01G452900 TraesCS2A01G218600 TraesCS3D01G083400 TraesCS7B01G231800 TraesCS5A01G111500 Triticum_aestivum_newGene_27892 TraesCS1D01G037900 TraesCS3A01G082700 TraesCS1D01G215900 TraesCS3B01G020200 TraesCS1B01G359800 TraesCS5A01G229500 TraesCS2A01G517900 TraesC…
3779	actin binding	0.0027851	0.034748	15/1525 0.9%	21/3886 0.5%	TraesCS6A01G247000 Triticum_aestivum_newGene_13165 TraesCS6D01G189200 Triticum_aestivum_newGene_38970 TraesCS6A01G200700 TraesCS6D01G229200 TraesCS2B01G255200 TraesCS1A01G173600 TraesCS1B01G190800 TraesCS2A01G227300 TraesCS1D01G165200 TraesCS6B01G277600 Triticum_aestivum_newGene_59103 TraesCS6B01G226800 TraesCS2D01G235200
16758	transferase activity, transferring hexosyl groups	0.0028328	0.035139	44/1525 2.8%	80/3886 2.0%	TraesCS7D01G008700 TraesCS2D01G025100 TraesCS5B01G305300 Triticum_aestivum_newGene_48425 TraesCS2B01G144900 TraesCS7D01G008800 TraesCS6A01G116400 TraesCS7D01G171900 TraesCS3A01G366400 TraesCS7B01G119500 TraesCS7A01G344300 TraesCS4A01G485400 Triticum_aestivum_newGene_2592 TraesCS6A01G368700 TraesCS2D01G166600 TraesCS1D01G349800 Triticum_aestivum_newGene_5083 TraesCS6B01G110400 TraesCS7A01G009800 T…
15674	di-, tri-valent inorganic cation transport	0.0030846	0.037602	16/1525 1.0%	23/3886 0.5%	TraesCS3B01G416000 TraesCSU01G177700 TraesCS1A01G410100 TraesCS3B01G298700 TraesCS1A01G410200 TraesCS3A01G383600 TraesCS1D01G417500 TraesCS4D01G025300 TraesCS3A01G265100 TraesCS1D01G417400 TraesCS4B01G027800 TraesCS1B01G440100 TraesCS1B01G440000 Triticum_aestivum_newGene_72343 TraesCS3D01G376700 TraesCS4A01G286400
30003	cellular cation homeostasis	0.0032213	0.037602	11/1525 0.7%	14/3886 0.3%	TraesCS4B01G078000 TraesCS6A01G049900 TraesCS4D01G076500 TraesCS4D01G025300 TraesCS4B01G027800 TraesCS1B01G315900 TraesCS1D01G304800 TraesCS1A01G305200 TraesCS4A01G237200 Triticum_aestivum_newGene_72343 TraesCS4A01G286400
23014	signal transmission via phosphorylation event	0.0032213	0.037602	11/1525 0.7%	14/3886 0.3%	TraesCS3A01G340000 TraesCS7D01G521000 TraesCS7A01G533600 TraesCS3A01G228000 TraesCS3D01G157700 TraesCS7B01G450800 TraesCS3B01G256700 Triticum_aestivum_newGene_6244 TraesCS3B01G260900 TraesCS3A01G149800 TraesCS3D01G221700
6839	mitochondrial transport	0.0032213	0.037602	11/1525 0.7%	14/3886 0.3%	TraesCS3B01G177000 TraesCS4B01G193900 TraesCS5D01G307000 TraesCS5B01G243600 TraesCS3D01G157800 TraesCS5A01G246300 TraesCS5D01G252800 TraesCS4D01G194800 TraesCS3A01G149900 TraesCS5B01G300300 TraesCS4A01G407600
33121	regulation of purine nucleotide catabolic process	0.0032656	0.037602	8/1525 0.5%	9/3886 0.2%	TraesCS2D01G225300 TraesCS3B01G548000 Triticum_aestivum_newGene_27700 Triticum_aestivum_newGene_28357 TraesCS1B01G251400 TraesCS2B01G245000 TraesCS2A01G219400 Triticum_aestivum_newGene_27701
33124	regulation of GTP catabolic process	0.0032656	0.037602	8/1525 0.5%	9/3886 0.2%	TraesCS2D01G225300 TraesCS3B01G548000 Triticum_aestivum_newGene_27700 Triticum_aestivum_newGene_28357 TraesCS1B01G251400 TraesCS2B01G245000 TraesCS2A01G219400 Triticum_aestivum_newGene_27701
30117	membrane coat	0.0032656	0.037602	8/1525 0.5%	9/3886 0.2%	TraesCS1D01G371000 TraesCS7A01G490500 TraesCS6D01G143700 TraesCS7D01G476900 TraesCS6B01G181800 TraesCS7B01G393800 TraesCS5A01G297400 TraesCS5B01G296700
6140	regulation of nucleotide metabolic process	0.0032656	0.037602	8/1525 0.5%	9/3886 0.2%	TraesCS2D01G225300 TraesCS3B01G548000 Triticum_aestivum_newGene_27700 Triticum_aestivum_newGene_28357 TraesCS1B01G251400 TraesCS2B01G245000 TraesCS2A01G219400 Triticum_aestivum_newGene_27701
43087	regulation of GTPase activity	0.0032656	0.037602	8/1525 0.5%	9/3886 0.2%	TraesCS2D01G225300 TraesCS3B01G548000 Triticum_aestivum_newGene_27700 Triticum_aestivum_newGene_28357 TraesCS1B01G251400 TraesCS2B01G245000 TraesCS2A01G219400 Triticum_aestivum_newGene_27701
30811	regulation of nucleotide catabolic process	0.0032656	0.037602	8/1525 0.5%	9/3886 0.2%	TraesCS2D01G225300 TraesCS3B01G548000 Triticum_aestivum_newGene_27700 Triticum_aestivum_newGene_28357 TraesCS1B01G251400 TraesCS2B01G245000 TraesCS2A01G219400 Triticum_aestivum_newGene_27701
48475	coated membrane	0.0032656	0.037602	8/1525 0.5%	9/3886 0.2%	TraesCS1D01G371000 TraesCS7A01G490500 TraesCS6D01G143700 TraesCS7D01G476900 TraesCS6B01G181800 TraesCS7B01G393800 TraesCS5A01G297400 TraesCS5B01G296700
9653	anatomical structure morphogenesis	0.0034681	0.037602	66/1525 4.3%	129/3886 3.3%	TraesCS7A01G224500 TraesCS6D01G189200 TraesCS2A01G327200 TraesCS7D01G226000 TraesCS6D01G183300 TraesCS2A01G321100 TraesCS3D01G270200 TraesCS3A01G157100 TraesCS5A01G132500 TraesCS1B01G166800 TraesCS5D01G484400 TraesCS1D01G400200 TraesCS4A01G001100 TraesCS3B01G331000 TraesCS6D01G085200 TraesCS5B01G484400 TraesCS7A01G271700 TraesCS4B01G133100 TraesCS5B01G132400 TraesCS2D01G043600 TraesCS4A01G185600 …
45271	respiratory chain complex I	0.0036308	0.037602	6/1525 0.3%	6/3886 0.1%	TraesCS5B01G171000 TraesCS1D01G357100 TraesCS5A01G173600 TraesCS1A01G066400 TraesCS5D01G178100 TraesCS1D01G067500
32984	macromolecular complex disassembly	0.0036308	0.037602	6/1525 0.3%	6/3886 0.1%	TraesCS6A01G247000 TraesCS2A01G227300 TraesCS6B01G277600 TraesCS6D01G229200 TraesCS2B01G255200 TraesCS2D01G235200
4611	phosphoenolpyruvate carboxykinase activity	0.0036308	0.037602	6/1525 0.3%	6/3886 0.1%	Triticum_aestivum_newGene_13165 TraesCS3B01G011200 Triticum_aestivum_newGene_38970 Triticum_aestivum_newGene_43200 TraesCS3B01G008500 TraesCS3D01G005000
8964	phosphoenolpyruvate carboxylase activity	0.0036308	0.037602	6/1525 0.3%	6/3886 0.1%	Triticum_aestivum_newGene_13165 TraesCS3B01G011200 Triticum_aestivum_newGene_38970 Triticum_aestivum_newGene_43200 TraesCS3B01G008500 TraesCS3D01G005000
9247	glycolipid biosynthetic process	0.0036308	0.037602	6/1525 0.3%	6/3886 0.1%	TraesCS3A01G055500 TraesCS6B01G404700 TraesCS3D01G308100 TraesCS3B01G342400 TraesCS6A01G368700 TraesCS6D01G352200
30042	actin filament depolymerization	0.0036308	0.037602	6/1525 0.3%	6/3886 0.1%	TraesCS6A01G247000 TraesCS2A01G227300 TraesCS6B01G277600 TraesCS6D01G229200 TraesCS2B01G255200 TraesCS2D01G235200
46467	membrane lipid biosynthetic process	0.0036308	0.037602	6/1525 0.3%	6/3886 0.1%	TraesCS3A01G055500 TraesCS6B01G404700 TraesCS3D01G308100 TraesCS3B01G342400 TraesCS6A01G368700 TraesCS6D01G352200
9646	response to absence of light	0.0036308	0.037602	6/1525 0.3%	6/3886 0.1%	TraesCS1D01G417500 TraesCS1D01G417400 TraesCS1B01G440100 TraesCS1B01G440000 TraesCS1A01G410100 TraesCS1A01G410200
5747	mitochondrial respiratory chain complex I	0.0036308	0.037602	6/1525 0.3%	6/3886 0.1%	TraesCS5B01G171000 TraesCS1D01G357100 TraesCS5A01G173600 TraesCS1A01G066400 TraesCS5D01G178100 TraesCS1D01G067500
34623	cellular macromolecular complex disassembly	0.0036308	0.037602	6/1525 0.3%	6/3886 0.1%	TraesCS6A01G247000 TraesCS2A01G227300 TraesCS6B01G277600 TraesCS6D01G229200 TraesCS2B01G255200 TraesCS2D01G235200
22411	cellular component disassembly	0.0036308	0.037602	6/1525 0.3%	6/3886 0.1%	TraesCS6A01G247000 TraesCS2A01G227300 TraesCS6B01G277600 TraesCS6D01G229200 TraesCS2B01G255200 TraesCS2D01G235200
51261	protein depolymerization	0.0036308	0.037602	6/1525 0.3%	6/3886 0.1%	TraesCS6A01G247000 TraesCS2A01G227300 TraesCS6B01G277600 TraesCS6D01G229200 TraesCS2B01G255200 TraesCS2D01G235200
43241	protein complex disassembly	0.0036308	0.037602	6/1525 0.3%	6/3886 0.1%	TraesCS6A01G247000 TraesCS2A01G227300 TraesCS6B01G277600 TraesCS6D01G229200 TraesCS2B01G255200 TraesCS2D01G235200
30964	NADH dehydrogenase complex	0.0036308	0.037602	6/1525 0.3%	6/3886 0.1%	TraesCS5B01G171000 TraesCS1D01G357100 TraesCS5A01G173600 TraesCS1A01G066400 TraesCS5D01G178100 TraesCS1D01G067500
43547	positive regulation of GTPase activity	0.0036308	0.037602	6/1525 0.3%	6/3886 0.1%	TraesCS2D01G225300 Triticum_aestivum_newGene_27700 Triticum_aestivum_newGene_28357 TraesCS2B01G245000 TraesCS2A01G219400 Triticum_aestivum_newGene_27701
43624	cellular protein complex disassembly	0.0036308	0.037602	6/1525 0.3%	6/3886 0.1%	TraesCS6A01G247000 TraesCS2A01G227300 TraesCS6B01G277600 TraesCS6D01G229200 TraesCS2B01G255200 TraesCS2D01G235200
15095	magnesium ion transmembrane transporter activity	0.0036308	0.037602	6/1525 0.3%	6/3886 0.1%	TraesCS3B01G416000 TraesCS4D01G025300 TraesCS4B01G027800 TraesCS3D01G376700 TraesCS3A01G383600 TraesCS4A01G286400
15690	aluminum ion transport	0.0036308	0.037602	6/1525 0.3%	6/3886 0.1%	TraesCS1D01G417500 TraesCS1D01G417400 TraesCS1B01G440100 TraesCS1B01G440000 TraesCS1A01G410100 TraesCS1A01G410200
15693	magnesium ion transport	0.0036308	0.037602	6/1525 0.3%	6/3886 0.1%	TraesCS3B01G416000 TraesCS4D01G025300 TraesCS4B01G027800 TraesCS3D01G376700 TraesCS3A01G383600 TraesCS4A01G286400
15977	carbon fixation	0.0036308	0.037602	6/1525 0.3%	6/3886 0.1%	Triticum_aestivum_newGene_13165 TraesCS3B01G011200 Triticum_aestivum_newGene_38970 Triticum_aestivum_newGene_43200 TraesCS3B01G008500 TraesCS3D01G005000
8154	actin polymerization or depolymerization	0.0036308	0.037602	6/1525 0.3%	6/3886 0.1%	TraesCS6A01G247000 TraesCS2A01G227300 TraesCS6B01G277600 TraesCS6D01G229200 TraesCS2B01G255200 TraesCS2D01G235200
32787	monocarboxylic acid metabolic process	0.0036375	0.037602	51/1525 3.3%	96/3886 2.4%	TraesCS1D01G242500 TraesCS1A01G263600 TraesCS5B01G305300 TraesCS7B01G286200 TraesCS1B01G420700 TraesCS3D01G308100 TraesCS1A01G410200 TraesCS4A01G388100 TraesCS6D01G133200 TraesCS1B01G053600 TraesCS1D01G037900 TraesCS6B01G395700 TraesCS6B01G160000 TraesCS4D01G314400 TraesCS2B01G445300 TraesCS1A01G040600 TraesCS7B01G502200 TraesCS1D01G417400 TraesCS6B01G404700 TraesCS1B01G440100 TraesCS1B01G226500 …
5342	organic acid transmembrane transporter activity	0.0036621	0.037602	19/1525 1.2%	29/3886 0.7%	TraesCS4B01G193900 TraesCS5D01G307000 TraesCS5B01G243600 TraesCS3D01G157800 TraesCS1B01G315900 TraesCS1D01G304800 TraesCS5D01G252800 TraesCS6B01G115200 TraesCS3A01G149900 TraesCS5B01G300300 Triticum_aestivum_newGene_12748 TraesCS4A01G407600 TraesCS3B01G177000 Triticum_aestivum_newGene_12749 TraesCS5D01G270600 TraesCS1A01G305200 TraesCS5A01G246300 TraesCS4D01G194800 TraesCS3B01G213600
46943	carboxylic acid transmembrane transporter activity	0.0036621	0.037602	19/1525 1.2%	29/3886 0.7%	TraesCS4B01G193900 TraesCS5D01G307000 TraesCS5B01G243600 TraesCS3D01G157800 TraesCS1B01G315900 TraesCS1D01G304800 TraesCS5D01G252800 TraesCS6B01G115200 TraesCS3A01G149900 TraesCS5B01G300300 Triticum_aestivum_newGene_12748 TraesCS4A01G407600 TraesCS3B01G177000 Triticum_aestivum_newGene_12749 TraesCS5D01G270600 TraesCS1A01G305200 TraesCS5A01G246300 TraesCS4D01G194800 TraesCS3B01G213600
5740	mitochondrial envelope	0.0038615	0.039461	22/1525 1.4%	35/3886 0.9%	TraesCS4B01G193900 TraesCS2B01G335500 TraesCS5D01G307000 TraesCS5B01G243600 TraesCS3D01G157800 TraesCS5A01G173600 TraesCS2B01G616800 TraesCS5D01G252800 TraesCS3A01G149900 TraesCS5B01G300300 TraesCS4A01G407600 TraesCS2D01G566900 TraesCS3B01G177000 TraesCS5B01G171000 TraesCS2D01G314800 TraesCS1D01G357100 TraesCS1A01G066400 TraesCS5A01G246300 TraesCS5D01G178100 TraesCS4D01G194800 TraesCS1D01G067500 …
70882	cellular cell wall organization or biogenesis	0.0039991	0.040481	12/1525 0.7%	16/3886 0.4%	Triticum_aestivum_newGene_24981 TraesCS4D01G244000 TraesCS7B01G037700 TraesCS4D01G021300 TraesCS2B01G144900 Triticum_aestivum_newGene_22543 TraesCS4A01G290500 TraesCS7A01G136600 TraesCS7D01G136500 Triticum_aestivum_newGene_52718 TraesCS7D01G171900 TraesCS7B01G076200
42546	cell wall biogenesis	0.0039991	0.040481	12/1525 0.7%	16/3886 0.4%	Triticum_aestivum_newGene_24981 TraesCS4D01G244000 TraesCS7B01G037700 TraesCS4D01G021300 TraesCS2B01G144900 Triticum_aestivum_newGene_22543 TraesCS4A01G290500 TraesCS7A01G136600 TraesCS7D01G136500 Triticum_aestivum_newGene_52718 TraesCS7D01G171900 TraesCS7B01G076200
15300	solute:solute antiporter activity	0.0046533	0.046883	13/1525 0.8%	18/3886 0.4%	TraesCS3A01G340500 TraesCS3D01G157800 TraesCS5D01G081200 TraesCS3A01G149900 TraesCS3B01G177000 TraesCS1D01G418100 TraesCS5B01G149200 TraesCS1B01G440400 TraesCS1A01G120600 TraesCS5D01G346300 TraesCS5A01G512200 Triticum_aestivum_newGene_72355 TraesCS4B01G343000
