# Supplementary material for: Comparative Transcriptome Analysis of Male Sterile Anthers Induced by High Temperature in Wheat (Triticum aestivum L.)
Source: Front Plant Sci. 2021 Oct 25;12:727966. doi: 10.3389/fpls.2021.727966 (PMC8573241; doi:10.3389/fpls.2021.727966)
Supplement: Supplementary file 10 [file Data_Sheet_4.xlsx]

## Sheet: Total DEGs-KEGG class
#KEGG Category	gene Count(K Number Count)
Cellular Processes	79 (25)
	Transport and catabolism	79 (25)
		Endocytosis	57 (13)
		Peroxisome	8 (5)
		Phagosome	14 (7)
Environmental Information Processing	100 (28)
	Membrane transport	7 (1)
		ABC transporters	7 (1)
	Signal transduction	93 (27)
		Phosphatidylinositol signaling system	33 (6)
		Plant hormone signal transduction	60 (21)
Genetic Information Processing	390 (130)
	Folding, sorting and degradation	198 (48)
		Proteasome	2 (2)
		Protein export	20 (6)
		Protein processing in endoplasmic reticulum	123 (15)
		RNA degradation	22 (11)
		SNARE interactions in vesicular transport	14 (6)
		Sulfur relay system	1 (1)
		Ubiquitin mediated proteolysis	37 (13)
	Replication and repair	56 (23)
		Base excision repair	13 (5)
		DNA replication	38 (13)
		Homologous recombination	22 (5)
		Mismatch repair	29 (10)
		Non-homologous end-joining	3 (2)
		Nucleotide excision repair	27 (8)
	Transcription	49 (17)
		Basal transcription factors	10 (3)
		RNA polymerase	12 (5)
		Spliceosome	27 (9)
	Translation	107 (46)
		Aminoacyl-tRNA biosynthesis	9 (6)
		RNA transport	30 (17)
		Ribosome	41 (13)
		Ribosome biogenesis in eukaryotes	20 (9)
		mRNA surveillance pathway	13 (6)
Metabolism	571 (228)
	Amino acid metabolism	84 (46)
		Alanine, aspartate and glutamate metabolism	10 (7)
		Arginine and proline metabolism	12 (7)
		Arginine biosynthesis	6 (5)
		Cysteine and methionine metabolism	22 (10)
		Glycine, serine and threonine metabolism	18 (8)
		Histidine metabolism	2 (2)
		Lysine biosynthesis	4 (2)
		Lysine degradation	2 (2)
		Phenylalanine metabolism	7 (6)
		Phenylalanine, tyrosine and tryptophan biosynthesis	2 (2)
		Tryptophan metabolism	8 (6)
		Tyrosine metabolism	12 (5)
		Valine, leucine and isoleucine degradation	7 (3)
	Biosynthesis of other secondary metabolites	83 (27)
		Flavone and flavonol biosynthesis	1 (1)
		Flavonoid biosynthesis	12 (8)
		Glucosinolate biosynthesis	2 (1)
		Isoquinoline alkaloid biosynthesis	6 (3)
		Monobactam biosynthesis	2 (2)
		Phenylpropanoid biosynthesis	64 (14)
		Stilbenoid, diarylheptanoid and gingerol biosynthesis	5 (2)
		Tropane, piperidine and pyridine alkaloid biosynthesis	3 (2)
	Carbohydrate metabolism	225 (70)
		Amino sugar and nucleotide sugar metabolism	33 (14)
		Ascorbate and aldarate metabolism	14 (7)
		Citrate cycle (TCA cycle)	7 (4)
		Fructose and mannose metabolism	18 (7)
		Galactose metabolism	46 (9)
		Glycolysis / Gluconeogenesis	41 (16)
		Glyoxylate and dicarboxylate metabolism	13 (6)
		Inositol phosphate metabolism	21 (6)
		Pentose and glucuronate interconversions	33 (7)
		Pentose phosphate pathway	11 (4)
		Propanoate metabolism	6 (2)
		Pyruvate metabolism	19 (9)
		Starch and sucrose metabolism	101 (23)
	Energy metabolism	68 (30)
		Carbon fixation in photosynthetic organisms	13 (6)
		Nitrogen metabolism	23 (6)
		Oxidative phosphorylation	20 (8)
		Photosynthesis	6 (5)
		Sulfur metabolism	6 (5)
	Global and overview maps	65 (35)
		2-Oxocarboxylic acid metabolism	4 (3)
		Biosynthesis of amino acids	34 (18)
		Carbon metabolism	48 (23)
		Fatty acid metabolism	3 (3)
	Glycan biosynthesis and metabolism	5 (4)
		Glycosaminoglycan degradation	1 (1)
		Glycosphingolipid biosynthesis - ganglio series	1 (1)
		N-Glycan biosynthesis	2 (1)
		Other glycan degradation	3 (3)
	Lipid metabolism	81 (36)
		Biosynthesis of unsaturated fatty acids	2 (2)
		Cutin, suberine and wax biosynthesis	9 (4)
		Ether lipid metabolism	6 (2)
		Fatty acid biosynthesis	2 (2)
		Fatty acid degradation	8 (4)
		Fatty acid elongation	4 (1)
		Glycerolipid metabolism	29 (8)
		Glycerophospholipid metabolism	26 (9)
		Linoleic acid metabolism	1 (1)
		Sphingolipid metabolism	8 (3)
		Steroid biosynthesis	7 (6)
		alpha-Linolenic acid metabolism	11 (4)
	Metabolism of cofactors and vitamins	24 (15)
		Biotin metabolism	1 (1)
		Nicotinate and nicotinamide metabolism	1 (1)
		One carbon pool by folate	2 (1)
		Pantothenate and CoA biosynthesis	5 (3)
		Porphyrin and chlorophyll metabolism	6 (4)
		Riboflavin metabolism	1 (1)
		Ubiquinone and other terpenoid-quinone biosynthesis	8 (4)
	Metabolism of other amino acids	57 (17)
		Cyanoamino acid metabolism	19 (5)
		Glutathione metabolism	28 (6)
		Selenocompound metabolism	2 (2)
		Taurine and hypotaurine metabolism	5 (1)
		beta-Alanine metabolism	3 (3)
	Metabolism of terpenoids and polyketides	42 (24)
		Brassinosteroid biosynthesis	3 (3)
		Carotenoid biosynthesis	6 (3)
		Diterpenoid biosynthesis	8 (5)
		Limonene and pinene degradation	1 (1)
		Monoterpenoid biosynthesis	5 (2)
		Sesquiterpenoid and triterpenoid biosynthesis	2 (2)
		Terpenoid backbone biosynthesis	9 (6)
		Zeatin biosynthesis	9 (3)
	Nucleotide metabolism	40 (21)
		Purine metabolism	34 (18)
		Pyrimidine metabolism	27 (13)
Organismal Systems	66 (17)
	Environmental adaptation	66 (17)
		Circadian rhythm - plant	4 (3)
		Plant-pathogen interaction	62 (14)

## Sheet: UP-degs-KEGG_stat
#KEGG_n	762	KEGG_N	19371
#Pathway	ko_ID	Selected_gene_in_Pathway	AllGene_in_Pathway	Selected_gene_in_All_pathways	AllGene_in_All_pathways	Gene_id	KEGG_Orthology
Protein processing in endoplasmic reticulum	ko04141	117	889	762	19371	TraesCS1A01G285000;TraesCS1B01G294300;TraesCS1B01G333200;TraesCS1D01G201900;TraesCS1D01G223800;TraesCS1D01G284000;TraesCS1D01G330800;TraesCS2A01G033700;TraesCS2A01G507000;TraesCS2B01G047400;TraesCS2B01G125400;TraesCS2B01G535000;TraesCS2D01G033200;TraesCS2D01G420100;TraesCS2D01G600900;TraesCS3A01G033900;TraesCS3A01G034000;TraesCS3A01G034500;TraesCS3A01G112900;TraesCS3A01G113000;TraesCS3A01G113100;…	K03283+K03283+K09490+K03094+K13525+K03283+K10661+K04079+K03283+K04079+K09490+K03283+K04079+K03094+K09490+K13993+K13993+K13993+K13993+K13993+K13993+K13993+K13993+K13993+K13993+K13993+K13993+K13993+K13993+K13993+K03283+K13993+K13993+K13993+K13993+K13993+K13993+K13993+K13993+K13993+K13993+K13993+K13993+K13993+K13993+K03283+K03283+K13993+K13993+K13993+K03283+K03283+K08057+K13993+K03283+K09562+K13993+…
Starch and sucrose metabolism	ko00500	51	837	762	19371	TraesCS1A01G064800;TraesCS1A01G182100;TraesCS1B01G083100;TraesCS1D01G065600;TraesCS1D01G123700;TraesCS2A01G161200;TraesCS2A01G384400;TraesCS2A01G488900;TraesCS2A01G591900;TraesCS2B01G327300;TraesCS2B01G401600;TraesCS2B01G516700;TraesCS2B01G591900;TraesCS2D01G381000;TraesCS2D01G489200;TraesCS2D01G562400;TraesCS3A01G174100;TraesCS3A01G447500;TraesCS3B01G204500;TraesCS4A01G199200;TraesCS4A01G248700;…	K16055+K01051+K16055+K16055+K00844+K01087+K05350+K01193+K05349+K00700+K05350+K01193+K05349+K05350+K01193+K05349+K01051+K01188+K01051+K00012+K01193+K01193+K01193+K01193+K00012+K01184+K01193+K01193+K16055+K05349+K16055+K05349+K01193+K16055+K05349+K01193+K16055+K01176+K16055+K01213+K00847+K00700+K00847+K01193+K01213+K01188+K00847+K05350+K01187+K01187+K00847
Phenylpropanoid biosynthesis	ko00940	44	1135	762	19371	TraesCS1B01G321900;TraesCS1D01G176400;TraesCS1D01G354100;TraesCS2A01G145800;TraesCS2A01G384400;TraesCS2A01G591900;TraesCS2B01G124600;TraesCS2B01G401600;TraesCS2B01G591900;TraesCS2B01G613900;TraesCS2D01G107900;TraesCS2D01G108500;TraesCS2D01G381000;TraesCS2D01G562400;TraesCS3A01G329200;TraesCS3A01G447500;TraesCS3A01G510900;TraesCS3B01G210000;TraesCS3B01G359400;TraesCS3D01G305300;TraesCS3D01G440900;…	K12355+K09755+K00430+K01904+K05350+K05349+K00430+K05350+K05349+K00430+K00430+K00430+K05350+K05349+K09756+K01188+K00430+K00430+K09756+K00430+K00083+K00430+K00430+K10775+K13065+K00430+K13065+K05349+K13065+K05349+K05349+K13064+K00430+K00588+K00083+K00430+K00430+K00430+K00430+K01188+K00083+K00430+K05350+K00430
Plant hormone signal transduction	ko04075	39	961	762	19371	TraesCS1A01G068900;TraesCS1A01G278400;TraesCS1A01G343300;TraesCS1B01G287300;TraesCS1D01G277600;TraesCS2B01G116900;TraesCS3A01G276500;TraesCS3A01G371800;TraesCS4A01G192200;TraesCS4A01G302400;TraesCS4B01G011400;TraesCS4B01G038100;TraesCS4B01G123200;TraesCS4B01G161800;TraesCS4B01G364700;TraesCS4D01G009500;TraesCS4D01G036000;TraesCS4D01G121300;TraesCS5A01G533100;TraesCS5B01G211000;TraesCS5D01G219300;…	K14487+K13946+K14484+K13946+K13946+K14514+K14484+K14432+K14487+K14490+K14490+K14513+K14487+K14486+K13464+K14490+K14513+K14487+K13464+K13464+K13464+K14516+K14491+K14488+K14488+K14484+K13449+K14491+K13449+K14484+K14488+K14484+K14491+K13464+K14484+K14491+K14489+K13415+K13464
Ribosome	ko03010	37	1265	762	19371	TraesCS1A01G227100;TraesCS1B01G241200;TraesCS1B01G339400;TraesCS1D01G228700;TraesCS2A01G458000;TraesCS2A01G458100;TraesCS2B01G430100;TraesCS2B01G480600;TraesCS2D01G092300;TraesCS2D01G458700;TraesCS2D01G459200;TraesCS2D01G474700;TraesCS3A01G280300;TraesCS3B01G377000;TraesCS4A01G270300;TraesCS4B01G218100;TraesCS5B01G260700;TraesCS5B01G409400;TraesCS5B01G554700;TraesCS5D01G269800;TraesCS5D01G414600;…	K02927+K02927+K02958+K02927+K02927+K02927+K02975+K02927+K02927+K02927+K02927+K02927+K02887+K02976+K02932+K02927+K02927+K02996+K02960+K02927+K02996+K02927+K02927+K02927+K02927+K02927+K02927+K02992+K02927+K02927+K02927+K02977+K02987+K02927+K02927+K02927+K02927
DNA replication	ko03030	35	229	762	19371	TraesCS1A01G085000;TraesCS1A01G104500;TraesCS1A01G130700;TraesCS1A01G264000;TraesCS1B01G102200;TraesCS1B01G274600;TraesCS1D01G139000;TraesCS1D01G264100;TraesCS2A01G364000;TraesCS2A01G451900;TraesCS2A01G522700;TraesCS2B01G473200;TraesCS2D01G451700;TraesCS3A01G172400;TraesCS3B01G224600;TraesCS4A01G058000;TraesCS4B01G246900;TraesCS4D01G246300;TraesCS5D01G135000;TraesCS6A01G360600;TraesCS6A01G413400;…	K07466+K07466+K02324+K02540+K07466+K02540+K02324+K02540+K04802+K10742+K07466+K10742+K10742+K10740+K02212+K07466+K07466+K07466+K10743+K02209+K10739+K04802+K10739+K10739+K02209+K04802+K02321+K02321+K07466+K03505+K07466+K04802+K07466+K07466+K07466
Endocytosis	ko04144	33	540	762	19371	TraesCS1A01G285000;TraesCS1B01G294300;TraesCS1D01G284000;TraesCS1D01G379900;TraesCS2A01G507000;TraesCS2B01G535000;TraesCS3B01G096400;TraesCS3B01G390700;TraesCS3D01G081400;TraesCS3D01G351900;TraesCS3D01G352400;TraesCS4A01G098100;TraesCS4A01G098600;TraesCS4B01G059200;TraesCS4B01G205700;TraesCS4D01G206600;TraesCS5D01G386000;TraesCS5D01G475800;TraesCS6A01G342400;TraesCS6D01G121200;TraesCS6D01G322800;…	K03283+K03283+K03283+K01115+K03283+K03283+K12198+K03283+K12198+K03283+K03283+K03283+K03283+K00889+K03283+K03283+K12191+K12183+K03283+K12483+K03283+K01115+K00889+K10591+K00889+K12486+K01115+K03283+K18443+K00889+K12196+K03283+K01115
Plant-pathogen interaction	ko04626	31	764	762	19371	TraesCS1A01G298600;TraesCS1B01G295200;TraesCS1B01G295300;TraesCS1D01G292700;TraesCS2A01G033700;TraesCS2A01G166200;TraesCS2A01G233900;TraesCS2A01G461800;TraesCS2A01G461900;TraesCS2B01G047400;TraesCS2B01G483400;TraesCS2B01G483500;TraesCS2D01G033200;TraesCS2D01G380500;TraesCS2D01G462000;TraesCS2D01G462100;TraesCS3A01G229300;TraesCS3B01G255400;TraesCS3D01G227400;TraesCS4A01G283400;TraesCS4D01G027600;…	K13424+K13447+K13447+K13424+K04079+K02183+K13412+K13420+K13420+K04079+K13420+K13420+K04079+K13459+K13420+K13420+K13425+K13425+K13425+K13412+K13412+K13448+K05391+K05391+K05391+K13449+K05391+K13449+K13456+K05391+K13427
Galactose metabolism	ko00052	29	334	762	19371	TraesCS1A01G164900;TraesCS1B01G182000;TraesCS1D01G123700;TraesCS1D01G162000;TraesCS2A01G105900;TraesCS2A01G344000;TraesCS2A01G488900;TraesCS2B01G516700;TraesCS2D01G489200;TraesCS3A01G092800;TraesCS3D01G278000;TraesCS4A01G248700;TraesCS4A01G321700;TraesCS4A01G485700;TraesCS4B01G066000;TraesCS4B01G179300;TraesCS4B01G356800;TraesCS4D01G180800;TraesCS4D01G350500;TraesCS5A01G173200;TraesCS5B01G556600;…	K07407+K07407+K00844+K07407+K07407+K01785+K01193+K01193+K01193+K06617+K00850+K01193+K01193+K01193+K01193+K18819+K01193+K18819+K01193+K07407+K01193+K07407+K01193+K06617+K06617+K01193+K01187+K00850+K01187
Purine metabolism	ko00230	28	630	762	19371	TraesCS1A01G130700;TraesCS1B01G179900;TraesCS1D01G139000;TraesCS2A01G346300;TraesCS3A01G255800;TraesCS4B01G338400;TraesCS4D01G034800;TraesCS5A01G057700;TraesCS5A01G145100;TraesCS5B01G498800;TraesCS5B01G499000;TraesCS5D01G068900;TraesCS5D01G499000;TraesCS6A01G373000;TraesCS6B01G170800;TraesCS7A01G376000;TraesCS7B01G112000;TraesCS7B01G277600;TraesCS7B01G352800;TraesCS7D01G130500;TraesCS7D01G372500;…	K02324+K03002+K02324+K03013+K01951+K03021+K01939+K01933+K01522+K03006+K03006+K01933+K03006+K10807+K13811+K03025+K10808+K03025+K02321+K10807+K03025+K02321+K03021+K01427+K03505+K03006+K03006+K10807
Mismatch repair	ko03430	26	184	762	19371	TraesCS1A01G085000;TraesCS1A01G104500;TraesCS1B01G102200;TraesCS2A01G364000;TraesCS2A01G522700;TraesCS2B01G372400;TraesCS3A01G172400;TraesCS3A01G500600;TraesCS3B01G136600;TraesCS3D01G119400;TraesCS4A01G058000;TraesCS4B01G246900;TraesCS4D01G246300;TraesCS6A01G413400;TraesCS6B01G411100;TraesCS6B01G462700;TraesCS6D01G214400;TraesCS6D01G357600;Triticum_aestivum_newGene_16249;Triticum_aestivum_newGene…	K07466+K07466+K07466+K04802+K07466+K08736+K10740+K08734+K08737+K08737+K07466+K07466+K07466+K10739+K04802+K10739+K10739+K04802+K07466+K03505+K07466+K04802+K07466+K07466+K07466+K10746
Pyrimidine metabolism	ko00240	26	516	762	19371	TraesCS1A01G130700;TraesCS1B01G179900;TraesCS1D01G139000;TraesCS2A01G346300;TraesCS3A01G222100;TraesCS3A01G236700;TraesCS3A01G300900;TraesCS4B01G338400;TraesCS5B01G013800;TraesCS5B01G498800;TraesCS5B01G499000;TraesCS5D01G021400;TraesCS5D01G499000;TraesCS6A01G373000;TraesCS7A01G376000;TraesCS7B01G112000;TraesCS7B01G277600;TraesCS7B01G352800;TraesCS7D01G130500;TraesCS7D01G372500;TraesCS7D01G442100;…	K02324+K03002+K02324+K03013+K01937+K01937+K01493+K03021+K01520+K03006+K03006+K01520+K03006+K10807+K03025+K10808+K03025+K02321+K10807+K03025+K02321+K03021+K03505+K03006+K03006+K10807
Carbon metabolism	ko01200	26	927	762	19371	TraesCS1A01G273900;TraesCS1B01G283600;TraesCS1D01G123700;TraesCS1D01G274000;TraesCS2A01G034900;TraesCS2A01G219100;TraesCS2B01G244600;TraesCS2D01G034100;TraesCS2D01G224200;TraesCS3A01G146800;TraesCS3A01G184000;TraesCS3D01G275500;TraesCS3D01G278000;TraesCS4A01G131900;TraesCS4A01G373800;TraesCS4A01G406100;TraesCS4B01G172700;TraesCS4D01G174700;TraesCS4D01G322700;TraesCS7A01G075600;TraesCS7A01G238900;…	K03841+K03841+K00844+K03841+K15919+K01637+K01637+K15919+K01637+K00058+K01681+K00029+K00850+K15633+K01689+K00121+K15633+K15633+K03781+K01689+K00161+K14455+K03841+K01689+K00261+K00850
RNA transport	ko03013	24	634	762	19371	TraesCS1A01G065400;TraesCS1A01G065600;TraesCS1B01G083500;TraesCS1B01G266900;TraesCS1D01G066100;TraesCS1D01G066600;TraesCS2A01G390600;TraesCS2B01G408800;TraesCS2D01G388100;TraesCS2D01G520400;TraesCS3D01G318400;TraesCS5A01G042400;TraesCS5B01G034200;TraesCS5D01G050700;TraesCS6B01G139900;TraesCS7D01G349900;TraesCSU01G037000;Triticum_aestivum_newGene_18159;Triticum_aestivum_newGene_1857;Triticum_aesti…	K14297+K14293+K14297+K14319+K14297+K14293+K03260+K03260+K03260+K18213+K14293+K03254+K14293+K03254+K03248+K07936+K13126+K03262+K14297+K03239+K01164+K03246+K03239+K03248
Nucleotide excision repair	ko03420	24	246	762	19371	TraesCS1A01G085000;TraesCS1A01G104500;TraesCS1A01G130700;TraesCS1B01G102200;TraesCS1D01G139000;TraesCS2A01G364000;TraesCS2A01G522700;TraesCS3A01G172400;TraesCS4A01G058000;TraesCS4B01G246900;TraesCS4D01G246300;TraesCS6A01G413400;TraesCS6B01G411100;TraesCS6B01G462700;TraesCS6D01G214400;TraesCS6D01G357600;Triticum_aestivum_newGene_16249;Triticum_aestivum_newGene_34132;Triticum_aestivum_newGene_38886…	K07466+K07466+K02324+K07466+K02324+K04802+K07466+K10740+K07466+K07466+K07466+K10739+K04802+K10739+K10739+K04802+K07466+K03505+K10570+K07466+K04802+K07466+K07466+K07466
Glutathione metabolism	ko00480	24	458	762	19371	TraesCS1A01G078900;TraesCS1A01G095800;TraesCS2B01G087400;TraesCS2D01G070500;TraesCS3B01G538800;TraesCS3B01G540200;TraesCS3D01G130700;TraesCS3D01G299700;TraesCS3D01G486100;TraesCS4A01G106300;TraesCS4B01G044500;TraesCS4B01G197900;TraesCS5A01G424100;TraesCS5A01G432600;TraesCS5B01G426400;TraesCS5D01G254000;TraesCS5D01G432700;TraesCS6A01G373000;TraesCS7B01G084400;TraesCS7B01G112000;TraesCS7D01G078700;…	K00799+K01255+K00434+K00434+K00799+K00799+K00799+K00799+K00799+K00434+K00799+K00434+K00799+K00799+K00799+K00799+K00799+K10807+K00799+K10808+K00799+K10807+K00434+K10807
Glycolysis / Gluconeogenesis	ko00010	24	532	762	19371	TraesCS1A01G273900;TraesCS1B01G283600;TraesCS1D01G123700;TraesCS1D01G274000;TraesCS1D01G376300;TraesCS2A01G076600;TraesCS2A01G344000;TraesCS2D01G075200;TraesCS3D01G278000;TraesCS4A01G131900;TraesCS4A01G202100;TraesCS4A01G373800;TraesCS4A01G406100;TraesCS4B01G106300;TraesCS4B01G172700;TraesCS4D01G103000;TraesCS4D01G103100;TraesCS4D01G174700;TraesCS6B01G284600;TraesCS7A01G075600;TraesCS7A01G238900;…	K03841+K03841+K00844+K03841+K18857+K00016+K01785+K00016+K00850+K15633+K18857+K01689+K00121+K18857+K15633+K18857+K18857+K15633+K00128+K01689+K00161+K03841+K01689+K00850
Amino sugar and nucleotide sugar metabolism	ko00520	22	510	762	19371	TraesCS1A01G402500;TraesCS1D01G123700;TraesCS2A01G350700;TraesCS2B01G369000;TraesCS2B01G369100;TraesCS3A01G373800;TraesCS3B01G039000;TraesCS3B01G406000;TraesCS3B01G434500;TraesCS3D01G036100;TraesCS3D01G239400;TraesCS3D01G366500;TraesCS4A01G199200;TraesCS4A01G389300;TraesCS4B01G077100;TraesCS5B01G023700;TraesCS5D01G032700;TraesCS6A01G077000;TraesCS7A01G319000;TraesCS7B01G219800;TraesCS7D01G315500;…	K10046+K00844+K01183+K01183+K01183+K01183+K01809+K01183+K12373+K01809+K01183+K01183+K00012+K17497+K00012+K12450+K12450+K01183+K00847+K00847+K00847+K00847
Ubiquitin mediated proteolysis	ko04120	22	663	762	19371	TraesCS1D01G201900;TraesCS2D01G420100;TraesCS3A01G027900;TraesCS3A01G028900;TraesCS3A01G527600;TraesCS3B01G018000;TraesCS3D01G017000;TraesCS3D01G018100;TraesCS3D01G018300;TraesCS3D01G030300;TraesCS4B01G337400;TraesCS7B01G492200;TraesCS7D01G124300;TraesCSU01G043700;TraesCSU01G050700;Triticum_aestivum_newGene_10333;Triticum_aestivum_newGene_14829;Triticum_aestivum_newGene_23866;Triticum_aestivum_ne…	K03094+K03094+K04506+K04506+K03364+K04506+K04506+K04506+K04506+K04506+K03094+K03094+K04706+K04506+K04506+K03357+K10581+K10591+K10570+K04506+K04506+K04506
Spliceosome	ko03040	22	761	762	19371	TraesCS1A01G285000;TraesCS1B01G294300;TraesCS1D01G284000;TraesCS2A01G507000;TraesCS2B01G535000;TraesCS3B01G390700;TraesCS3D01G112900;TraesCS3D01G351900;TraesCS3D01G352400;TraesCS4A01G098100;TraesCS4A01G098600;TraesCS4B01G205700;TraesCS4D01G206600;TraesCS5A01G040700;TraesCS6A01G342400;TraesCS6D01G322800;TraesCS7A01G176000;TraesCS7A01G238700;TraesCS7B01G103700;TraesCS7D01G199800;Triticum_aestivum_n…	K03283+K03283+K03283+K03283+K03283+K03283+K12818+K03283+K03283+K03283+K03283+K03283+K03283+K12837+K03283+K03283+K06063+K12854+K12854+K12854+K03283+K03283
Protein export	ko03060	20	254	762	19371	TraesCS1B01G333200;TraesCS2B01G125400;TraesCS2D01G600900;TraesCS3A01G322800;TraesCS3A01G424100;TraesCS3B01G342900;TraesCS3D01G308700;TraesCS4B01G117800;TraesCS5A01G015200;TraesCS5B01G065900;TraesCS5D01G070100;TraesCS5D01G305500;TraesCS5D01G546100;TraesCS7A01G430600;TraesCS7B01G097200;TraesCS7B01G330900;TraesCS7B01G331400;TraesCS7D01G422600;TraesCS7D01G423100;Triticum_aestivum_newGene_64581	K09490+K09490+K09490+K03106+K09648+K03106+K03106+K03106+K09481+K09490+K09490+K09490+K10956+K09490+K10956+K09490+K09490+K09490+K09490+K03217
Homologous recombination	ko03440	20	241	762	19371	TraesCS1A01G085000;TraesCS1A01G104500;TraesCS1B01G102200;TraesCS2A01G522700;TraesCS3A01G172400;TraesCS4A01G023100;TraesCS4A01G058000;TraesCS4B01G246900;TraesCS4B01G280400;TraesCS4D01G246300;TraesCS6A01G413400;TraesCS6B01G462700;TraesCS6D01G214400;Triticum_aestivum_newGene_16249;Triticum_aestivum_newGene_34132;Triticum_aestivum_newGene_41360;Triticum_aestivum_newGene_55189;Triticum_aestivum_newGen…	K07466+K07466+K07466+K07466+K10740+K03165+K07466+K07466+K03165+K07466+K10739+K10739+K10739+K07466+K03505+K07466+K07466+K07466+K03165+K07466
RNA degradation	ko03018	20	431	762	19371	TraesCS2A01G103300;TraesCS2B01G120600;TraesCS2D01G102800;TraesCS2D01G310000;TraesCS3D01G126900;TraesCS3D01G278000;TraesCS4A01G079000;TraesCS4A01G373800;TraesCS4A01G409100;TraesCS4B01G094600;TraesCS4B01G245200;TraesCS4D01G244200;TraesCS6D01G127000;TraesCS7A01G075600;TraesCS7D01G071200;TraesCSU01G037000;Triticum_aestivum_newGene_37004;Triticum_aestivum_newGene_43091;Triticum_aestivum_newGene_61132;…	K03654+K03654+K03654+K04077+K12581+K00850+K12606+K01689+K04077+K12598+K12606+K12606+K03679+K01689+K01689+K13126+K00850+K12611+K12591+K12591
Cysteine and methionine metabolism	ko00270	18	365	762	19371	TraesCS1D01G098100;TraesCS2A01G076600;TraesCS2A01G235900;TraesCS2D01G075200;TraesCS2D01G241800;TraesCS3A01G322600;TraesCS3D01G108700;TraesCS4A01G077400;TraesCS4A01G137000;TraesCS4B01G167100;TraesCS4B01G233500;TraesCS4B01G242700;TraesCS4D01G170300;TraesCS4D01G234700;TraesCS6D01G128900;TraesCS7B01G274100;TraesCS7D01G519000;Triticum_aestivum_newGene_22105	K05933+K00016+K00558+K00016+K00558+K00547+K01762+K00558+K00827+K00827+K00558+K00547+K00827+K00558+K01011+K14455+K00558+K00558
Ribosome biogenesis in eukaryotes	ko03008	17	378	762	19371	TraesCS2A01G038900;TraesCS2A01G125400;TraesCS3A01G450800;TraesCS3B01G106800;TraesCS3B01G220700;TraesCS3D01G091600;TraesCS3D01G506000;TraesCS7B01G251300;TraesCS7D01G347400;TraesCS7D01G349900;TraesCS7D01G532300;Triticum_aestivum_newGene_26590;Triticum_aestivum_newGene_42762;Triticum_aestivum_newGene_44128;Triticum_aestivum_newGene_52907;Triticum_aestivum_newGene_58906;Triticum_aestivum_newGene_69431	K14565+K14564+K14571+K14565+K03264+K14565+K14565+K14565+K14565+K07936+K14565+K01164+K14565+K14565+K03264+K14565+K14537
Biosynthesis of amino acids	ko01230	17	832	762	19371	TraesCS3A01G146800;TraesCS3A01G184000;TraesCS3D01G278000;TraesCS4A01G131900;TraesCS4A01G373800;TraesCS4B01G172700;TraesCS4B01G185000;TraesCS4B01G197700;TraesCS4D01G174700;TraesCS4D01G226800;TraesCS7A01G075600;TraesCS7B01G274100;TraesCS7D01G071200;Triticum_aestivum_newGene_25616;Triticum_aestivum_newGene_37004;Triticum_aestivum_newGene_57885;Triticum_aestivum_newGene_57886	K00058+K01681+K00850+K15633+K01689+K15633+K01755+K05359+K15633+K00215+K01689+K14455+K01689+K01693+K00850+K00286+K00286
Cyanoamino acid metabolism	ko00460	16	303	762	19371	TraesCS2A01G384400;TraesCS2A01G591900;TraesCS2B01G401600;TraesCS2B01G591900;TraesCS2D01G381000;TraesCS2D01G562400;TraesCS3A01G447500;TraesCS4B01G388500;TraesCS5A01G388200;TraesCS5B01G394000;TraesCS5D01G398300;TraesCS5D01G535600;TraesCS7A01G413400;TraesCS7D01G245000;TraesCS7D01G382800;Triticum_aestivum_newGene_47137	K05350+K05349+K05350+K05349+K05350+K05349+K01188+K13029+K05349+K05349+K05349+K13027+K13027+K01188+K05350+K13029
Oxidative phosphorylation	ko00190	15	846	762	19371	TraesCS1A01G107200;TraesCS1A01G253600;TraesCS1B01G264600;TraesCS1D01G257600;TraesCS3B01G322400;TraesCS3D01G287500;TraesCS4B01G300000;TraesCS6D01G338400;TraesCS7A01G239000;TraesCS7B01G134700;TraesCS7B01G421700;TraesCS7D01G236800;TraesCS7D01G500200;Triticum_aestivum_newGene_19895;Triticum_aestivum_newGene_35196	K01507+K01507+K01507+K01535+K02140+K02140+K01535+K02260+K02259+K02259+K01535+K02259+K01535+K02145+K01535
Fructose and mannose metabolism	ko00051	14	259	762	19371	TraesCS1A01G273900;TraesCS1B01G283600;TraesCS1D01G123700;TraesCS1D01G274000;TraesCS3B01G039000;TraesCS3D01G036100;TraesCS3D01G278000;TraesCS4A01G389300;TraesCS7A01G319000;TraesCS7B01G219800;TraesCS7B01G387900;TraesCS7D01G315500;Triticum_aestivum_newGene_37004;Triticum_aestivum_newGene_47217	K03841+K03841+K00844+K03841+K01809+K01809+K00850+K17497+K00847+K00847+K03841+K00847+K00850+K00847
Pentose and glucuronate interconversions	ko00040	13	228	762	19371	TraesCS1A01G182100;TraesCS3A01G174100;TraesCS3B01G204500;TraesCS3B01G344900;TraesCS3D01G310400;TraesCS4A01G199200;TraesCS4B01G077100;TraesCS4B01G086400;TraesCS6A01G378400;TraesCS6B01G284600;TraesCS7A01G162500;TraesCS7D01G164200;Triticum_aestivum_newGene_43293	K01051+K01051+K01051+K01728+K01728+K00012+K00012+K01184+K01728+K00128+K01213+K01213+K01728
RNA polymerase	ko03020	12	201	762	19371	TraesCS1B01G179900;TraesCS2A01G346300;TraesCS4B01G338400;TraesCS5B01G498800;TraesCS5B01G499000;TraesCS5D01G499000;TraesCS7A01G376000;TraesCS7B01G277600;TraesCS7D01G372500;Triticum_aestivum_newGene_10743;Triticum_aestivum_newGene_68348;Triticum_aestivum_newGene_68350	K03002+K03013+K03021+K03006+K03006+K03006+K03025+K03025+K03025+K03021+K03006+K03006
Phagosome	ko04145	12	319	762	19371	TraesCS1A01G258800;TraesCS1B01G269400;TraesCS1D01G258800;TraesCS4A01G364000;TraesCS5A01G015200;TraesCS5B01G509400;TraesCS5D01G546100;TraesCS7B01G096200;TraesCS7B01G097200;Triticum_aestivum_newGene_19895;Triticum_aestivum_newGene_3132;Triticum_aestivum_newGene_61836	K07375+K07375+K07375+K08057+K09481+K08057+K10956+K04392+K10956+K02145+K08057+K07375
Base excision repair	ko03410	12	144	762	19371	TraesCS1A01G130700;TraesCS1D01G139000;TraesCS1D01G330500;TraesCS2A01G364000;TraesCS6B01G411100;TraesCS6D01G357600;TraesCS7A01G414700;TraesCS7B01G314600;TraesCS7D01G407800;TraesCS7D01G496200;Triticum_aestivum_newGene_34132;Triticum_aestivum_newGene_49404	K02324+K02324+K10798+K04802+K04802+K04802+K10798+K10798+K10798+K01246+K03505+K04802
Flavonoid biosynthesis	ko00941	11	241	762	19371	TraesCS2A01G025500;TraesCS2A01G579500;TraesCS4B01G302300;TraesCS5A01G222900;TraesCS5B01G222000;TraesCS5B01G488900;TraesCS6A01G001500;TraesCS6D01G004300;TraesCS6D01G295800;TraesCS7A01G127600;Triticum_aestivum_newGene_29601	K00660+K08695+K13065+K13065+K13065+K01859+K05277+K05277+K05278+K00588+K13083
Glycine, serine and threonine metabolism	ko00260	10	232	762	19371	TraesCS2A01G034900;TraesCS2D01G034100;TraesCS3A01G146800;TraesCS4A01G131900;TraesCS4A01G137000;TraesCS4B01G167100;TraesCS4B01G172700;TraesCS4D01G170300;TraesCS4D01G174700;TraesCS6D01G355000	K15919+K15919+K00058+K15633+K00827+K00827+K15633+K00827+K15633+K00130
Basal transcription factors	ko03022	10	208	762	19371	TraesCS3D01G326400;TraesCS4A01G081500;TraesCS4B01G222300;TraesCS4D01G222800;TraesCS5A01G437400;TraesCS5A01G437500;TraesCS5B01G440000;TraesCS5D01G444400;Triticum_aestivum_newGene_25611;Triticum_aestivum_newGene_25613	K03122+K03138+K03138+K03138+K03122+K03122+K03122+K03122+K03130+K03130
Tyrosine metabolism	ko00350	9	190	762	19371	TraesCS1D01G376300;TraesCS4A01G202100;TraesCS4A01G406100;TraesCS4B01G106300;TraesCS4B01G385600;TraesCS4D01G103000;TraesCS4D01G103100;TraesCS7A01G387000;TraesCS7B01G274100	K18857+K18857+K00121+K18857+K00422+K18857+K18857+K01592+K14455
Terpenoid backbone biosynthesis	ko00900	9	199	762	19371	TraesCS2B01G445900;TraesCS3B01G260300;TraesCS3D01G258500;TraesCS6A01G100700;Triticum_aestivum_newGene_17884;Triticum_aestivum_newGene_30334;Triticum_aestivum_newGene_41504;Triticum_aestivum_newGene_49459;Triticum_aestivum_newGene_52797	K15793+K15889+K00787+K13789+K05906+K05906+K01597+K00787+K05906
Nitrogen metabolism	ko00910	9	192	762	19371	TraesCS2A01G294800;TraesCS2B01G311300;TraesCS2D01G292600;TraesCS3A01G230100;TraesCS3D01G254900;TraesCS6A01G017500;TraesCS6D01G020700;Triticum_aestivum_newGene_20988;Triticum_aestivum_newGene_2951	K01674+K01674+K01674+K01673+K02575+K10534+K10534+K01673+K00261
Ascorbate and aldarate metabolism	ko00053	9	136	762	19371	TraesCS1A01G402500;TraesCS2B01G087400;TraesCS2D01G070500;TraesCS4A01G106300;TraesCS4A01G199200;TraesCS4B01G077100;TraesCS4B01G197900;TraesCS6B01G284600;TraesCS7D01G249200	K10046+K00434+K00434+K00434+K00012+K00012+K00434+K00128+K00434
Glyoxylate and dicarboxylate metabolism	ko00630	9	246	762	19371	TraesCS2A01G034900;TraesCS2A01G219100;TraesCS2B01G244600;TraesCS2D01G034100;TraesCS2D01G224200;TraesCS3A01G184000;TraesCS4B01G373600;TraesCS4D01G322700;TraesCS4D01G363700	K15919+K01637+K01637+K15919+K01637+K01681+K01433+K03781+K01433
alpha-Linolenic acid metabolism	ko00592	9	238	762	19371	TraesCS1D01G376300;TraesCS3B01G513100;TraesCS4A01G202100;TraesCS4B01G106300;TraesCS4B01G237600;TraesCS4D01G103000;TraesCS4D01G103100;TraesCS7D01G229500;Triticum_aestivum_newGene_68492	K18857+K08241+K18857+K18857+K01723+K18857+K18857+K08241+K00232
Glycerolipid metabolism	ko00561	9	237	762	19371	TraesCS1A01G164900;TraesCS1B01G182000;TraesCS1D01G162000;TraesCS2A01G105900;TraesCS5A01G173200;TraesCS5D01G177700;TraesCS6B01G284600;TraesCS7D01G498800;Triticum_aestivum_newGene_63336	K07407+K07407+K07407+K07407+K07407+K07407+K00128+K13508+K03715
Phosphatidylinositol signaling system	ko04070	9	231	762	19371	TraesCS2A01G084000;TraesCS2A01G166200;TraesCS4B01G059200;TraesCS5D01G160300;Triticum_aestivum_newGene_19064;Triticum_aestivum_newGene_24650;Triticum_aestivum_newGene_27095;Triticum_aestivum_newGene_3669;Triticum_aestivum_newGene_52609	K05857+K02183+K00889+K05857+K00889+K00889+K15422+K01092+K00889
Sphingolipid metabolism	ko00600	8	118	762	19371	TraesCS1A01G164900;TraesCS1B01G182000;TraesCS1D01G162000;TraesCS2A01G105900;TraesCS5A01G173200;TraesCS5D01G177700;TraesCS7A01G187000;TraesCS7A01G320000	K07407+K07407+K07407+K07407+K07407+K07407+K04713+K17108
Aminoacyl-tRNA biosynthesis	ko00970	8	292	762	19371	TraesCS1A01G235200;TraesCS6B01G313700;TraesCS6B01G352300;TraesCS6D01G073500;TraesCS7A01G200500;TraesCS7B01G107300;TraesCS7D01G203800;Triticum_aestivum_newGene_54298	K01868+K01866+K01889+K01873+K01881+K01881+K01881+K01876
Inositol phosphate metabolism	ko00562	8	187	762	19371	TraesCS2A01G084000;TraesCS4B01G059200;TraesCS5D01G160300;Triticum_aestivum_newGene_19064;Triticum_aestivum_newGene_24650;Triticum_aestivum_newGene_27095;Triticum_aestivum_newGene_3669;Triticum_aestivum_newGene_52609	K05857+K00889+K05857+K00889+K00889+K15422+K01092+K00889
Fatty acid degradation	ko00071	8	161	762	19371	TraesCS1D01G376300;TraesCS4A01G202100;TraesCS4A01G406100;TraesCS4B01G106300;TraesCS4D01G103000;TraesCS4D01G103100;TraesCS6B01G284600;Triticum_aestivum_newGene_68492	K18857+K18857+K00121+K18857+K18857+K18857+K00128+K00232
Tryptophan metabolism	ko00380	8	212	762	19371	TraesCS1A01G113400;TraesCS2B01G037500;TraesCS3A01G033300;TraesCS4D01G322700;TraesCS5B01G429600;TraesCS5D01G436000;TraesCS6B01G284600;TraesCSU01G047500	K16903+K01426+K11816+K03781+K11817+K11817+K00128+K11816
Alanine, aspartate and glutamate metabolism	ko00250	8	200	762	19371	TraesCS3A01G077100;TraesCS4A01G137000;TraesCS4B01G167100;TraesCS4B01G185000;TraesCS4D01G034800;TraesCS4D01G170300;TraesCS7B01G274100;Triticum_aestivum_newGene_2951	K01953+K00827+K00827+K01755+K01939+K00827+K14455+K00261
Glycerophospholipid metabolism	ko00564	8	353	762	19371	TraesCS1D01G379900;TraesCS2A01G176400;TraesCS2D01G183800;TraesCS7A01G544900;TraesCS7D01G498800;Triticum_aestivum_newGene_24363;Triticum_aestivum_newGene_43717;Triticum_aestivum_newGene_63966	K01115+K01126+K01126+K01115+K13508+K00968+K01115+K01115
Cutin, suberine and wax biosynthesis	ko00073	8	130	762	19371	TraesCS1D01G158400;TraesCS2A01G367200;TraesCS2D01G195900;TraesCS3A01G205200;TraesCS3B01G237300;TraesCS3D01G210200;TraesCS7B01G110100;TraesCS7D01G084700	K15402+K17991+K15400+K15400+K15400+K15400+K17991+K13356
Ubiquinone and other terpenoid-quinone biosynthesis	ko00130	7	173	762	19371	TraesCS1D01G320300;TraesCS2A01G145800;TraesCS2B01G380700;TraesCS3A01G323800;TraesCS3D01G317400;TraesCS7A01G510700;TraesCS7D01G500100	K03809+K01904+K03183+K03809+K03809+K09833+K09833
Peroxisome	ko04146	7	304	762	19371	TraesCS4D01G322700;TraesCS5A01G258300;TraesCS5A01G258400;TraesCS5D01G266500;TraesCS7D01G084700;Triticum_aestivum_newGene_42033;Triticum_aestivum_newGene_68492	K03781+K13342+K13342+K13342+K13356+K13337+K00232
Glycosphingolipid biosynthesis - globo series	ko00603	7	38	762	19371	TraesCS1A01G164900;TraesCS1B01G182000;TraesCS1D01G162000;TraesCS2A01G105900;TraesCS3B01G434500;TraesCS5A01G173200;TraesCS5D01G177700	K07407+K07407+K07407+K07407+K12373+K07407+K07407
Phenylalanine metabolism	ko00360	6	192	762	19371	TraesCS2A01G145800;TraesCS2B01G037500;TraesCS4A01G401300;TraesCS6B01G258400;TraesCS7A01G127600;TraesCS7B01G274100	K01904+K01426+K10775+K13064+K00588+K14455
Steroid biosynthesis	ko00100	6	179	762	19371	TraesCS2D01G387000;TraesCS3B01G167400;TraesCS4B01G389300;TraesCS4D01G093600;TraesCS5B01G004800;Triticum_aestivum_newGene_5322	K01853+K09832+K05917+K14423+K01853+K00511
Pentose phosphate pathway	ko00030	6	205	762	19371	TraesCS1A01G273900;TraesCS1B01G283600;TraesCS1D01G274000;TraesCS3D01G278000;TraesCS7B01G387900;Triticum_aestivum_newGene_37004	K03841+K03841+K03841+K00850+K03841+K00850
ABC transporters	ko02010	6	98	762	19371	TraesCS2A01G009700;TraesCS3A01G117600;TraesCS3B01G136800;TraesCS3B01G401600;TraesCS6B01G199700;Triticum_aestivum_newGene_52359	K05658+K05658+K05658+K05658+K05658+K05658
mRNA surveillance pathway	ko03015	6	399	762	19371	TraesCS2A01G451700;TraesCS2A01G451800;TraesCS5A01G405300;TraesCSU01G037000;TraesCSU01G150500;TraesCSU01G155200	K14376+K14376+K14411+K13126+K03265+K14376
Arginine and proline metabolism	ko00330	6	213	762	19371	TraesCS2B01G037500;TraesCS6B01G284600;TraesCS7B01G274100;Triticum_aestivum_newGene_57885;Triticum_aestivum_newGene_57886;Triticum_aestivum_newGene_67890	K01426+K00128+K14455+K00286+K00286+K13427
Carbon fixation in photosynthetic organisms	ko00710	6	262	762	19371	TraesCS1A01G273900;TraesCS1B01G283600;TraesCS1D01G274000;TraesCS3D01G275500;TraesCS7B01G274100;TraesCS7B01G387900	K03841+K03841+K03841+K00029+K14455+K03841
Pyruvate metabolism	ko00620	6	325	762	19371	TraesCS2A01G076600;TraesCS2D01G075200;TraesCS3D01G275500;TraesCS6B01G245000;TraesCS6B01G284600;TraesCS7A01G238900	K00016+K00016+K00029+K01759+K00128+K00161
Diterpenoid biosynthesis	ko00904	5	123	762	19371	TraesCS1A01G119900;TraesCS1D01G120800;TraesCS2A01G535300;TraesCS2D01G537200;TraesCS3B01G328700	K04120+K04120+K14043+K14043+K04125
Arginine biosynthesis	ko00220	5	133	762	19371	TraesCS4B01G185000;TraesCS7B01G274100;Triticum_aestivum_newGene_27706;Triticum_aestivum_newGene_2951;Triticum_aestivum_newGene_67890	K01755+K14455+K01427+K00261+K13427
SNARE interactions in vesicular transport	ko04130	5	146	762	19371	TraesCS2B01G244700;TraesCS7B01G394300;Triticum_aestivum_newGene_44601;Triticum_aestivum_newGene_45194;Triticum_aestivum_newGene_64546	K08486+K08486+K08497+K08496+K08503
Photosynthesis	ko00195	5	475	762	19371	TraesCS2B01G311100;Triticum_aestivum_newGene_25716;Triticum_aestivum_newGene_30136;Triticum_aestivum_newGene_32935;Triticum_aestivum_newGene_64976	K02639+K02636+K02721+K02639+K02703
Pantothenate and CoA biosynthesis	ko00770	5	95	762	19371	TraesCS5B01G542300;TraesCS6A01G098300;TraesCS6B01G227200;Triticum_aestivum_newGene_26948;Triticum_aestivum_newGene_26958	K01918+K02201+K01922+K02201+K02201
Monoterpenoid biosynthesis	ko00902	5	51	762	19371	TraesCS2A01G371100;TraesCS2A01G371200;TraesCS2A01G371400;TraesCS2A01G478100;TraesCSU01G116700	K15095+K15095+K15095+K15086+K15086
Ether lipid metabolism	ko00565	4	101	762	19371	TraesCS1D01G379900;TraesCS7A01G544900;Triticum_aestivum_newGene_43717;Triticum_aestivum_newGene_63966	K01115+K01115+K01115+K01115
Porphyrin and chlorophyll metabolism	ko00860	4	166	762	19371	TraesCS6B01G136500;TraesCS7A01G239000;TraesCS7B01G134700;TraesCS7D01G236800	K01698+K02259+K02259+K02259
Valine, leucine and isoleucine degradation	ko00280	4	136	762	19371	TraesCS4A01G137000;TraesCS4B01G167100;TraesCS4D01G170300;TraesCS6B01G284600	K00827+K00827+K00827+K00128
Stilbenoid, diarylheptanoid and gingerol biosynthesis	ko00945	4	111	762	19371	TraesCS4B01G302300;TraesCS5A01G222900;TraesCS5B01G222000;TraesCS7A01G127600	K13065+K13065+K13065+K00588
2-Oxocarboxylic acid metabolism	ko01210	4	204	762	19371	TraesCS3A01G184000;TraesCS5D01G535600;TraesCS7A01G413400;TraesCS7B01G274100	K01681+K13027+K13027+K14455
Citrate cycle (TCA cycle)	ko00020	4	180	762	19371	TraesCS3A01G184000;TraesCS7A01G238900;TraesCS7B01G309200;Triticum_aestivum_newGene_61081	K01681+K00161+K01648+K01648
Fatty acid metabolism	ko01212	3	319	762	19371	TraesCS2D01G312000;Triticum_aestivum_newGene_46301;Triticum_aestivum_newGene_68492	K09458+K03921+K00232
Tropane, piperidine and pyridine alkaloid biosynthesis	ko00960	3	70	762	19371	TraesCS3A01G401900;TraesCS3D01G396800;TraesCS7B01G274100	K08081+K08081+K14455
AGE-RAGE signaling pathway in diabetic complications	ko04933	3	30	762	19371	TraesCS2A01G084000;TraesCS5D01G160300;TraesCS7B01G096200	K05857+K05857+K04392
Carotenoid biosynthesis	ko00906	3	102	762	19371	TraesCS2A01G280500;TraesCS2B01G297800;TraesCS2D01G279300	K09839+K09839+K09839
Non-homologous end-joining	ko03450	3	35	762	19371	TraesCS5A01G380800;TraesCS5B01G384400;TraesCS5D01G565400	K10886+K10886+K10885
Other glycan degradation	ko00511	3	71	762	19371	TraesCS3B01G434500;TraesCS5B01G309700;TraesCS7A01G320000	K12373+K01206+K17108
Sulfur metabolism	ko00920	3	129	762	19371	TraesCS6B01G170800;TraesCS6D01G128900;Triticum_aestivum_newGene_27095	K13811+K01011+K15422
Isoquinoline alkaloid biosynthesis	ko00950	3	108	762	19371	TraesCS4B01G385600;TraesCS7A01G387000;TraesCS7B01G274100	K00422+K01592+K14455
Taurine and hypotaurine metabolism	ko00430	2	54	762	19371	TraesCS5B01G023100;TraesCS5B01G023400	K10712+K10712
Phenylalanine, tyrosine and tryptophan biosynthesis	ko00400	2	158	762	19371	TraesCS4B01G197700;TraesCS7B01G274100	K05359+K14455
Histidine metabolism	ko00340	2	64	762	19371	TraesCS6B01G284600;Triticum_aestivum_newGene_25616	K00128+K01693
Fatty acid biosynthesis	ko00061	2	157	762	19371	TraesCS2D01G312000;Triticum_aestivum_newGene_46301	K09458+K03921
beta-Alanine metabolism	ko00410	2	131	762	19371	TraesCS5B01G542300;TraesCS6B01G284600	K01918+K00128
Brassinosteroid biosynthesis	ko00905	2	62	762	19371	TraesCS2A01G013400;TraesCS3D01G359100	K12640+K09591
Circadian rhythm - plant	ko04712	2	176	762	19371	TraesCS2A01G025500;TraesCS3D01G011600	K00660+K16223
Glucosinolate biosynthesis	ko00966	2	36	762	19371	TraesCS5D01G535600;TraesCS7A01G413400	K13027+K13027
Monobactam biosynthesis	ko00261	2	39	762	19371	TraesCS4D01G226800;TraesCS6B01G170800	K00215+K13811
Propanoate metabolism	ko00640	2	101	762	19371	TraesCS2A01G076600;TraesCS2D01G075200	K00016+K00016
Proteasome	ko03050	2	248	762	19371	TraesCS2D01G177600;TraesCSU01G132100	K02730+K06700
One carbon pool by folate	ko00670	2	48	762	19371	TraesCS4B01G373600;TraesCS4D01G363700	K01433+K01433
Fatty acid elongation	ko00062	2	220	762	19371	TraesCS5D01G089800;TraesCS7D01G076400	K15397+K15397
Biosynthesis of unsaturated fatty acids	ko01040	2	185	762	19371	Triticum_aestivum_newGene_46301;Triticum_aestivum_newGene_68492	K03921+K00232
Lysine degradation	ko00310	2	144	762	19371	TraesCS6B01G284600;Triticum_aestivum_newGene_67675	K00128+K11420
Sesquiterpenoid and triterpenoid biosynthesis	ko00909	2	42	762	19371	TraesCS2B01G445900;Triticum_aestivum_newGene_5322	K15793+K00511
Sulfur relay system	ko04122	1	42	762	19371	TraesCS6D01G128900	K01011
Lysine biosynthesis	ko00300	1	48	762	19371	TraesCS4D01G226800	K00215
Flavone and flavonol biosynthesis	ko00944	1	47	762	19371	Triticum_aestivum_newGene_29601	K13083
Glycosylphosphatidylinositol(GPI)-anchor biosynthesis	ko00563	1	88	762	19371	TraesCS3A01G336700	K03857
Glycosphingolipid biosynthesis - ganglio series	ko00604	1	18	762	19371	TraesCS3B01G434500	K12373
Limonene and pinene degradation	ko00903	1	21	762	19371	TraesCS6B01G284600	K00128
Biotin metabolism	ko00780	1	73	762	19371	TraesCS2D01G312000	K09458
Glycosaminoglycan degradation	ko00531	1	40	762	19371	TraesCS3B01G434500	K12373
Zeatin biosynthesis	ko00908	1	81	762	19371	TraesCS3B01G128700	K00279
Selenocompound metabolism	ko00450	1	87	762	19371	TraesCS6B01G170800	K13811

## Sheet: Down-degs-KEGG_stat
#KEGG_n	331	KEGG_N	19371
#Pathway	ko_ID	Selected_gene_in_Pathway	AllGene_in_Pathway	Selected_gene_in_All_pathways	AllGene_in_All_pathways	Gene_id	KEGG_Orthology
Starch and sucrose metabolism	ko00500	50	837	331	19371	TraesCS1A01G040600;TraesCS1B01G053600;TraesCS1B01G274500;TraesCS2A01G521900;TraesCS2A01G523300;TraesCS2B01G553100;TraesCS2D01G166600;TraesCS2D01G317900;TraesCS2D01G381300;TraesCS3A01G366400;TraesCS3B01G398000;TraesCS3D01G359300;TraesCS4A01G064900;TraesCS4A01G116700;TraesCS4A01G272900;TraesCS4A01G485400;TraesCS4A01G485900;TraesCS4A01G486000;TraesCS4B01G187700;TraesCS4D01G189100;TraesCS5B01G092700;…	K01810+K01810+K01051+K01051+K15920+K15920+K00705+K01051+K05350+K00688+K00688+K00688+K19891+K01051+K05350+K01193+K01193+K01193+K01051+K01051+K01051+K01051+K01193+K00963+K08679+K01193+K01087+K08679+K01193+K01051+K08679+K01193+K01193+K01193+K01193+K01213+K01213+K01213+K01213+K01213+K01193+K01193+K01193+K01213+K00695+K00963+K01188+K01051+K01051+K00963
Plant-pathogen interaction	ko04626	31	764	331	19371	TraesCS2A01G103600;TraesCS2B01G120900;TraesCS2D01G103400;TraesCS2D01G347500;TraesCS3D01G196000;TraesCS4A01G436700;TraesCS4B01G130300;TraesCS4B01G131100;TraesCS4D01G126100;TraesCS5A01G057100;TraesCS5A01G118200;TraesCS5A01G138300;TraesCS5A01G139700;TraesCS5A01G298500;TraesCS5B01G109300;TraesCS5B01G112900;TraesCS5B01G137600;TraesCS5B01G297700;TraesCS5D01G119100;TraesCS5D01G153400;TraesCS5D01G153800;…	K13448+K13448+K13448+K13448+K13436+K13448+K13412+K02183+K02183+K13448+K13412+K13412+K02183+K13412+K13412+K13412+K13412+K13412+K13412+K02183+K13412+K13412+K05391+K13448+K13448+K13412+K13448+K13448+K13412+K13448+K13427
Endocytosis	ko04144	24	540	331	19371	TraesCS1B01G251400;TraesCS2A01G542800;TraesCS3B01G548000;TraesCS4A01G084900;TraesCS4A01G143600;TraesCS4A01G185600;TraesCS4B01G133100;TraesCS4B01G152500;TraesCS4B01G157800;TraesCS4B01G219300;TraesCS4D01G128000;TraesCS4D01G161900;TraesCS4D01G219500;TraesCS5A01G132500;TraesCS5A01G184100;TraesCS5B01G132400;TraesCS5B01G182200;TraesCS5B01G200600;TraesCS5D01G140700;TraesCS5D01G188900;TraesCS6D01G339700;…	K12486+K12483+K12486+K19476+K00889+K00889+K00889+K00889+K00889+K19476+K00889+K00889+K19476+K00889+K07904+K00889+K07904+K01115+K00889+K07904+K03283+K07904+K07904+K07904
Phosphatidylinositol signaling system	ko04070	24	231	331	19371	TraesCS3A01G315800;TraesCS3B01G351100;TraesCS3D01G315700;TraesCS4A01G143600;TraesCS4A01G185600;TraesCS4B01G131100;TraesCS4B01G133100;TraesCS4B01G152500;TraesCS4B01G157800;TraesCS4D01G126100;TraesCS4D01G128000;TraesCS4D01G161900;TraesCS5A01G132500;TraesCS5A01G139700;TraesCS5B01G132400;TraesCS5D01G140700;TraesCS5D01G153400;TraesCS6B01G428500;TraesCS7A01G297200;TraesCS7B01G198600;TraesCS7B01G293200;…	K00901+K00901+K00901+K00889+K00889+K02183+K00889+K00889+K00889+K02183+K00889+K00889+K00889+K02183+K00889+K00889+K02183+K00901+K00901+K00901+K00901+K00901+K00901+K00901
Carbon metabolism	ko01200	22	927	331	19371	TraesCS1A01G040600;TraesCS1A01G066400;TraesCS1A01G213000;TraesCS1B01G053600;TraesCS1B01G084700;TraesCS1B01G226500;TraesCS1D01G067500;TraesCS1D01G215900;TraesCS2A01G028600;TraesCS3B01G008500;TraesCS3B01G011200;TraesCS3D01G005000;TraesCS4D01G263500;TraesCS5A01G226600;TraesCS5A01G417000;TraesCS5D01G424700;TraesCS6A01G302400;TraesCS6B01G331600;TraesCS6D01G281900;TraesCS7B01G197000;Triticum_aestivum_n…	K01810+K00382+K00873+K01810+K00382+K00873+K00382+K00873+K15919+K01595+K01595+K01595+K00640+K00850+K01807+K01807+K01834+K01834+K01834+K00051+K01595+K00873
Plant hormone signal transduction	ko04075	21	961	331	19371	TraesCS1A01G096300;TraesCS1B01G100400;TraesCS1D01G084200;TraesCS2A01G377900;TraesCS2A01G494400;TraesCS2A01G494500;TraesCS2A01G592700;TraesCS2B01G522500;TraesCS2B01G522600;TraesCS2D01G494500;TraesCS2D01G494800;TraesCS4A01G294400;TraesCS4B01G018900;TraesCS4D01G282700;TraesCS5A01G161000;TraesCS5A01G395900;TraesCS5B01G386800;TraesCS6A01G293800;TraesCS6B01G324300;TraesCS6D01G274700;TraesCS7D01G148000	K14431+K12126+K12126+K14492+K14488+K14488+K14484+K14488+K14488+K14488+K14488+K14508+K14508+K14497+K14505+K14491+K14484+K13464+K13464+K13464+K14491
Glycerolipid metabolism	ko00561	20	237	331	19371	TraesCS3A01G055500;TraesCS3A01G315800;TraesCS3B01G351100;TraesCS3D01G055400;TraesCS3D01G315700;TraesCS4A01G263200;TraesCS4B01G051600;TraesCS4D01G051900;TraesCS4D01G099600;TraesCS6A01G368700;TraesCS6B01G404700;TraesCS6B01G428500;TraesCS6D01G352200;TraesCS7A01G297200;TraesCS7B01G193800;TraesCS7B01G198600;TraesCS7B01G293200;TraesCS7D01G291600;TraesCS7D01G387000;Triticum_aestivum_newGene_16564	K06119+K00901+K00901+K06119+K00901+K01054+K01054+K01054+K03715+K03715+K03715+K00901+K03715+K00901+K14457+K00901+K00901+K00901+K00901+K00901
Phenylpropanoid biosynthesis	ko00940	20	1135	331	19371	TraesCS2B01G613400;TraesCS2D01G052200;TraesCS2D01G381300;TraesCS3D01G189900;TraesCS4A01G235800;TraesCS4A01G272900;TraesCS4B01G302100;TraesCS5B01G209800;TraesCS5D01G410600;TraesCS6A01G138000;TraesCS6B01G166200;TraesCS6B01G406000;TraesCS6B01G406300;TraesCS6D01G353300;TraesCS7A01G453000;TraesCS7B01G282100;TraesCS7D01G370900;TraesCS7D01G376600;Triticum_aestivum_newGene_18545;Triticum_aestivum_newGene…	K00430+K13066+K05350+K00430+K00430+K05350+K13065+K00083+K00430+K00430+K00430+K00083+K00083+K00083+K00430+K00083+K00430+K00083+K01188+K01904
Pentose and glucuronate interconversions	ko00040	20	228	331	19371	TraesCS1B01G274500;TraesCS2A01G521900;TraesCS2D01G317900;TraesCS4A01G116700;TraesCS4B01G187700;TraesCS4D01G189100;TraesCS5B01G092700;TraesCS5D01G099300;TraesCS6A01G050100;TraesCS6D01G333500;TraesCS7A01G404700;TraesCS7A01G404900;TraesCS7A01G405000;TraesCS7B01G304100;TraesCS7B01G304500;TraesCS7D01G397900;TraesCSU01G109000;Triticum_aestivum_newGene_42883;Triticum_aestivum_newGene_59082;Triticum_aest…	K01051+K01051+K01051+K01051+K01051+K01051+K01051+K01051+K00963+K01051+K01213+K01213+K01213+K01213+K01213+K01213+K00963+K01051+K01051+K00963
Glycerophospholipid metabolism	ko00564	18	353	331	19371	TraesCS1A01G356900;TraesCS1D01G361000;TraesCS3A01G315800;TraesCS3A01G523900;TraesCS3B01G321700;TraesCS3B01G351100;TraesCS3D01G315700;TraesCS3D01G529400;TraesCS4B01G015300;TraesCS5B01G200600;TraesCS6B01G428500;TraesCS7A01G297200;TraesCS7B01G198600;TraesCS7B01G293200;TraesCS7D01G291600;TraesCS7D01G387000;TraesCSU01G054700;Triticum_aestivum_newGene_16564	K14156+K14156+K00901+K00006+K06124+K00901+K00901+K00006+K01114+K01115+K00901+K00901+K00901+K00901+K00901+K00901+K00006+K00901
Biosynthesis of amino acids	ko01230	17	832	331	19371	TraesCS1A01G012300;TraesCS1A01G213000;TraesCS1B01G226500;TraesCS1D01G215900;TraesCS3B01G299800;TraesCS3D01G266400;TraesCS4D01G263500;TraesCS5A01G226600;TraesCS5A01G417000;TraesCS5D01G424700;TraesCS6A01G302400;TraesCS6B01G331600;TraesCS6D01G281900;TraesCS7A01G465200;TraesCS7B01G365700;TraesCS7D01G452900;Triticum_aestivum_newGene_4407	K00872+K00873+K00873+K00873+K00264+K00264+K00640+K00850+K01807+K01807+K01834+K01834+K01834+K10206+K10206+K10206+K00873
Galactose metabolism	ko00052	17	334	331	19371	TraesCS4A01G485400;TraesCS4A01G485900;TraesCS4A01G486000;TraesCS5A01G226600;TraesCS6A01G023100;TraesCS6A01G050100;TraesCS6B01G031500;TraesCS6D01G026300;TraesCS7A01G009100;TraesCS7A01G009200;TraesCS7A01G009800;TraesCS7A01G010200;TraesCS7D01G008700;TraesCS7D01G008800;TraesCS7D01G009400;TraesCSU01G109000;Triticum_aestivum_newGene_6975	K01193+K01193+K01193+K00850+K01193+K00963+K01193+K01193+K01193+K01193+K01193+K01193+K01193+K01193+K01193+K00963+K00963
Glycolysis / Gluconeogenesis	ko00010	17	532	331	19371	TraesCS1A01G040600;TraesCS1A01G066400;TraesCS1A01G213000;TraesCS1B01G053600;TraesCS1B01G084700;TraesCS1B01G226500;TraesCS1D01G067500;TraesCS1D01G215900;TraesCS2B01G104000;TraesCS2D01G086100;TraesCS5A01G226600;TraesCS6A01G302400;TraesCS6B01G331600;TraesCS6D01G281900;Triticum_aestivum_newGene_24564;Triticum_aestivum_newGene_35039;Triticum_aestivum_newGene_4407	K01810+K00382+K00873+K01810+K00382+K00873+K00382+K00873+K01568+K01568+K00850+K01834+K01834+K01834+K01568+K00016+K00873
Ubiquitin mediated proteolysis	ko04120	15	663	331	19371	TraesCS1A01G264900;TraesCS1B01G166800;TraesCS1B01G275600;TraesCS1D01G265100;TraesCS3A01G158000;TraesCS3B01G185000;TraesCS3D01G165600;TraesCS7B01G219600;Triticum_aestivum_newGene_11211;Triticum_aestivum_newGene_11397;Triticum_aestivum_newGene_20176;Triticum_aestivum_newGene_35490;Triticum_aestivum_newGene_35561;Triticum_aestivum_newGene_4792;Triticum_aestivum_newGene_7694	K03875+K03364+K03875+K03875+K04506+K04506+K04506+K09561+K03363+K06689+K03364+K03364+K03364+K10571+K06689
Nitrogen metabolism	ko00910	14	192	331	19371	TraesCS1A01G443500;TraesCS1B01G478000;TraesCS3B01G299800;TraesCS3D01G266400;TraesCS4A01G196600;TraesCS4D01G116400;TraesCS5A01G236600;TraesCS5B01G235100;TraesCS5D01G243600;TraesCS6A01G326200;TraesCS7A01G454300;TraesCS7B01G354800;TraesCS7B01G354900;TraesCS7D01G443400	K01674+K01674+K00264+K00264+K01674+K01674+K01674+K01674+K01674+K10534+K01673+K01673+K01673+K01673
Pyruvate metabolism	ko00620	13	325	331	19371	TraesCS1A01G066400;TraesCS1A01G213000;TraesCS1B01G084700;TraesCS1B01G226500;TraesCS1D01G067500;TraesCS1D01G215900;TraesCS3B01G008500;TraesCS3B01G011200;TraesCS3D01G005000;TraesCS7B01G197000;Triticum_aestivum_newGene_35039;Triticum_aestivum_newGene_43200;Triticum_aestivum_newGene_4407	K00382+K00873+K00382+K00873+K00382+K00873+K01595+K01595+K01595+K00051+K00016+K01595+K00873
Inositol phosphate metabolism	ko00562	13	187	331	19371	TraesCS4A01G143600;TraesCS4A01G185600;TraesCS4A01G246500;TraesCS4B01G015300;TraesCS4B01G068300;TraesCS4B01G133100;TraesCS4B01G152500;TraesCS4B01G157800;TraesCS4D01G128000;TraesCS4D01G161900;TraesCS5A01G132500;TraesCS5B01G132400;TraesCS5D01G140700	K00889+K00889+K19517+K01114+K19517+K00889+K00889+K00889+K00889+K00889+K00889+K00889+K00889
Amino sugar and nucleotide sugar metabolism	ko00520	11	510	331	19371	TraesCS1A01G040600;TraesCS1B01G053600;TraesCS2A01G523300;TraesCS2B01G553100;TraesCS6A01G050100;TraesCS6A01G257500;TraesCS6A01G353200;TraesCS6B01G385900;TraesCS6D01G335600;TraesCSU01G109000;Triticum_aestivum_newGene_6975	K01810+K01810+K15920+K15920+K00963+K12451+K08679+K08679+K08679+K00963+K00963
SNARE interactions in vesicular transport	ko04130	9	146	331	19371	TraesCS2A01G213400;TraesCS2B01G238200;TraesCS3A01G252300;TraesCS3B01G283800;TraesCS3D01G252800;TraesCS7A01G368400;TraesCS7B01G260100;TraesCS7D01G354500;Triticum_aestivum_newGene_54155	K08486+K08486+K08493+K08493+K08493+K08486+K08486+K08486+K08517
Glycine, serine and threonine metabolism	ko00260	8	232	331	19371	TraesCS1A01G012300;TraesCS1A01G066400;TraesCS1B01G084700;TraesCS1D01G067500;TraesCS2A01G028600;TraesCS6A01G302400;TraesCS6B01G331600;TraesCS6D01G281900	K00872+K00382+K00382+K00382+K15919+K01834+K01834+K01834
Zeatin biosynthesis	ko00908	8	81	331	19371	TraesCS1A01G376300;TraesCS1B01G176000;TraesCS1B01G396700;TraesCS1D01G157000;TraesCS2D01G130300;TraesCS3B01G525300;TraesCS7A01G536900;TraesCS7B01G455000	K10760+K00279+K10760+K00279+K13495+K00279+K00279+K00279
mRNA surveillance pathway	ko03015	7	399	331	19371	TraesCS1A01G095500;TraesCS1B01G128100;TraesCS1D01G104400;TraesCS3B01G226800;TraesCS6B01G449000;TraesCS6D01G388000;Triticum_aestivum_newGene_67794	K06269+K06269+K06269+K06269+K06269+K06269+K12812
Carbon fixation in photosynthetic organisms	ko00710	7	262	331	19371	TraesCS3B01G008500;TraesCS3B01G011200;TraesCS3D01G005000;TraesCS5A01G417000;TraesCS5D01G424700;TraesCS7B01G197000;Triticum_aestivum_newGene_43200	K01595+K01595+K01595+K01807+K01807+K00051+K01595
Protein processing in endoplasmic reticulum	ko04141	6	889	331	19371	TraesCS1A01G190300;TraesCS3D01G301500;TraesCS6D01G339700;TraesCS7B01G219600;Triticum_aestivum_newGene_11397;Triticum_aestivum_newGene_7694	K13525+K10666+K03283+K09561+K06689+K06689
Arginine and proline metabolism	ko00330	6	213	331	19371	TraesCS3D01G251100;TraesCS7A01G156500;TraesCS7B01G060700;TraesCS7D01G156800;TraesCS7D01G156900;Triticum_aestivum_newGene_19951	K12259+K01581+K01581+K01581+K01581+K13427
Purine metabolism	ko00230	6	630	331	19371	TraesCS1A01G213000;TraesCS1B01G226500;TraesCS1D01G215900;TraesCS7A01G322100;TraesCS7B01G223000;Triticum_aestivum_newGene_4407	K00873+K00873+K00873+K00939+K00939+K00873
RNA transport	ko03013	6	634	331	19371	TraesCS2D01G269500;TraesCS4D01G143800;TraesCS5D01G098000;TraesCS6A01G377800;Triticum_aestivum_newGene_67794;Triticum_aestivum_newGene_70497	K03537+K01164+K14310+K13130+K12812+K14310
Pentose phosphate pathway	ko00030	5	205	331	19371	TraesCS1A01G040600;TraesCS1B01G053600;TraesCS5A01G226600;TraesCS5A01G417000;TraesCS5D01G424700	K01810+K01810+K00850+K01807+K01807
Spliceosome	ko03040	5	761	331	19371	TraesCS1A01G415500;TraesCS2B01G589500;TraesCS6D01G339700;Triticum_aestivum_newGene_47426;Triticum_aestivum_newGene_67794	K12858+K12859+K03283+K12863+K12812
Ascorbate and aldarate metabolism	ko00053	5	136	331	19371	TraesCS4A01G201200;TraesCS4D01G102200;TraesCS6D01G253900;TraesCS7B01G175300;TraesCS7B01G265200	K14190+K14190+K08232+K08232+K00423
Oxidative phosphorylation	ko00190	5	846	331	19371	TraesCS1A01G273500;TraesCS1B01G355800;TraesCS1D01G357100;TraesCSU01G245600;Triticum_aestivum_newGene_37031	K01507+K01507+K03940+K05576+K02145
Propanoate metabolism	ko00640	4	101	331	19371	TraesCS1A01G066400;TraesCS1B01G084700;TraesCS1D01G067500;Triticum_aestivum_newGene_35039	K00382+K00382+K00382+K00016
Glutathione metabolism	ko00480	4	458	331	19371	TraesCS7A01G156500;TraesCS7B01G060700;TraesCS7D01G156800;TraesCS7D01G156900	K01581+K01581+K01581+K01581
Cysteine and methionine metabolism	ko00270	4	365	331	19371	TraesCS1A01G181000;TraesCS4D01G263500;TraesCS7D01G537800;Triticum_aestivum_newGene_35039	K01761+K00640+K00558+K00016
Glyoxylate and dicarboxylate metabolism	ko00630	4	246	331	19371	TraesCS1A01G066400;TraesCS1B01G084700;TraesCS1D01G067500;TraesCS2A01G028600	K00382+K00382+K00382+K15919
Fructose and mannose metabolism	ko00051	4	259	331	19371	TraesCS5A01G226600;TraesCS6B01G363800;TraesCS6B01G363900;TraesCS6D01G312500	K00850+K19355+K19355+K19355
Ribosome	ko03010	4	1265	331	19371	TraesCS1B01G254000;TraesCS1D01G242500;Triticum_aestivum_newGene_41973;Triticum_aestivum_newGene_44265	K02863+K02863+K02863+K02973
Tyrosine metabolism	ko00350	3	190	331	19371	TraesCS2B01G491000;TraesCS2B01G491100;TraesCS2D01G468200	K00422+K00422+K00422
Citrate cycle (TCA cycle)	ko00020	3	180	331	19371	TraesCS1A01G066400;TraesCS1B01G084700;TraesCS1D01G067500	K00382+K00382+K00382
Carotenoid biosynthesis	ko00906	3	102	331	19371	TraesCS4B01G318000;TraesCS4D01G314400;TraesCS5B01G017900	K15746+K15746+K02291
Nucleotide excision repair	ko03420	3	246	331	19371	TraesCSU01G140700;Triticum_aestivum_newGene_41689;Triticum_aestivum_newGene_48381	K10756+K07466+K07466
DNA replication	ko03030	3	229	331	19371	TraesCSU01G140700;Triticum_aestivum_newGene_41689;Triticum_aestivum_newGene_48381	K10756+K07466+K07466
Isoquinoline alkaloid biosynthesis	ko00950	3	108	331	19371	TraesCS2B01G491000;TraesCS2B01G491100;TraesCS2D01G468200	K00422+K00422+K00422
Cyanoamino acid metabolism	ko00460	3	303	331	19371	TraesCS2D01G381300;TraesCS4A01G272900;Triticum_aestivum_newGene_18545	K05350+K05350+K01188
Lysine biosynthesis	ko00300	3	48	331	19371	TraesCS7A01G465200;TraesCS7B01G365700;TraesCS7D01G452900	K10206+K10206+K10206
Taurine and hypotaurine metabolism	ko00430	3	54	331	19371	Triticum_aestivum_newGene_13596;Triticum_aestivum_newGene_13602;Triticum_aestivum_newGene_13609	K10712+K10712+K10712
Sulfur metabolism	ko00920	3	129	331	19371	TraesCS2B01G616800;TraesCS2D01G566900;TraesCS4D01G263500	K08738+K08738+K00640
Diterpenoid biosynthesis	ko00904	3	123	331	19371	TraesCS1B01G420700;TraesCS2B01G445300;TraesCS5D01G566200	K04125+K04122+K05282
Ribosome biogenesis in eukaryotes	ko03008	3	378	331	19371	TraesCS2D01G269500;TraesCS4D01G143800;TraesCS5A01G049800	K03537+K01164+K14552
Mismatch repair	ko03430	3	184	331	19371	TraesCSU01G140700;Triticum_aestivum_newGene_41689;Triticum_aestivum_newGene_48381	K10756+K07466+K07466
Valine, leucine and isoleucine degradation	ko00280	3	136	331	19371	TraesCS1A01G066400;TraesCS1B01G084700;TraesCS1D01G067500	K00382+K00382+K00382
N-Glycan biosynthesis	ko00510	2	150	331	19371	TraesCS2A01G403000;TraesCS4D01G196500	K07252+K07252
RNA degradation	ko03018	2	431	331	19371	TraesCS5A01G226600;Triticum_aestivum_newGene_64325	K00850+K04077
Ether lipid metabolism	ko00565	2	101	331	19371	TraesCS4B01G015300;TraesCS5B01G200600	K01114+K01115
alpha-Linolenic acid metabolism	ko00592	2	238	331	19371	TraesCS3A01G411500;TraesCS3B01G421500	K08241+K08241
Porphyrin and chlorophyll metabolism	ko00860	2	166	331	19371	TraesCS4B01G302400;TraesCS6D01G135300	K01719+K08099
Fatty acid elongation	ko00062	2	220	331	19371	TraesCS1D01G420900;TraesCS7D01G089200	K15397+K15397
Circadian rhythm - plant	ko04712	2	176	331	19371	TraesCS1B01G100400;TraesCS1D01G084200	K12126+K12126
Homologous recombination	ko03440	2	241	331	19371	Triticum_aestivum_newGene_41689;Triticum_aestivum_newGene_48381	K07466+K07466
Phagosome	ko04145	2	319	331	19371	Triticum_aestivum_newGene_37031;Triticum_aestivum_newGene_54155	K02145+K08517
Alanine, aspartate and glutamate metabolism	ko00250	2	200	331	19371	TraesCS3B01G299800;TraesCS3D01G266400	K00264+K00264
Aminoacyl-tRNA biosynthesis	ko00970	1	292	331	19371	Triticum_aestivum_newGene_43332	K01873
Riboflavin metabolism	ko00740	1	29	331	19371	TraesCS5A01G524300	K11752
Nicotinate and nicotinamide metabolism	ko00760	1	59	331	19371	Triticum_aestivum_newGene_43752	K00763
Stilbenoid, diarylheptanoid and gingerol biosynthesis	ko00945	1	111	331	19371	TraesCS4B01G302100	K13065
Selenocompound metabolism	ko00450	1	87	331	19371	TraesCS1A01G181000	K01761
Regulation of autophagy	ko04140	1	115	331	19371	TraesCS3A01G135500	K07198
Ubiquinone and other terpenoid-quinone biosynthesis	ko00130	1	173	331	19371	Triticum_aestivum_newGene_48779	K01904
Glycosylphosphatidylinositol(GPI)-anchor biosynthesis	ko00563	1	88	331	19371	TraesCS5D01G534500	K05293
Brassinosteroid biosynthesis	ko00905	1	62	331	19371	TraesCS6D01G166900	K15639
Pyrimidine metabolism	ko00240	1	516	331	19371	Triticum_aestivum_newGene_67721	K01520
Peroxisome	ko04146	1	304	331	19371	Triticum_aestivum_newGene_36023	K13337
Flavonoid biosynthesis	ko00941	1	241	331	19371	TraesCS4B01G302100	K13065
Steroid biosynthesis	ko00100	1	179	331	19371	TraesCS5A01G503700	K08242
Linoleic acid metabolism	ko00591	1	75	331	19371	TraesCS6B01G395700	K15718
Arginine biosynthesis	ko00220	1	133	331	19371	Triticum_aestivum_newGene_19951	K13427
Phenylalanine metabolism	ko00360	1	192	331	19371	Triticum_aestivum_newGene_48779	K01904
Cutin, suberine and wax biosynthesis	ko00073	1	130	331	19371	TraesCS7D01G206400	K17991
Photosynthesis	ko00195	1	475	331	19371	TraesCS5A01G523000	K02634
ABC transporters	ko02010	1	98	331	19371	TraesCS2B01G550700	K05658
Base excision repair	ko03410	1	144	331	19371	TraesCS5D01G231700	K01246
beta-Alanine metabolism	ko00410	1	131	331	19371	TraesCS3D01G251100	K12259

## Sheet: UP-degs-KEGG_enrich
#Kegg_pathway	ko_id	Cluster_frequency	Genome_frequency	P-value	Corrected_P-value	rich_factor
Glycosphingolipid biosynthesis - globo series	ko00603	7 out of 762 0.918635170603675%	38 out of 19371 0.196169531774302%	0.000616247	0.0671709	4.68286
DNA replication	ko03030	35 out of 762 4.59317585301837%	229 out of 19371 1.18217954674513%	5.7131e-12	6.22728e-10	3.88535
Mismatch repair	ko03430	26 out of 762 3.41207349081365%	184 out of 19371 0.949873522275567%	1.58619e-08	1.72894e-06	3.59213
Protein processing in endoplasmic reticulum	ko04141	117 out of 762 15.3543307086614%	889 out of 19371 4.5893345722988%	8.55016e-12	9.31968e-10	3.34566
AGE-RAGE signaling pathway in diabetic complications	ko04933	3 out of 762 0.393700787401575%	30 out of 19371 0.154870682979712%	0.112496	1	2.54213
Monoterpenoid biosynthesis	ko00902	5 out of 762 0.656167979002625%	51 out of 19371 0.26328016106551%	0.0493493	1	2.49228
Nucleotide excision repair	ko03420	24 out of 762 3.1496062992126%	246 out of 19371 1.26993960043364%	4.19826e-05	0.0045761	2.48012
Galactose metabolism	ko00052	29 out of 762 3.80577427821522%	334 out of 19371 1.72422693717413%	6.08191e-05	0.00662928	2.20724
Non-homologous end-joining	ko03450	3 out of 762 0.393700787401575%	35 out of 19371 0.180682463476331%	0.157716	1	2.17897
Base excision repair	ko03410	12 out of 762 1.5748031496063%	144 out of 19371 0.743379278302617%	0.011506	1	2.11844
Homologous recombination	ko03440	20 out of 762 2.6246719160105%	241 out of 19371 1.24412781993702%	0.0014078	0.15345	2.10965
Protein export	ko03060	20 out of 762 2.6246719160105%	254 out of 19371 1.31123844922823%	0.00261489	0.285023	2.00167
Sphingolipid metabolism	ko00600	8 out of 762 1.0498687664042%	118 out of 19371 0.6091580197202%	0.0938631	1	1.72348
Ascorbate and aldarate metabolism	ko00053	9 out of 762 1.18110236220472%	136 out of 19371 0.702080429508028%	0.08839	1	1.68229
Cutin, suberine and wax biosynthesis	ko00073	8 out of 762 1.0498687664042%	130 out of 19371 0.671106292912085%	0.140654	1	1.56439
ABC transporters	ko02010	6 out of 762 0.78740157480315%	98 out of 19371 0.505910897733726%	0.188685	1	1.5564
Endocytosis	ko04144	33 out of 762 4.33070866141732%	540 out of 19371 2.78767229363481%	0.0085168	0.928331	1.55352
Starch and sucrose metabolism	ko00500	51 out of 762 6.69291338582677%	837 out of 19371 4.32089205513396%	0.00133319	0.145317	1.54897
RNA polymerase	ko03020	12 out of 762 1.5748031496063%	201 out of 19371 1.03763357596407%	0.0998557	1	1.51769
Pentose and glucuronate interconversions	ko00040	13 out of 762 1.70603674540682%	228 out of 19371 1.17701719064581%	0.116278	1	1.44946
Glycosphingolipid biosynthesis - ganglio series	ko00604	1 out of 762 0.131233595800525%	18 out of 19371 0.0929224097878272%	0.514558	1	1.41229
Glucosinolate biosynthesis	ko00966	2 out of 762 0.26246719160105%	36 out of 19371 0.185844819575654%	0.416708	1	1.41229
Fructose and mannose metabolism	ko00051	14 out of 762 1.83727034120735%	259 out of 19371 1.33705022972485%	0.143804	1	1.37412
Cyanoamino acid metabolism	ko00460	16 out of 762 2.0997375328084%	303 out of 19371 1.56419389809509%	0.143638	1	1.34238
Pantothenate and CoA biosynthesis	ko00770	5 out of 762 0.656167979002625%	95 out of 19371 0.490423829435754%	0.318733	1	1.33796
Glutathione metabolism	ko00480	24 out of 762 3.1496062992126%	458 out of 19371 2.36435909349027%	0.0948331	1	1.33212
Monobactam biosynthesis	ko00261	2 out of 762 0.26246719160105%	39 out of 19371 0.201331887873626%	0.457249	1	1.30365
Pyrimidine metabolism	ko00240	26 out of 762 3.41207349081365%	516 out of 19371 2.66377574725105%	0.118393	1	1.28092
Fatty acid degradation	ko00071	8 out of 762 1.0498687664042%	161 out of 19371 0.831139331991121%	0.300637	1	1.26317
Cysteine and methionine metabolism	ko00270	18 out of 762 2.36220472440945%	365 out of 19371 1.88425997625316%	0.193213	1	1.25365
Basal transcription factors	ko03022	10 out of 762 1.31233595800525%	208 out of 19371 1.07377006865934%	0.3035	1	1.22218
Sesquiterpenoid and triterpenoid biosynthesis	ko00909	2 out of 762 0.26246719160105%	42 out of 19371 0.216818956171597%	0.496111	1	1.21054
Limonene and pinene degradation	ko00903	1 out of 762 0.131233595800525%	21 out of 19371 0.108409478085798%	0.569674	1	1.21054
Tyrosine metabolism	ko00350	9 out of 762 1.18110236220472%	190 out of 19371 0.980847658871509%	0.332602	1	1.20416
Nitrogen metabolism	ko00910	9 out of 762 1.18110236220472%	192 out of 19371 0.991172371070156%	0.343676	1	1.19162
RNA degradation	ko03018	20 out of 762 2.6246719160105%	431 out of 19371 2.22497547880853%	0.254677	1	1.17964
Flavonoid biosynthesis	ko00941	11 out of 762 1.44356955380577%	241 out of 19371 1.24412781993702%	0.350474	1	1.16031
Terpenoid backbone biosynthesis	ko00900	9 out of 762 1.18110236220472%	199 out of 19371 1.02730886376542%	0.382811	1	1.14971
Glycolysis / Gluconeogenesis	ko00010	24 out of 762 3.1496062992126%	532 out of 19371 2.74637344484023%	0.273088	1	1.14682
Ribosome biogenesis in eukaryotes	ko03008	17 out of 762 2.23097112860892%	378 out of 19371 1.95137060554437%	0.32008	1	1.14328
Purine metabolism	ko00230	28 out of 762 3.6745406824147%	630 out of 19371 3.25228434257395%	0.278763	1	1.12983
Amino sugar and nucleotide sugar metabolism	ko00520	22 out of 762 2.88713910761155%	510 out of 19371 2.6328016106551%	0.358788	1	1.0966
Glycine, serine and threonine metabolism	ko00260	10 out of 762 1.31233595800525%	232 out of 19371 1.19766661504311%	0.429605	1	1.09574
Tropane, piperidine and pyridine alkaloid biosynthesis	ko00960	3 out of 762 0.393700787401575%	70 out of 19371 0.361364926952661%	0.523386	1	1.08948
Inositol phosphate metabolism	ko00562	8 out of 762 1.0498687664042%	187 out of 19371 0.965360590573538%	0.45546	1	1.08754
Other glycan degradation	ko00511	3 out of 762 0.393700787401575%	71 out of 19371 0.366527283051985%	0.533002	1	1.07414
One carbon pool by folate	ko00670	2 out of 762 0.26246719160105%	48 out of 19371 0.247793092767539%	0.568285	1	1.05922
Diterpenoid biosynthesis	ko00904	5 out of 762 0.656167979002625%	123 out of 19371 0.634969800216819%	0.534238	1	1.03338
Plant hormone signal transduction	ko04075	39 out of 762 5.11811023622047%	961 out of 19371 4.96102421145011%	0.443601	1	1.03166
Plant-pathogen interaction	ko04626	31 out of 762 4.06824146981627%	764 out of 19371 3.94404005988333%	0.455622	1	1.03149
Ubiquinone and other terpenoid-quinone biosynthesis	ko00130	7 out of 762 0.918635170603675%	173 out of 19371 0.893087605183006%	0.523908	1	1.02861
Alanine, aspartate and glutamate metabolism	ko00250	8 out of 762 1.0498687664042%	200 out of 19371 1.03247121986475%	0.531481	1	1.01685
Ether lipid metabolism	ko00565	4 out of 762 0.5249343832021%	101 out of 19371 0.521397966031697%	0.565584	1	1.00678
Phosphatidylinositol signaling system	ko04070	9 out of 762 1.18110236220472%	231 out of 19371 1.19250425894378%	0.559428	1	0.990439
Phenylpropanoid biosynthesis	ko00940	44 out of 762 5.7742782152231%	1135 out of 19371 5.85927417273243%	0.563483	1	0.985494
Glycerolipid metabolism	ko00561	9 out of 762 1.18110236220472%	237 out of 19371 1.22347839553972%	0.590456	1	0.965364
RNA transport	ko03013	24 out of 762 3.1496062992126%	634 out of 19371 3.27293376697125%	0.606997	1	0.962319
alpha-Linolenic acid metabolism	ko00592	9 out of 762 1.18110236220472%	238 out of 19371 1.22864075163905%	0.595528	1	0.961308
Tryptophan metabolism	ko00380	8 out of 762 1.0498687664042%	212 out of 19371 1.09441949305663%	0.597896	1	0.959293
Phagosome	ko04145	12 out of 762 1.5748031496063%	319 out of 19371 1.64679159568427%	0.604253	1	0.956286
Arginine biosynthesis	ko00220	5 out of 762 0.656167979002625%	133 out of 19371 0.686593361210056%	0.604035	1	0.955686
Taurine and hypotaurine metabolism	ko00430	2 out of 762 0.26246719160105%	54 out of 19371 0.278767229363481%	0.632687	1	0.941528
Glyoxylate and dicarboxylate metabolism	ko00630	9 out of 762 1.18110236220472%	246 out of 19371 1.26993960043364%	0.63497	1	0.930046
Stilbenoid, diarylheptanoid and gingerol biosynthesis	ko00945	4 out of 762 0.5249343832021%	111 out of 19371 0.573021527024934%	0.640189	1	0.916081
SNARE interactions in vesicular transport	ko04130	5 out of 762 0.656167979002625%	146 out of 19371 0.753703990501265%	0.685143	1	0.870591
Steroid biosynthesis	ko00100	6 out of 762 0.78740157480315%	179 out of 19371 0.924061741778948%	0.710905	1	0.852109
Ubiquitin mediated proteolysis	ko04120	22 out of 762 2.88713910761155%	663 out of 19371 3.42264209385163%	0.823337	1	0.843541
Brassinosteroid biosynthesis	ko00905	2 out of 762 0.26246719160105%	62 out of 19371 0.320066078158071%	0.706547	1	0.820041
Histidine metabolism	ko00340	2 out of 762 0.26246719160105%	64 out of 19371 0.330390790356719%	0.722959	1	0.794414
Phenylalanine metabolism	ko00360	6 out of 762 0.78740157480315%	192 out of 19371 0.991172371070156%	0.771133	1	0.794414
Valine, leucine and isoleucine degradation	ko00280	4 out of 762 0.5249343832021%	136 out of 19371 0.702080429508028%	0.787387	1	0.747684
Carotenoid biosynthesis	ko00906	3 out of 762 0.393700787401575%	102 out of 19371 0.526560322131021%	0.770332	1	0.747684
Pentose phosphate pathway	ko00030	6 out of 762 0.78740157480315%	205 out of 19371 1.05828300036137%	0.821483	1	0.744037
Ribosome	ko03010	37 out of 762 4.85564304461942%	1265 out of 19371 6.53038046564452%	0.979907	1	0.743547
Spliceosome	ko03040	22 out of 762 2.88713910761155%	761 out of 19371 3.92855299158536%	0.951069	1	0.734912
Arginine and proline metabolism	ko00330	6 out of 762 0.78740157480315%	213 out of 19371 1.09958184915595%	0.847839	1	0.716092
Carbon metabolism	ko01200	26 out of 762 3.41207349081365%	927 out of 19371 4.7855041040731%	0.975749	1	0.713002
Isoquinoline alkaloid biosynthesis	ko00950	3 out of 762 0.393700787401575%	108 out of 19371 0.557534458726963%	0.802672	1	0.706146
Aminoacyl-tRNA biosynthesis	ko00970	8 out of 762 1.0498687664042%	292 out of 19371 1.50740798100253%	0.892124	1	0.696473
Glycosaminoglycan degradation	ko00531	1 out of 762 0.131233595800525%	40 out of 19371 0.206494243972949%	0.799496	1	0.635531
Porphyrin and chlorophyll metabolism	ko00860	4 out of 762 0.5249343832021%	166 out of 19371 0.856951112487739%	0.895942	1	0.61256
Sulfur relay system	ko04122	1 out of 762 0.131233595800525%	42 out of 19371 0.216818956171597%	0.814992	1	0.605268
Sulfur metabolism	ko00920	3 out of 762 0.393700787401575%	129 out of 19371 0.665943936812761%	0.887204	1	0.591192
Peroxisome	ko04146	7 out of 762 0.918635170603675%	304 out of 19371 1.56935625419441%	0.957322	1	0.585358
Carbon fixation in photosynthetic organisms	ko00710	6 out of 762 0.78740157480315%	262 out of 19371 1.35253729802282%	0.948157	1	0.582166
Glycerophospholipid metabolism	ko00564	8 out of 762 1.0498687664042%	353 out of 19371 1.82231170306128%	0.969918	1	0.576119
Citrate cycle (TCA cycle)	ko00020	4 out of 762 0.5249343832021%	180 out of 19371 0.929224097878272%	0.927275	1	0.564917
Flavone and flavonol biosynthesis	ko00944	1 out of 762 0.131233595800525%	47 out of 19371 0.242630736668215%	0.848699	1	0.540878
Lysine biosynthesis	ko00300	1 out of 762 0.131233595800525%	48 out of 19371 0.247793092767539%	0.854665	1	0.52961
Biosynthesis of amino acids	ko01230	17 out of 762 2.23097112860892%	832 out of 19371 4.29508027463734%	0.999359	1	0.519425
Propanoate metabolism	ko00640	2 out of 762 0.26246719160105%	101 out of 19371 0.521397966031697%	0.911385	1	0.503391
2-Oxocarboxylic acid metabolism	ko01210	4 out of 762 0.5249343832021%	204 out of 19371 1.05312064426204%	0.961814	1	0.498456
Pyruvate metabolism	ko00620	6 out of 762 0.78740157480315%	325 out of 19371 1.67776573228021%	0.989335	1	0.469316
Oxidative phosphorylation	ko00190	15 out of 762 1.96850393700787%	846 out of 19371 4.36735326002788%	0.999917	1	0.450732
beta-Alanine metabolism	ko00410	2 out of 762 0.26246719160105%	131 out of 19371 0.676268649011409%	0.967247	1	0.388111
mRNA surveillance pathway	ko03015	6 out of 762 0.78740157480315%	399 out of 19371 2.05978008363017%	0.998642	1	0.382275
Lysine degradation	ko00310	2 out of 762 0.26246719160105%	144 out of 19371 0.743379278302617%	0.979	1	0.353073
Biotin metabolism	ko00780	1 out of 762 0.131233595800525%	73 out of 19371 0.376851995250632%	0.946879	1	0.348236
Fatty acid biosynthesis	ko00061	2 out of 762 0.26246719160105%	157 out of 19371 0.810489907593826%	0.986621	1	0.323838
Phenylalanine, tyrosine and tryptophan biosynthesis	ko00400	2 out of 762 0.26246719160105%	158 out of 19371 0.81565226369315%	0.98708	1	0.321788
Zeatin biosynthesis	ko00908	1 out of 762 0.131233595800525%	81 out of 19371 0.418150844045222%	0.961517	1	0.313843
Selenocompound metabolism	ko00450	1 out of 762 0.131233595800525%	87 out of 19371 0.449124980641165%	0.969784	1	0.292198
Circadian rhythm - plant	ko04712	2 out of 762 0.26246719160105%	176 out of 19371 0.908574673480977%	0.993144	1	0.288878
Glycosylphosphatidylinositol(GPI)-anchor biosynthesis	ko00563	1 out of 762 0.131233595800525%	88 out of 19371 0.454287336740488%	0.970978	1	0.288878
Biosynthesis of unsaturated fatty acids	ko01040	2 out of 762 0.26246719160105%	185 out of 19371 0.95503587837489%	0.995023	1	0.274824
Photosynthesis	ko00195	5 out of 762 0.656167979002625%	475 out of 19371 2.45211914717877%	0.999967	1	0.267592
Fatty acid metabolism	ko01212	3 out of 762 0.393700787401575%	319 out of 19371 1.64679159568427%	0.999747	1	0.239071
Fatty acid elongation	ko00062	2 out of 762 0.26246719160105%	220 out of 19371 1.13571834185122%	0.998593	1	0.231102
Proteasome	ko03050	2 out of 762 0.26246719160105%	248 out of 19371 1.28026431263229%	0.999496	1	0.20501

## Sheet: Down-degs-KEGG_enrich
#Kegg_pathway	ko_id	Cluster_frequency	Genome_frequency	P-value	Corrected_P-value	rich_factor
Phosphatidylinositol signaling system	ko04070	24 out of 331 7.25075528700906%	231 out of 19371 1.19250425894378%	3.33333e-12	2.73333e-10	6.08028
Zeatin biosynthesis	ko00908	8 out of 331 2.41691842900302%	81 out of 19371 0.418150844045222%	7.26812e-05	0.00595986	5.78002
Pentose and glucuronate interconversions	ko00040	20 out of 331 6.04229607250755%	228 out of 19371 1.17701719064581%	2.56333e-09	2.10193e-07	5.13357
Glycerolipid metabolism	ko00561	20 out of 331 6.04229607250755%	237 out of 19371 1.22347839553972%	5.00188e-09	4.10154e-07	4.93862
Nitrogen metabolism	ko00910	14 out of 331 4.22960725075529%	192 out of 19371 0.991172371070156%	5.83252e-06	0.000478267	4.26728
Inositol phosphate metabolism	ko00562	13 out of 331 3.92749244712991%	187 out of 19371 0.965360590573538%	2.0885e-05	0.00171257	4.06842
Lysine biosynthesis	ko00300	3 out of 331 0.906344410876133%	48 out of 19371 0.247793092767539%	0.0486409	1	3.65767
SNARE interactions in vesicular transport	ko04130	9 out of 331 2.7190332326284%	146 out of 19371 0.753703990501265%	0.000928697	0.0761531	3.60756
Starch and sucrose metabolism	ko00500	50 out of 331 15.1057401812689%	837 out of 19371 4.32089205513396%	0	0	3.49598
Taurine and hypotaurine metabolism	ko00430	3 out of 331 0.906344410876133%	54 out of 19371 0.278767229363481%	0.0648135	1	3.25126
Glycerophospholipid metabolism	ko00564	18 out of 331 5.4380664652568%	353 out of 19371 1.82231170306128%	4.01999e-05	0.00329639	2.98416
Galactose metabolism	ko00052	17 out of 331 5.13595166163142%	334 out of 19371 1.72422693717413%	6.71713e-05	0.00550805	2.9787
Endocytosis	ko04144	24 out of 331 7.25075528700906%	540 out of 19371 2.78767229363481%	2.10181e-05	0.00172348	2.60101
Plant-pathogen interaction	ko04626	31 out of 331 9.36555891238671%	764 out of 19371 3.94404005988333%	8.16262e-06	0.000669335	2.37461
Pyruvate metabolism	ko00620	13 out of 331 3.92749244712991%	325 out of 19371 1.67776573228021%	0.00408753	0.335177	2.34091
Propanoate metabolism	ko00640	4 out of 331 1.20845921450151%	101 out of 19371 0.521397966031697%	0.094895	1	2.31773
Ascorbate and aldarate metabolism	ko00053	5 out of 331 1.51057401812689%	136 out of 19371 0.702080429508028%	0.0841397	1	2.15157
Glycine, serine and threonine metabolism	ko00260	8 out of 331 2.41691842900302%	232 out of 19371 1.19766661504311%	0.0464797	1	2.01802
Riboflavin metabolism	ko00740	1 out of 331 0.302114803625378%	29 out of 19371 0.149708326880388%	0.39358	1	2.01802
Glycolysis / Gluconeogenesis	ko00010	17 out of 331 5.13595166163142%	532 out of 19371 2.74637344484023%	0.0103924	0.85218	1.87008
Carotenoid biosynthesis	ko00906	3 out of 331 0.906344410876133%	102 out of 19371 0.526560322131021%	0.253352	1	1.72125
Arginine and proline metabolism	ko00330	6 out of 331 1.81268882175227%	213 out of 19371 1.09958184915595%	0.158661	1	1.64853
Isoquinoline alkaloid biosynthesis	ko00950	3 out of 331 0.906344410876133%	108 out of 19371 0.557534458726963%	0.281077	1	1.62563
Carbon fixation in photosynthetic organisms	ko00710	7 out of 331 2.11480362537764%	262 out of 19371 1.35253729802282%	0.162984	1	1.56358
Diterpenoid biosynthesis	ko00904	3 out of 331 0.906344410876133%	123 out of 19371 0.634969800216819%	0.351145	1	1.42738
Pentose phosphate pathway	ko00030	5 out of 331 1.51057401812689%	205 out of 19371 1.05828300036137%	0.273765	1	1.42738
Carbon metabolism	ko01200	22 out of 331 6.64652567975831%	927 out of 19371 4.7855041040731%	0.07572	1	1.38889
Sulfur metabolism	ko00920	3 out of 331 0.906344410876133%	129 out of 19371 0.665943936812761%	0.379069	1	1.36099
Ubiquitin mediated proteolysis	ko04120	15 out of 331 4.53172205438066%	663 out of 19371 3.42264209385163%	0.165386	1	1.32404
Valine, leucine and isoleucine degradation	ko00280	3 out of 331 0.906344410876133%	136 out of 19371 0.702080429508028%	0.411308	1	1.29094
Plant hormone signal transduction	ko04075	21 out of 331 6.34441087613293%	961 out of 19371 4.96102421145011%	0.149013	1	1.27885
Amino sugar and nucleotide sugar metabolism	ko00520	11 out of 331 3.32326283987915%	510 out of 19371 2.6328016106551%	0.257463	1	1.26225
Biosynthesis of amino acids	ko01230	17 out of 331 5.13595166163142%	832 out of 19371 4.29508027463734%	0.258157	1	1.19578
Ether lipid metabolism	ko00565	2 out of 331 0.604229607250755%	101 out of 19371 0.521397966031697%	0.517229	1	1.15886
Phenylpropanoid biosynthesis	ko00940	20 out of 331 6.04229607250755%	1135 out of 19371 5.85927417273243%	0.476604	1	1.03124
mRNA surveillance pathway	ko03015	7 out of 331 2.11480362537764%	399 out of 19371 2.05978008363017%	0.525175	1	1.02671
Nicotinate and nicotinamide metabolism	ko00760	1 out of 331 0.302114803625378%	59 out of 19371 0.3045790098601%	0.638831	1	0.991909
Citrate cycle (TCA cycle)	ko00020	3 out of 331 0.906344410876133%	180 out of 19371 0.929224097878272%	0.596674	1	0.975378
Mismatch repair	ko03430	3 out of 331 0.906344410876133%	184 out of 19371 0.949873522275567%	0.611561	1	0.954174
Glyoxylate and dicarboxylate metabolism	ko00630	4 out of 331 1.20845921450151%	246 out of 19371 1.26993960043364%	0.608579	1	0.951588
Brassinosteroid biosynthesis	ko00905	1 out of 331 0.302114803625378%	62 out of 19371 0.320066078158071%	0.657086	1	0.943914
Tyrosine metabolism	ko00350	3 out of 331 0.906344410876133%	190 out of 19371 0.980847658871509%	0.633194	1	0.924042
Fructose and mannose metabolism	ko00051	4 out of 331 1.20845921450151%	259 out of 19371 1.33705022972485%	0.648779	1	0.903825
Linoleic acid metabolism	ko00591	1 out of 331 0.302114803625378%	75 out of 19371 0.38717670744928%	0.726137	1	0.780302
N-Glycan biosynthesis	ko00510	2 out of 331 0.604229607250755%	150 out of 19371 0.77435341489856%	0.72926	1	0.780302
DNA replication	ko03030	3 out of 331 0.906344410876133%	229 out of 19371 1.18217954674513%	0.753122	1	0.766672
Nucleotide excision repair	ko03420	3 out of 331 0.906344410876133%	246 out of 19371 1.26993960043364%	0.794574	1	0.713691
Porphyrin and chlorophyll metabolism	ko00860	2 out of 331 0.604229607250755%	166 out of 19371 0.856951112487739%	0.778997	1	0.705092
Selenocompound metabolism	ko00450	1 out of 331 0.302114803625378%	87 out of 19371 0.449124980641165%	0.777498	1	0.672674
Circadian rhythm - plant	ko04712	2 out of 331 0.604229607250755%	176 out of 19371 0.908574673480977%	0.805867	1	0.66503
Glycosylphosphatidylinositol(GPI)-anchor biosynthesis	ko00563	1 out of 331 0.302114803625378%	88 out of 19371 0.454287336740488%	0.781317	1	0.66503
Cysteine and methionine metabolism	ko00270	4 out of 331 1.20845921450151%	365 out of 19371 1.88425997625316%	0.873321	1	0.641344
ABC transporters	ko02010	1 out of 331 0.302114803625378%	98 out of 19371 0.505910897733726%	0.816092	1	0.59717
Alanine, aspartate and glutamate metabolism	ko00250	2 out of 331 0.604229607250755%	200 out of 19371 1.03247121986475%	0.858846	1	0.585227
Cyanoamino acid metabolism	ko00460	3 out of 331 0.906344410876133%	303 out of 19371 1.56419389809509%	0.893451	1	0.579432
Purine metabolism	ko00230	6 out of 331 1.81268882175227%	630 out of 19371 3.25228434257395%	0.960455	1	0.557359
RNA transport	ko03013	6 out of 331 1.81268882175227%	634 out of 19371 3.27293376697125%	0.962087	1	0.553842
Fatty acid elongation	ko00062	2 out of 331 0.604229607250755%	220 out of 19371 1.13571834185122%	0.892536	1	0.532024
Stilbenoid, diarylheptanoid and gingerol biosynthesis	ko00945	1 out of 331 0.302114803625378%	111 out of 19371 0.573021527024934%	0.853187	1	0.527231
Glutathione metabolism	ko00480	4 out of 331 1.20845921450151%	458 out of 19371 2.36435909349027%	0.955463	1	0.511115
Regulation of autophagy	ko04140	1 out of 331 0.302114803625378%	115 out of 19371 0.593670951422229%	0.863023	1	0.508893
alpha-Linolenic acid metabolism	ko00592	2 out of 331 0.604229607250755%	238 out of 19371 1.22864075163905%	0.916324	1	0.491787
Homologous recombination	ko03440	2 out of 331 0.604229607250755%	241 out of 19371 1.24412781993702%	0.919774	1	0.485665
Ribosome biogenesis in eukaryotes	ko03008	3 out of 331 0.906344410876133%	378 out of 19371 1.95137060554437%	0.958284	1	0.464466
Cutin, suberine and wax biosynthesis	ko00073	1 out of 331 0.302114803625378%	130 out of 19371 0.671106292912085%	0.894402	1	0.450174
beta-Alanine metabolism	ko00410	1 out of 331 0.302114803625378%	131 out of 19371 0.676268649011409%	0.896219	1	0.446738
Arginine biosynthesis	ko00220	1 out of 331 0.302114803625378%	133 out of 19371 0.686593361210056%	0.899759	1	0.44002
Base excision repair	ko03410	1 out of 331 0.302114803625378%	144 out of 19371 0.743379278302617%	0.917184	1	0.406407
Protein processing in endoplasmic reticulum	ko04141	6 out of 331 1.81268882175227%	889 out of 19371 4.5893345722988%	0.998062	1	0.394979
Spliceosome	ko03040	5 out of 331 1.51057401812689%	761 out of 19371 3.92855299158536%	0.996912	1	0.384512
Phagosome	ko04145	2 out of 331 0.604229607250755%	319 out of 19371 1.64679159568427%	0.974033	1	0.366913
Oxidative phosphorylation	ko00190	5 out of 331 1.51057401812689%	846 out of 19371 4.36735326002788%	0.998993	1	0.345879
Ubiquinone and other terpenoid-quinone biosynthesis	ko00130	1 out of 331 0.302114803625378%	173 out of 19371 0.893087605183006%	0.949968	1	0.338281
Steroid biosynthesis	ko00100	1 out of 331 0.302114803625378%	179 out of 19371 0.924061741778948%	0.954927	1	0.326942
Phenylalanine metabolism	ko00360	1 out of 331 0.302114803625378%	192 out of 19371 0.991172371070156%	0.964053	1	0.304806
RNA degradation	ko03018	2 out of 331 0.604229607250755%	431 out of 19371 2.22497547880853%	0.995268	1	0.271567
Flavonoid biosynthesis	ko00941	1 out of 331 0.302114803625378%	241 out of 19371 1.24412781993702%	0.984699	1	0.242833
Aminoacyl-tRNA biosynthesis	ko00970	1 out of 331 0.302114803625378%	292 out of 19371 1.50740798100253%	0.993725	1	0.20042
Peroxisome	ko04146	1 out of 331 0.302114803625378%	304 out of 19371 1.56935625419441%	0.994914	1	0.192509
Ribosome	ko03010	4 out of 331 1.20845921450151%	1265 out of 19371 6.53038046564452%	1	1	0.185052
Photosynthesis	ko00195	1 out of 331 0.302114803625378%	475 out of 19371 2.45211914717877%	0.999749	1	0.123206
Pyrimidine metabolism	ko00240	1 out of 331 0.302114803625378%	516 out of 19371 2.66377574725105%	0.999878	1	0.113416
